# Supplementary material for: Synergistic Catalysis in Heterobimetallic Complexes for Homogeneous Carbon Dioxide Hydrogenation
Source: MDPI journal article supplement (doi:10.3390/molecules28062574), 2023-03-12
Supplement: s1 [file s1]

# Synergistic Catalysis in Heterobimetallic Complexes for Homogeneous Carbon Dioxide Hydrogenation

Zeno B. G. Fickenschner, Peter Lönnecke, Anna K. Müller<sup>2</sup>, Oldamur Hollóczki<sup>3</sup>,  
Barbara Kirchner<sup>2</sup>, Evamarie Hey-Hawkins\*

Institute of Inorganic Chemistry, Universität Leipzig, Johannisallee 29, D-04103 Leipzig,  
Germany

<sup>2</sup>Mulliken Center for Theoretical Chemistry, Institute for Physical and Theoretical Chemistry,  
Berlingstr. 4, 53115 Bonn, Germany

<sup>3</sup>Department of Physical Chemistry, Faculty of Science and Technology, University of Debrecen,  
Egyetem ter 1, H-4010 Debrecen, Hungary

\* E-mail: [hey@uni-leipzig.de](mailto:hey@uni-leipzig.de)

Web: <https://anorganik.chemie.uni-leipzig.de/de/anorganik/ak-hey-hawkins/>

## Table of Contents

|      |                                                                                                                                          |    |
|------|------------------------------------------------------------------------------------------------------------------------------------------|----|
| 1.   | General Remarks.....                                                                                                                     | 1  |
| 2.   | Synthesis .....                                                                                                                          | 4  |
| 2.1. | Synthesis of Tris(dimethylamino)(phenylamino)phosphonium tetrafluoroborate .....                                                         | 4  |
| 2.2. | Synthesis of Bis[2-(diisopropylphosphanyl)phenyl]-4-(2-pyridyl)phenyl-phosphane ( <b>1</b> ) .                                           | 4  |
| 2.3. | Synthesis of <b>M3</b> .....                                                                                                             | 5  |
| 2.4. | Synthesis of <b>2</b> .....                                                                                                              | 7  |
| 2.5. | Synthesis of [ <b>Mo</b> (CO) <sub>3</sub> ; <b>RhCl</b> ] ( <b>3</b> ).....                                                             | 7  |
| 2.6. | Synthesis of [ <b>Mo</b> (CO) <sub>3</sub> ; <b>IrCl</b> ] ( <b>4</b> ).....                                                             | 9  |
| 2.7. | Synthesis of <b>C2</b> .....                                                                                                             | 10 |
| 2.8. | Synthesis of <b>C1</b> .....                                                                                                             | 11 |
| 3.   | Catalysis.....                                                                                                                           | 13 |
| 3.1. | Procedure 1 .....                                                                                                                        | 13 |
| 3.2. | Catalysts.....                                                                                                                           | 14 |
| 3.3. | Solvent .....                                                                                                                            | 15 |
| 3.4. | Base.....                                                                                                                                | 16 |
| 3.5. | Reaction time / Determination of TOF .....                                                                                               | 17 |
| 4.   | Determination of Thermodynamic Hydricity of [ <b>Ir</b> <sup>III</sup> <b>H</b> ] .....                                                  | 18 |
| 5.   | Mechanistic <sup>1</sup> H NMR Spectroscopic Studies .....                                                                               | 19 |
| 5.1. | Coordination of TMG to <b>M1</b> .....                                                                                                   | 19 |
| 5.2. | <b>M1</b> under H <sub>2</sub> atmosphere .....                                                                                          | 20 |
| 5.3. | Coordination of HCO <sub>2</sub> <sup>-</sup> to <b>M1</b> and subsequent H <sub>2</sub> activation .....                                | 22 |
| 5.4. | H <sub>2</sub> activation by a 1:1 mixture of <b>M1</b> and <b>M3</b> .....                                                              | 24 |
| 6.   | <sup>1</sup> H, <sup>31</sup> P{ <sup>1</sup> H}, <sup>13</sup> C{ <sup>1</sup> H} and <sup>19</sup> F{ <sup>1</sup> H} NMR spectra..... | 26 |
| 6.1. | <b>1</b> .....                                                                                                                           | 26 |

|       |                                                                                                                                      |    |
|-------|--------------------------------------------------------------------------------------------------------------------------------------|----|
| 6.3.  | <b>M3</b> .....                                                                                                                      | 29 |
| 6.4.  | <b>2</b> .....                                                                                                                       | 32 |
| 6.5.  | <b>[Mo(CO)<sub>3</sub>;RhCl] (3)</b> .....                                                                                           | 35 |
| 6.6.  | <b>[Mo(CO)<sub>3</sub>;IrCl] (4)</b> .....                                                                                           | 38 |
| 6.7.  | <b>C2</b> .....                                                                                                                      | 41 |
| 6.8.  | <b>C1</b> .....                                                                                                                      | 45 |
| 6.9.  | Representative <sup>1</sup> H NMR spectrum (400 MHz, D <sub>2</sub> O) of catalytic trials.....                                      | 49 |
| 6.10. | <sup>1</sup> H NMR spectrum (400 MHz, CD <sub>3</sub> CN) of hydricity measurement of <b>[Ir<sup>III</sup>H]</b> at equilibrium..... | 50 |
| 7.    | X-Ray Crystallography and Structure Refinement Details.....                                                                          | 51 |
| 8.    | Electrochemical Data .....                                                                                                           | 55 |
| 8.1.  | Cyclic Voltammogram of <b>M3</b> .....                                                                                               | 55 |
| 8.2.  | Cyclic Voltammogram of <b>M3</b> and <b>M1</b> .....                                                                                 | 56 |
| 8.3.  | Cyclic Voltammogram of <b>M3</b> and <b>M2</b> .....                                                                                 | 57 |
| 8.4.  | Cyclic Voltammogram of <b>C2</b> .....                                                                                               | 58 |
| 8.5.  | Cyclic Voltammogram of <b>C1</b> .....                                                                                               | 59 |
| 9.    | Gibbs Free Energies.....                                                                                                             | 59 |
| 10.   | References.....                                                                                                                      | 60 |

## 1. General Remarks

**Safety advice:** *High-pressure experiments with compressed gases represent a significant safety risk and must be conducted only following appropriate safety procedures and in conjunction with the use of suitable equipment.*

Reactions were performed using standard Schlenk line and glovebox techniques. All high pressure reactions were performed using a TAIATSU TECHNO<sup>®</sup> SUS316 120 CCALL equipped with a TEFLON inlet resulting in a reaction volume of 50 ml and a special made adapter to connect to the Schlenk line. H<sub>2</sub> and CO<sub>2</sub> gas were purchased from ALPHAGAZ and AIR LIQUIDE, respectively, and used without further purification. Reagents were purchased from chemical vendors and used without further purification unless noted otherwise. PCl<sub>3</sub> was degassed, distilled, and stored under nitrogen atmosphere over 4 Å molecular sieve prior to use. NaPF<sub>6</sub>, LiOH, Li<sub>2</sub>CO<sub>3</sub>, Cs<sub>2</sub>CO<sub>3</sub> were dried at 150 °C under reduced pressure for 18 h and stored under nitrogen atmosphere. [RhCp\*Cl<sub>2</sub>]<sub>2</sub> and [IrCp\*Cl<sub>2</sub>]<sub>2</sub> (Cp\* = C<sub>5</sub>Me<sub>5</sub>) were synthesized according to literature procedure as were **M1**, **M2**, bis(2-diisopropylphosphinophenyl)chlorophosphine, bis[2-(diisopropylphosphanyl)phenyl]phenylphosphane and phenyl-tris(dimethylamino)phosphorane [1–7]. The NMR spectra were recorded at 25 °C, unless noted otherwise, with a Bruker AVANCE DRX 400 spectrometer (<sup>1</sup>H NMR: 400.13 MHz, <sup>13</sup>C NMR: 100.16 MHz, <sup>31</sup>P NMR: 161.97 MHz, <sup>19</sup>F NMR: 376.53 MHz). TMS was used as internal standard for <sup>1</sup>H and <sup>13</sup>C NMR spectra, and all spectra of other nuclei were referenced to TMS by using the Ξ scale [8]. In the <sup>13</sup>C NMR spectra of **3**, **4**, **C1** and **C2** several signals corresponding to quaternary carbon atoms and particularly carbon atoms directly adjacent to phosphorus are not observable. Even when a 90° pulse sequence with extended measurement time (~ mass spectra were recorded on a BRUKER DALTONICS Impact II ESI-TOF mass spectrometer or SHIMADZU TQ 8040 GC-EI Quadrupole MS. IR spectra were measured between 4000 bis 400 cm<sup>-1</sup>. The measurement of ATR-IR spectra was done using a THERMOFISHER NICOLET iS5 ATR spectrometer, KBr pellets were measured on a FT-IR SPEKTRUM 2000 spectrometer by PERKINELMER. All solvents were purified and degassed with an MBRAUN Solvent Purification System SPS-800. Dichloromethane (DCM) was stored under nitrogen over 4 Å molecular sieve. Diethyl ether (Et<sub>2</sub>O) was stored under nitrogen over potassium mirror. Tetrahydrofuran (THF) was distilled over K and benzophenone under nitrogen atmosphere and stored over 4 Å molecular sieve. Methanol (MeOH) was dried over Mg, distilled,

stored under N<sub>2</sub> atmosphere over 3 Å molecular sieve. Dimethyl sulfoxide (DMSO) was dried over CaH<sub>2</sub> for 6 h, distilled under reduced pressure over CaH<sub>2</sub> and stored under N<sub>2</sub> atmosphere over 4 Å molecular sieve. Acetonitrile (MeCN) was dried over P<sub>2</sub>O<sub>5</sub> for 3 d, distilled over P<sub>2</sub>O<sub>5</sub>, stored under N<sub>2</sub> atmosphere and over 3 Å molecular sieve. *n*-Pentane and *n*-hexane were stored over potassium under nitrogen atmosphere. All deuterated solvents (CD<sub>2</sub>Cl<sub>2</sub>, C<sub>6</sub>D<sub>6</sub>, CD<sub>3</sub>CN, DMSO-d<sub>6</sub>, THF-d<sub>8</sub>) except D<sub>2</sub>O were dried over 3 Å molecular sieve, degassed using freeze-pump-thaw and stored under N<sub>2</sub> atmosphere over 3 Å molecular sieve. Triethylamine (NEt<sub>3</sub>) and *N,N*-diisopropylethylamine (DIPEA) were stirred over lithium aluminum hydride for 3 d, distilled and stored over 3 Å molecular sieve under nitrogen atmosphere with exclusion of light. Tetramethylguanidine (TMG) and 1,8-diazabicyclo[5.4.0]undec-7-ene (DBU) were directly stored over 3 Å molecular sieve under nitrogen atmosphere after obtaining the chemicals from the vendor. Crystallographic data were collected on a GEMINI-CCD diffractometer (RIGAKU OXFORD DIFFRACTION) using Mo-K $\alpha$  radiation ( $\lambda$  = 71.073 pm),  $\omega$ -scan rotation. Data reduction was performed with CRYSTALIS PRO including the program SCALE3 ABSPACK for empirical absorption correction and an analytical numeric absorption correction using a multifaceted crystal model based on expressions derived by R.C. CLARK & J.S. REID [9,10]. The structure was solved by dual-space methods with SHELXT-2018 and the refinement of all non-hydrogen atoms was performed with SHELXL-2018 [11]. All non-hydrogen atoms were refined with anisotropic thermal parameters and the HFIX command was used to locate all hydrogen atoms for non-disordered regions of the structure. Cyclic voltammetry (CV) measurements on ~1.0 mmol·l<sup>-1</sup> analyte solutions in dry, oxygen-free MeCN containing 0.1 mol·l<sup>-1</sup> tetrabutylammonium hexafluorophosphate as supporting electrolyte have been conducted in a three-electrode setup (GAMRY INSTRUMENTS, SP-50 POTENTIOSTAT by BIOLOGIC SCIENCE INSTRUMENTS) under a blanket of nitrogen at room temperature. The glassy-carbon working electrode (ALS; surface area 0.07 cm<sup>2</sup>) and the counter electrode (NEOLAB; platinum wire, 99.9%) were immersed in the analyte solution, while the reference electrode (ALS; Ag/AgNO<sub>3</sub> (0.01 mol·l<sup>-1</sup>) in 0.1 mol·l<sup>-1</sup> tetrabutylammonium hexafluorophosphate in dry, oxygen-free CH<sub>3</sub>CN) was connected to the cell via a bridge tube (filled with the supporting electrolyte) through VYCOR TIPS. The reference electrode was calibrated against decamethylferrocene as an internal standard at the end of the CV experiment, and the results were converted to the FcH/[FcH]<sup>+</sup> scale in accordance with the IUPAC

requirements [12,13]. The concentration of organo-lithium compounds was determined through titration with N-benzylbenzamide, according to BURCHART [14].

## 2. Synthesis

### 2.1. Synthesis of Tris(dimethylamino)(phenylimino)phosphonium Tetrafluoroborate

Tris(dimethylamino)(phenylimino)phosphorane (1.33 g, 5.24 mmol, 1.0 equiv.) was dissolved in THF (5 ml) and cooled to 0 °C. HBF<sub>4</sub> (0.47 ml of a 11.2 M aqueous sol., 5.24 mmol, 1.0 equiv.) was added dropwise. The mixture was stirred for 10 min. The solvent was removed under reduced pressure and the residue dried in vacuum ( $< 1 \times 10^{-2}$  mbar) for 18 h. The residue was triturated, washed with Et<sub>2</sub>O (3 × 2 ml) and dried under vacuum ( $< 1 \times 10^{-2}$  mbar) for 5 h. The product was obtained as a yellow waxy solid (1.57 g, 4.58 mmol, 87%).

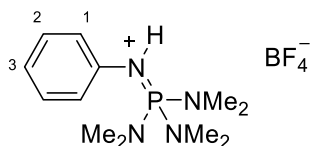

<sup>1</sup>H NMR (400.1 MHz, CD<sub>3</sub>CN):  $\delta$  = 2.71 (d, <sup>3</sup>J<sub>HP</sub> = 10.0 Hz, 18 H, NMe<sub>2</sub>), 6.97 (d, <sup>3</sup>J<sub>HH</sub> = 8.0 Hz, 2 H, 1-H), 7.05 (t, <sup>3</sup>J<sub>HH</sub> = 7.4 Hz, 1 H, 3-H), 7.30 (ddd, <sup>3</sup>J<sub>HH</sub> = 7.5 Hz, <sup>3</sup>J<sub>HH</sub> = 7.5 Hz, <sup>3</sup>J<sub>HH</sub> = 0.9 Hz, 2 H, 2-H) ppm. <sup>31</sup>P {<sup>1</sup>H} NMR (161.97 MHz, CD<sub>3</sub>CN):  $\delta$  = 32.4 (s) ppm.

### 2.2. Synthesis of Bis[2-(diisopropylphosphanyl)phenyl]-4-(2-pyridyl)phenylphosphane (1)

Mg turnings (0.61 g, 25 mmol, 1.1 equiv.) were put in a flame-dried flask and heated to 200 °C under vacuum for two hours. The flask was cooled to room temperature and the Mg turnings covered with THF (5 ml). 2-(4-Bromophenyl)pyridine (5.15 g, 22 mmol, 1.0 equiv.) was dissolved in THF (60 ml) and added dropwise over 40 min under reflux. The mixture was stirred under reflux for 5 h. The concentration of the Grignard reagent solution was determined according to literature [15]. Bis(2-diisopropylphosphinophenyl)chlorophosphine (8.73 g, 19.3 mmol, 1.0 equiv.) was dissolved in Et<sub>2</sub>O (100 ml), cooled to -80 °C and the freshly prepared Grignard reagent solution (60 ml of 0.32 M in THF sol., 19.3 mmol, 1.0 equiv.) was added dropwise. The solution was warmed to room temperature over night. Degassed water (30 ml) was added to the solution, the layers were separated, and the organic layer was washed with brine (2 × 10 ml). The aqueous layers were extracted with Et<sub>2</sub>O (2 × 20 ml) and the combined organic layers were dried over MgSO<sub>4</sub>. The solvent was removed, the residue triturated with Et<sub>2</sub>O (30 ml) and washed with MeCN (60 ml) and MeOH (20 ml). The resulting white powder was dried under vacuum over

night. The product was obtained as a white powder (3.95 g, 10.4 mmol, 54%). Precipitation of the filtrate, at  $-20\text{ }^{\circ}\text{C}$  over 2 months yielded additional product (1.13 g, 1.9 mmol, total yield: 64%)

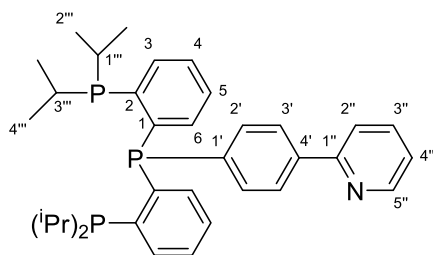

$^1\text{H}$  NMR (400.1 MHz,  $\text{CD}_2\text{Cl}_2$ ):  $\delta$  = 0.83 (ddd,  $^3J_{\text{HP}}$  = 13.8 Hz,  $^3J_{\text{HH}}$  = 12.0,  $^3J_{\text{HH}}$  = 7.0 Hz, 12 H, 2''''-H), 1.11 (ddd,  $^3J_{\text{HP}}$  = 13.8 Hz,  $^3J_{\text{HH}}$  = 7.0 Hz,  $^3J_{\text{HH}}$  = 4.5 Hz, 12 H, 4''''-H), 2.09 (heptd,  $^3J_{\text{HH}}$  = 7.0 Hz,  $^2J_{\text{HP}}$  = 2.2 Hz, 2 H, 3''''-H), 2.18 (heptd,  $^3J_{\text{HH}}$  = 7.0 Hz,  $^2J_{\text{HP}}$  = 2.9 Hz, 2 H, 1''''-H), 6.79 – 6.85 (m, 2 H, 3-H), 7.17 (pt,  $^3J_{\text{HH}}$  = 7.5 Hz, 2 H, 5-H), 7.22 (m, 1 H, 4''-H), 7.25 (dd,  $^3J_{\text{HH}}$  = 8.2,  $J_{\text{HP}}$  = 6.2 Hz, 2 H, 2'-H), 7.31 (td,  $^3J_{\text{HH}}$  = 7.5 Hz,  $^4J_{\text{HH}}$  = 1.4 Hz, 2 H, 4-H), 7.52 (ddpt,  $^3J_{\text{HH}}$  = 7.4 Hz,  $^4J_{\text{HH}}$  = 1.7 Hz,  $^3J_{\text{HP}}$  = 3.5 Hz, 2 H, 6-H), 7.72 - 7.78 (m, 2 H, 3''+2''-H), 7.91 - 7.96 (m, 2 H, 3'-H), 8.65 (dpt,  $^3J_{\text{HH}}$  = 4.8 Hz,  $^4J_{\text{HH}}$  = 1.4 Hz, 1 H, 5''-H) ppm.  $^{13}\text{C}\{^1\text{H}\}$  NMR (100.6 MHz,  $\text{CD}_2\text{Cl}_2$ ):  $\delta$  = 19.5 (d,  $^2J_{\text{CP}}$  = 10.8 Hz,  $\text{C}^{4''}$ ), 20.0 (m,  $\text{C}^{4''}$ ), 24.6 (ddd,  $^1J_{\text{CP}}$  = 32.6 Hz,  $^1J_{\text{CP}}$  = 14.1 Hz,  $^1J_{\text{CP}}$  = 4.5 Hz,  $\text{C}^{1''}$ ), 25.6 (s,  $\text{C}^{2''}$ ), 120.3 (s,  $\text{C}^{4''}$ ), 122.2 (s,  $\text{C}^{3''}$ ), 126.3 (d,  $^3J_{\text{CP}}$  = 6.4 Hz,  $\text{C}^{3'}$ ), 127.8 (s,  $\text{C}^4$ ), 128.6 (s,  $\text{C}^5$ ), 132.2 (d,  $^2J_{\text{CP}}$  = 6.0 Hz,  $\text{C}^6$ ), 134.5 (m,  $\text{C}^3$ ), 134.9 (d,  $^2J_{\text{CP}}$  = 19.9 Hz,  $\text{C}^{2'}$ ), 136.7 (s,  $\text{C}^{4'}$ ), 138.8 (m,  $\text{C}^{1'}$ ), 142.6 (m,  $\text{C}^2$ ), 146.8 (m,  $\text{C}^1$ ), 149.5 (s,  $\text{C}^{5''}$ ) 156.8 (s,  $\text{C}^{1''}$ ) ppm.  $^{31}\text{P}\{^1\text{H}\}$  NMR (161.97 MHz,  $\text{CD}_2\text{Cl}_2$ ):  $\delta$  = -15.8 (dd,  $J_{\text{PP}}$  = 158 Hz,  $J_{\text{PP}}$  = 148 Hz,  $\text{P}(\text{aryl})_3$ ), -1.4 (dd,  $J_{\text{PP}}$  = 152 Hz,  $J_{\text{PP}}$  = 4 Hz,  $\text{P}(\text{iPr})_2$ ) ppm. HR-MS: ( $\text{C}_{35}\text{H}_{44}\text{NP}_3$ ;  $[\text{M}+\text{H}]^+$ , pos. ESI) calcd.: 572.277, found: 572.274.

### 2.3. Synthesis of **M3**

$[\text{Mo}(\text{CO})_3(\text{MeCN})_3]$  (34 mg, 0.11 mmol, 1.0 equiv.) and bis[2-(diisopropylphosphanyl)phenyl]phenylphosphane (55 mg, 0.11 mmol, 1.0 equiv.) were dissolved in THF (2 ml). The mixture was stirred at  $60\text{ }^{\circ}\text{C}$  over night. The solvent was removed, the residue washed with *n*-pentane ( $3 \times 2$  ml). The residue was dried under vacuum. The product was obtained as a yellow powder (86 mg, 0.12 mmol, quant.). Single crystals were obtained by slow evaporation of solvent from a saturated benzene solution.



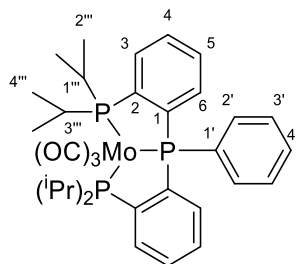

$^1\text{H}$  NMR (400.1 MHz,  $\text{C}_6\text{D}_6$ ):  $\delta$  = 0.31 (dd,  $^3J_{\text{HP}}$  = 13.6 Hz,  $^3J_{\text{HH}}$  = 6.9 Hz, 6 H, 2'''-H<sup>A</sup>), 0.53 (dd,  $^3J_{\text{HP}}$  = 13.7 Hz,  $^3J_{\text{HH}}$  = 7.0 Hz, 6 H, 4'''-H<sup>A</sup>), 0.79 (dd,  $^3J_{\text{HP}}$  = 13.0 Hz,  $^3J_{\text{HH}}$  = 7.0 Hz, 6 H, 4'''-H<sup>B</sup>), 0.97 (dd,  $^3J_{\text{HP}}$  = 17.0 Hz,  $^3J_{\text{HH}}$  = 6.9 Hz, 6 H, 2'''-H<sup>B</sup>), 1.69 (mc, 2 H, 3'''-H), 2.18 (mc, 2 H, 1'''-H), 6.61 (mc, 4 H), 6.74 (td,  $^3J_{\text{HH}}$  = 7.3 Hz,  $^4J_{\text{HH}}$  = 1.6 Hz, 2 H), 6.86 (s, 1 H), 6.91 – 6.96 (m, 2 H) 7.18 (t,  $^3J_{\text{HH}}$  = 6.8 Hz, 2 H, 5-H), 7.33 (mc, 2 H) ppm.  $^{13}\text{C}\{^1\text{H}\}$  NMR (100.6 MHz,  $\text{C}_6\text{D}_6$ ):  $\delta$  = 19.1 (br.s., C<sup>2'''A</sup>), 19.3 (br.s., C<sup>4'''A</sup>), 20.3 (s, C<sup>4'''B</sup>), 20.4 (s, C<sup>2'''B</sup>), 28.8 (mc, C<sup>3'''</sup>), 29.9 (t,  $^1J_{\text{CP}}$  = 11.5 Hz, C<sup>1'''</sup>), 128.6 (s, C<sup>Ar</sup>), 128.7 (s, C<sup>6</sup>), 128.8 (s, C<sup>Ar</sup>), 129.0 (d,  $^2J_{\text{CP}}$  = 4.6 Hz, C<sup>Ar</sup>), 129.4 (s, C<sup>Ar</sup>), 130.4 (s, C<sup>Ar</sup>), 130.6 (s, C<sup>Ar</sup>), 132.6 (s, C<sup>Ar</sup>), 132.7 (s, C<sup>Ar</sup>), 132.8 (t,  $^2J_{\text{CP}}$  = 5.9 Hz, C<sup>Ar</sup>), 137.5 (m, C<sup>1'</sup>), 143.7 (m, C<sup>1</sup>), 146.8 (m, C<sup>2</sup>), 222.2 (s, CO) ppm.  $^{31}\text{P}\{^1\text{H}\}$  NMR (161.97 MHz,  $\text{C}_6\text{D}_6$ ):  $\delta$  = 72.1 (d,  $J_{\text{PP}}$  = 7.8 Hz, P(<sup>i</sup>Pr)<sub>2</sub>), 80.0 (t,  $J_{\text{PP}}$  = 7.8 Hz, P(aryl)<sub>3</sub>) ppm. IR (KBr), selected vibrations: 1928 (s, Mo-CO), 1847 (s, Mo-CO),  $\text{cm}^{-1}$ . HR-MS: ( $\text{C}_{33}\text{H}_{41}\text{KMoO}_3\text{P}_3$ ;  $[\text{M}+\text{K}]^+$ , pos. ESI) calcd.: 709.097, found: 709.101.

## 2.4. Synthesis of **2**

[Mo(CO)<sub>3</sub>(MeCN)<sub>3</sub>] (357 mg, 1.17 mmol, 1.0 equiv.) and **1** (670 mg, 1.17 mmol, 1.0 equiv.) were dissolved in THF (12 ml). The mixture was stirred under reflux over night. Then the solvent was removed, the residue washed with *n*-pentane (3 × 3 ml) and Et<sub>2</sub>O (2 ml) and dried under vacuum. The product was obtained as a yellow powder (978 mg, 1.17 mmol, quant.). Single crystals were obtained by vapor diffusion of *n*-hexane into a saturated benzene solution.

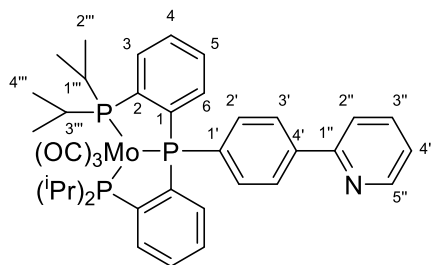

<sup>1</sup>H NMR (400.1 MHz, C<sub>6</sub>D<sub>6</sub>): δ = 0.60 (dd, <sup>3</sup>J<sub>HP</sub> = 14.0 Hz, <sup>3</sup>J<sub>HH</sub> = 6.9 Hz, 6 H, 2'''-H<sup>A</sup>), 0.83 (dd, <sup>3</sup>J<sub>HP</sub> = 13.6 Hz, <sup>3</sup>J<sub>HH</sub> = 7.0 Hz, 6 H, 4'''-H<sup>A</sup>), 1.09 (dd, <sup>3</sup>J<sub>HP</sub> = 12.8 Hz, <sup>3</sup>J<sub>HH</sub> = 6.8 Hz, 6 H, 4'''-H<sup>B</sup>), 1.27 (dd, <sup>3</sup>J<sub>HP</sub> = 16.4 Hz, <sup>3</sup>J<sub>HH</sub> = 6.9 Hz, 6 H, 2'''-H<sup>B</sup>), 2.00 (hep, <sup>3</sup>J<sub>HH</sub> = 7.0 Hz, 2 H, 3'''-H), 2.49 (hep, <sup>3</sup>J<sub>HH</sub> = 7.1 Hz, 2 H, 1'''-H), 6.60 (dd, <sup>3</sup>J<sub>HH</sub> = 7.4 Hz, <sup>3</sup>J<sub>HH</sub> = 4.8 Hz, 1 H, 4''-H), 6.88 – 6.95 (m, 4 H, 3 + 5-H), 7.02 (td, <sup>3</sup>J<sub>HH</sub> = 7.8 Hz, <sup>4</sup>J<sub>HH</sub> = 1.8 Hz, 1 H, 3''-H), 7.15 (mc, 1 H, 2''-H), 7.23 (mc, 2 H, 6-H), 7.57 (t, <sup>3</sup>J<sub>HH</sub> = 6.8 Hz, 2 H, 4-H), 7.77 (dd, <sup>3</sup>J<sub>HP</sub> = 10.2 Hz, <sup>3</sup>J<sub>HH</sub> = 8.3 Hz, 2 H, 2'-H), 8.07 (dd, <sup>3</sup>J<sub>HH</sub> = 8.4 Hz, <sup>3</sup>J<sub>HP</sub> = 2.0 Hz, 2 H, 3'-H), 8.52 (dd, <sup>3</sup>J<sub>HH</sub> = 5.0 Hz, <sup>4</sup>J<sub>HH</sub> = 1.8 Hz, 1 H, 5''-H) ppm. <sup>13</sup>C{<sup>1</sup>H} NMR (100.6 MHz, C<sub>6</sub>D<sub>6</sub>): δ = 18.7 (s, C<sup>2'''A</sup>), 18.9 (s, C<sup>4'''A</sup>), 19.9 (s, C<sup>4'''B</sup>), 20.0 (t, <sup>2</sup>J<sub>CP</sub> = 4.5 Hz, C<sup>2'''B</sup>), 28.4 (mc, C<sup>3'''</sup>), 29.6 (t, <sup>1</sup>J<sub>CP</sub> = 10.5 Hz, C<sup>1'''</sup>), 120.1 (s, C<sup>2''</sup>), 121.9 (s, C<sup>4''</sup>), 126.9 (d, <sup>2</sup>J<sub>CP</sub> = 9.4 Hz, C<sup>3'</sup>), 128.5 (s, C<sup>3</sup>), 128.7 (s, C<sup>5</sup>), 130.0 (d, <sup>2</sup>J<sub>CP</sub> = 15 Hz, C<sup>6</sup>), 132.6 (mc, C<sup>1'</sup>), 132.8 (s, C<sup>2'</sup>), 135.9 (s, C<sup>3''</sup>), 140.1 (s, C<sup>4'</sup>), 143.9 (ddd, <sup>1</sup>J<sub>CP</sub> = 10.3 Hz, <sup>2</sup>J<sub>CP</sub> = 21.6 Hz, <sup>4</sup>J<sub>CP</sub> = 38.3 Hz, C<sup>2</sup>), 146.7 (ddd, <sup>1</sup>J<sub>CP</sub> = 14.0 Hz, <sup>2</sup>J<sub>CP</sub> = 17.5 Hz, <sup>4</sup>J<sub>CP</sub> = 34.0 Hz, C<sup>1</sup>) 149.6 (s, C<sup>5''</sup>), 156.2 (s, C<sup>1''</sup>), 225.3 (s, CO), 221.97 (d, <sup>2</sup>J<sub>CP</sub> = 6.5 Hz, CO) ppm. <sup>31</sup>P{<sup>1</sup>H} NMR (161.97 MHz, C<sub>6</sub>D<sub>6</sub>): δ = 72.0 (d, J<sub>PP</sub> = 8.0 Hz, P(<sup>i</sup>Pr)<sub>2</sub>), 79.2 (t, J<sub>PP</sub> = 8.0 Hz, P(aryl)<sub>3</sub>) ppm. IR (KBr), selected vibrations: 1931 (s, Mo-CO), 1845 (s, Mo-CO) cm<sup>-1</sup>. HR-MS: (C<sub>38</sub>H<sub>44</sub>KMoNO<sub>3</sub>P<sub>3</sub>; [M+K]<sup>+</sup>, pos. ESI) calcd.: 786.123, found: 786.122.

## 2.5. Synthesis of [Mo(CO)<sub>3</sub>;RhCl] (**3**)

**2** (75 mg, 0.1 mmol, 1.0 equiv.), [RhCp\*Cl<sub>2</sub>]<sub>2</sub> (31 mg, 0.05 mmol, 0.5 equiv.) and NaOAc (25 mg, 0.3 mmol, 3.0 equiv.) were dissolved in DCM (5 ml) and stirred for 5 h. The mixture was filtered

over celite, the solvent was removed, the residue washed with *n*-pentane (3 × 3 ml) and dried under vacuum. The product was obtained as a yellow powder (78 mg, 0.08 mmol, 76%). Single crystals were obtained by vapor diffusion of *n*-pentane into a saturated DCM solution.

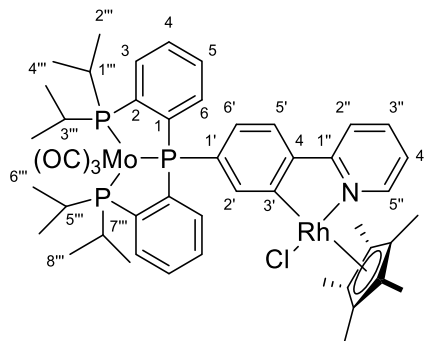

$^1\text{H}$  NMR (400.1 MHz,  $\text{CD}_2\text{Cl}_2$ ):  $\delta$  = 0.56 (dd,  $^3J_{\text{HP}}$  = 13.7 Hz,  $^3J_{\text{HH}}$  = 6.9 Hz, 3 H, 2'''-H<sup>A</sup>), 0.83 (dd,  $^3J_{\text{HP}}$  = 13.5 Hz,  $^3J_{\text{HH}}$  = 6.9 Hz, 3 H, 4'''-H<sup>A</sup>), 0.98 (dd,  $^3J_{\text{HP}}$  = 13.7 Hz,  $^3J_{\text{HH}}$  = 7.1 Hz, 3 H, 2'''-H<sup>B</sup>), 1.04 (dd,  $^3J_{\text{HP}}$  = 14.7 Hz,  $^3J_{\text{HH}}$  = 7.2 Hz, 3 H, 4'''-H<sup>B</sup>), 1.11 (dd,  $^3J_{\text{HP}}$  = 13.4 Hz,  $^3J_{\text{HH}}$  = 6.9 Hz, 6 H, 6'''-H), 1.25 (dd,  $^3J_{\text{HP}}$  = 11.0 Hz,  $^3J_{\text{HH}}$  = 6.1 Hz, 3 H, 8'''-H<sup>A</sup>), 1.31 (dd,  $^3J_{\text{HP}}$  = 10.5 Hz,  $^3J_{\text{HH}}$  = 6.8 Hz, 3 H, 8'''-H<sup>B</sup>), 1.46 (s, 15 H, Cp\*), 2.13 (mc, 1 H, 1'''-H), 2.21 (mc, 1 H, 3'''-H), 2.97 – 2.80 (m, 2 H, 5''' & 7'''-H), 7.20 (pq,  $^3J_{\text{HH}}$  = 1.8 Hz, 1 H), 7.22 (dt,  $^3J_{\text{HH}}$  = 4.8 Hz,  $^4J_{\text{HH}}$  = 1.8 Hz, 1 H), 7.36 (ddt,  $^3J_{\text{HH}}$  = 9.4 Hz,  $^3J_{\text{HH}}$  = 7.9 Hz,  $^3J_{\text{HH}}$  = 6.4 Hz, 2 H), 7.42 – 7.46 (m, 2 H), 7.57 (tt,  $^3J_{\text{HH}}$  = 6.8 Hz,  $^4J_{\text{HH}}$  = 1.7 Hz, 1 H), 7.63 – 7.65 (m, 2 H), 7.71 (mc, 1 H), 7.75 – 7.83 (m, 4 H), 8.73 (dd,  $^3J_{\text{HH}}$  = 5.6 Hz,  $^4J_{\text{HH}}$  = 1.4 Hz, 1 H, 5''-H) ppm.  $^{13}\text{C}\{^1\text{H}\}$  NMR (100.6 MHz,  $\text{CD}_2\text{Cl}_2$ ):  $\delta$  = 9.3 (s, Cp\*-Me), 19.3 (d,  $^2J_{\text{CP}}$  = 3.4 Hz C<sup>2'''A</sup>), 19.5 (s, C<sup>4'''A</sup>), 20.3 (s, C<sup>6'''A</sup>), 20.4 (s, C<sup>8'''A</sup>), 20.5 (d,  $^2J_{\text{CP}}$  = 2.6 Hz, C<sup>8'''B</sup>), 20.6 (s, C<sup>2'''B</sup>), 21.0 (s, C<sup>6'''A</sup>), 21.1 (s, C<sup>4'''B</sup>), 28.7 (d,  $^1J_{\text{CP}}$  = 9.3 Hz, C<sup>3'''</sup>), 29.1 (d,  $^1J_{\text{CP}}$  = 9.3 Hz, C<sup>1'''</sup>), 29.3 (d,  $^1J_{\text{CP}}$  = 13.4 Hz, C<sup>5'''</sup>), 29.6 (d,  $^1J_{\text{CP}}$  = 12.7 Hz, C<sup>7'''</sup>), 96.4 (d,  $^1J_{\text{CRh}}$  = 4.3 Hz, Cp\*-Me), 120.0 (s), 122.9 (s), 123.3 (s, C<sup>4''</sup>), 123.5 (s), 127.9 (s), 128.2 (s), 129.3 (d,  $J_{\text{CP}}$  = 15.7 Hz), 129.6 (d,  $J_{\text{CP}}$  = 4.3 Hz), 129.8 (d,  $J_{\text{CP}}$  = 3.2 Hz), 130.8 (d,  $J_{\text{CP}}$  = 14.1 Hz), 131.2 (d,  $J_{\text{CP}}$  = 14.3 Hz), 133.4 (d,  $J_{\text{CP}}$  = 11.9 Hz), 137.6 (s, C<sup>3''</sup>), 140.0 (d,  $J_{\text{CP}}$  = 5.0 Hz), 145.0 (s, C<sup>4'</sup>), 151.6 (s, C<sup>5''</sup>), 164.9 (s, C<sup>1''</sup>), 179.1 (d, C<sup>3'</sup>) ppm.  $^{31}\text{P}\{^1\text{H}\}$  NMR (161.97 MHz,  $\text{CD}_2\text{Cl}_2$ ):  $\delta$  = 69.7 (d,  $J_{\text{PP}}$  = 23.8 Hz, P(<sup>i</sup>Pr)<sub>2</sub>), 71.5 (d,  $J_{\text{PP}}$  = 24.2 Hz, P(<sup>i</sup>Pr)<sub>2</sub>), 78.0 (t,  $J_{\text{PP}}$  = 7.3 Hz, P(aryl)<sub>3</sub>) ppm. IR (KBr), selected vibrations: 1931 (s, Mo-CO), 1843 (s, Mo-CO)  $\text{cm}^{-1}$ . HR-MS: (C<sub>48</sub>H<sub>59</sub>MoNO<sub>3</sub>P<sub>3</sub>Rh; [M-Cl]<sup>+</sup>, pos. ESI) calcd.: 990.173, found: 990.179.

## 2.6. Synthesis of [Mo(CO)<sub>3</sub>IrCl] (4)

**2** (812 mg, 1.08 mmol, 1.0 equiv.), [IrCp\*Cl<sub>2</sub>]<sub>2</sub> (430 mg, 0.54 mmol, 0.5 equiv.) and NaOAc (266 mg, 3.3 mmol, 3.0 equiv.) were dissolved in DCM (20 ml) and stirred over night. The mixture was filtered over celite, the solvent was removed, the residue washed with *n*-pentane (3 × 10 ml) and dried under vacuum. The product was obtained as a yellow powder (1.15 g, 1.03 mmol, 96%). Single crystals were obtained by vapor diffusion of *n*-pentane into a saturated DCM solution.

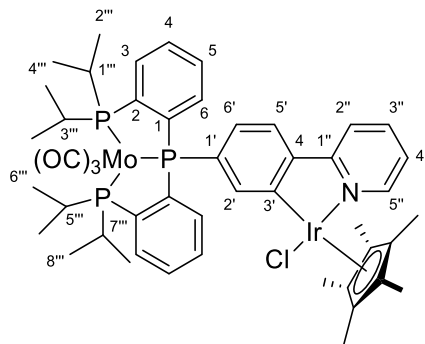

<sup>1</sup>H NMR (400.1 MHz, CD<sub>2</sub>Cl<sub>2</sub>): δ = 0.56 (dd, <sup>3</sup>J<sub>HP</sub> = 13.7 Hz, <sup>3</sup>J<sub>HH</sub> = 6.9 Hz, 3 H, 2'''-H<sup>A</sup>), 0.82 (dd, <sup>3</sup>J<sub>HP</sub> = 13.6 Hz, <sup>3</sup>J<sub>HH</sub> = 6.9 Hz, 3 H, 4'''-H<sup>A</sup>), 0.98 (dd, <sup>3</sup>J<sub>HP</sub> = 13.8 Hz, <sup>3</sup>J<sub>HH</sub> = 7.1 Hz, 3 H, 2'''-H<sup>B</sup>), 1.04 (dd, <sup>3</sup>J<sub>HP</sub> = 14.7 Hz, <sup>3</sup>J<sub>HH</sub> = 7.2 Hz, 3 H, 4'''-H<sup>B</sup>), 1.09 (dd, <sup>3</sup>J<sub>HP</sub> = 13.3 Hz, <sup>3</sup>J<sub>HH</sub> = 6.9 Hz, 3 H, 6'''-H<sup>A</sup>), 1.11 (dd, <sup>3</sup>J<sub>HP</sub> = 13.3 Hz, <sup>3</sup>J<sub>HH</sub> = 7.0 Hz, 3 H, 6'''-H<sup>B</sup>), 1.25 (dd, <sup>3</sup>J<sub>HP</sub> = 9.5 Hz, <sup>3</sup>J<sub>HH</sub> = 6.8 Hz, 3 H, 8'''-H<sup>A</sup>), 1.30 (dd, <sup>3</sup>J<sub>HP</sub> = 9.5 Hz, <sup>3</sup>J<sub>HH</sub> = 6.8 Hz, 3 H, 8'''-H<sup>B</sup>), 1.51 (s, 15 H, Cp\*), 2.13 (mc, 1 H, 1'''-H), 2.21 (mc, 1 H, 2'''-H), 2.67 – 2.79 (m, 2 H, 5''' & 7'''-H), 7.13 – 7.19 (m, 2 H), 7.37 (mc, 2 H), 7.40 – 7.46 (m, 2 H), 7.58 (mc, 1 H), 7.62 – 7.66 (m, 1 H), 7.69 – 7.82 (m, 6 H), 8.69 (dt, <sup>3</sup>J<sub>HH</sub> = 5.5 Hz, <sup>4</sup>J<sub>HH</sub> = 1.3 Hz, 1 H, 5''-H) ppm. <sup>13</sup>C{<sup>1</sup>H} NMR (100.6 MHz, CD<sub>2</sub>Cl<sub>2</sub>): δ = 8.5 (s, Cp\*-Me), 18.8 (d, <sup>2</sup>J<sub>CP</sub> = 2.3 Hz C<sup>2'''A</sup>), 19.0 (s, C<sup>4'''A</sup>), 19.1 (s, C<sup>6'''A</sup>), 19.8 (s, C<sup>8'''A</sup>), 19.9 (s, C<sup>8'''B</sup>), 20.0 (s, C<sup>6'''B</sup>), 20.0 (s, C<sup>6'''B</sup>), 20.6 (s, C<sup>4'''B</sup>), 28.1 (d, <sup>1</sup>J<sub>CP</sub> = 8.0 Hz, C<sup>3'''</sup>), 28.5 (d, <sup>1</sup>J<sub>CP</sub> = 9.8 Hz, C<sup>1'''</sup>), 29.0 (d, <sup>1</sup>J<sub>CP</sub> = 11.0 Hz, C<sup>5'''</sup>), 29.1 (d, <sup>1</sup>J<sub>CP</sub> = 11.5 Hz, C<sup>7'''</sup>), 88.5 (s, Cp\*-Me), 119.3 (s), 122.7 (s), 123.2 (s, C<sup>4''</sup>), 123.4 (s), 126.6 (s), 128.7 (s), 129.0 (br.s), 129.2 (d, J<sub>CP</sub> = 4.8 Hz), 130.3 (d, J<sub>CP</sub> = 5.3 Hz), 130.6 (d, J<sub>CP</sub> = 13.6 Hz), 132.8 (d, J<sub>CP</sub> = 12.0 Hz), 133.4 (d, J<sub>CP</sub> = 12.2 Hz), 137.0 (s, C<sup>3''</sup>), 138.5 (d, J<sub>CP</sub> = 4.5 Hz), 145.1 (s, C<sup>4''</sup>), 151.2 (s, C<sup>5''</sup>), 166.4 (s, C<sup>1''</sup>) ppm. <sup>31</sup>P{<sup>1</sup>H} NMR (161.97 MHz, CD<sub>2</sub>Cl<sub>2</sub>): δ = 69.8 (d, J<sub>PP</sub> = 24.5 Hz, P(<sup>i</sup>Pr)<sub>2</sub>), 71.5 (d, J<sub>PP</sub> = 20.3 Hz, P(<sup>i</sup>Pr)<sub>2</sub>), 77.8 (t, J<sub>PP</sub> = 7.4 Hz, P(aryl)<sub>3</sub>) ppm. IR (KBr), selected vibrations: 1928 (s, Mo-CO), 1841 (s, Mo-CO) cm<sup>-1</sup>. HR-MS: (C<sub>48</sub>H<sub>59</sub>IrMoNO<sub>3</sub>P<sub>3</sub>; [M-Cl]<sup>+</sup>, pos. ESI) calcd.: 1080.231, found: 1080.231.

## 2.7. Synthesis of **C2**

**3** (184 mg, 0.18 mmol, 1.0 equiv.) and NaPF<sub>6</sub> (30 mg, 0.18 mmol, 1.0 equiv.) were dissolved in MeCN (5 ml) and stirred for 6 h under reflux. The mixture was filtered over celite, the solvent was removed, the residue washed with *n*-pentane (3 × 3 ml) and dried under vacuum. The product was obtained as a yellow powder (202 mg, 0.17 mmol, 96%). Single crystals were obtained by diffusion of *n*-pentane into a saturated THF solution, over the course of 3 months. In the obtained crystals, MeCN was displaced by CO, most likely released as a decomposition product.

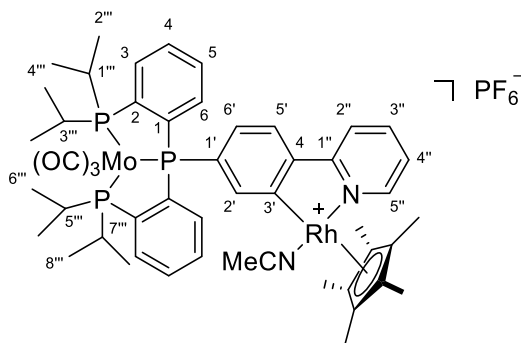

<sup>1</sup>H NMR (400.1 MHz, CD<sub>3</sub>CN): δ = 0.60 (dd, <sup>3</sup>J<sub>HP</sub> = 12.9 Hz, <sup>3</sup>J<sub>HH</sub> = 6.9 Hz, 3 H, 2'''-H<sup>A</sup>), 0.79 (dd, <sup>3</sup>J<sub>HP</sub> = 13.0 Hz, <sup>3</sup>J<sub>HH</sub> = 6.9 Hz, 3 H, 4'''-H<sup>A</sup>), 0.97 – 1.13 (m, 12 H, 2''', 4''', 6''', 8'''-H<sup>B</sup>), 1.21 (dd, <sup>3</sup>J<sub>HP</sub> = 16.7 Hz, <sup>3</sup>J<sub>HH</sub> = 6.8 Hz, 3 H, 6'''-H<sup>A</sup>), 1.35 (dd, <sup>3</sup>J<sub>HP</sub> = 17.0 Hz, <sup>3</sup>J<sub>HH</sub> = 6.8 Hz, 3 H, 8'''-H<sup>A</sup>), 1.45 (s, 15 H, Cp\*), 1.96 (s, 3 H, MeCN), 2.07 (mc, 1 H, 1'''-H), 2.20 (mc, 1 H, 3'''-H), 2.77 (mc, 1 H, 5'''-H), 2.91 (mc, 1 H, 7'''-H), 6.98 (ddd, <sup>3</sup>J<sub>HH</sub> = 9.7 Hz, <sup>3</sup>J<sub>HH</sub> = 8.0 Hz, <sup>3</sup>J<sub>HH</sub> = 1.6 Hz, 1 H, 6'-H), 7.41 (ddd, <sup>3</sup>J<sub>HH</sub> = 6.6 Hz, <sup>3</sup>J<sub>HH</sub> = 5.6 Hz, <sup>3</sup>J<sub>HH</sub> = 2.4 Hz, 1 H, 4''-H), 7.52 – 7.56 (m, 4 H), 7.62 (dd, <sup>3</sup>J<sub>HH</sub> = 10.8 Hz, <sup>4</sup>J<sub>HH</sub> = 1.6 Hz, 1 H, 2'-H), 7.71 (dd, <sup>3</sup>J<sub>HH</sub> = 8.0 Hz, <sup>4</sup>J<sub>HH</sub> = 2.0 Hz, 1 H, 5'-H), 7.82 – 7.86 (m, 3 H), 7.91 – 7.99 (m, 3 H), 8.74 (dt, <sup>3</sup>J<sub>HH</sub> = 5.6 Hz, <sup>4</sup>J<sub>HH</sub> = 1.3 Hz, 1 H, 5''-H) ppm. <sup>13</sup>C{<sup>1</sup>H} NMR (100.6 MHz, CD<sub>3</sub>CN): δ = 1.32 (s, MeCN), 9.3 (s, Cp\*-Me), 19.6 (s, C<sup>2'''A</sup>), 19.7 (s, C<sup>4'''A</sup>), 19.9 (s, C<sup>6'''B</sup>), 20.1 (s, C<sup>8'''B</sup>), 20.6 (s, C<sup>8'''A</sup>), 21.1 (s, C<sup>2'''B</sup>), 21.2 (s, C<sup>4'''B</sup>), 21.7 (s, C<sup>6'''A</sup>), 29.2 (s, C<sup>5'''</sup>), 29.5 (s, C<sup>3'''</sup>), 29.6 (s, C<sup>7'''</sup>), 30.1 (s, C<sup>1'''</sup>), 99.3 (d, <sup>1</sup>J<sub>CRh</sub> = 6.5 Hz, Cp\*-Me), 117.7 (s, MeCN), 121.3 (s), 124.4 (s, C<sup>5'</sup>), 125.0 (s, C<sup>4''</sup>), 128.3 (s, C<sup>6'</sup>), 130.7 (s), 130.9 (s), 131.9 (s), 133.8 (s), 134.0 (s), 140.3 (s), 140.6 (s), 142.3 (s), 153.3 (s, C<sup>5''</sup>), 165.4 (s, C<sup>1''</sup>), 173.5 (d, C<sup>3'</sup>), 223.5 (s, CO), 226.9 (s, CO) ppm. <sup>31</sup>P{<sup>1</sup>H} NMR (161.97 MHz, CD<sub>3</sub>CN): δ = -144.6 (hept, <sup>1</sup>J<sub>PF</sub> = 706 Hz, PF<sub>6</sub>), 71.9 (dd, <sup>3</sup>J<sub>PP</sub> = 23.6 Hz, <sup>3</sup>J<sub>PP</sub> = 6.0 Hz, P(<sup>i</sup>Pr)<sub>2</sub>), 72.3 (dd, <sup>3</sup>J<sub>PP</sub> = 23.5 Hz, <sup>3</sup>J<sub>PP</sub> = 5.5 Hz, P(<sup>i</sup>Pr)<sub>2</sub>), 80.5 (t, <sup>3</sup>J<sub>PP</sub> = 5.9 Hz, P(aryl)<sub>3</sub>) ppm. <sup>19</sup>F{<sup>1</sup>H} NMR

(376.53 MHz, CD<sub>3</sub>CN):  $\delta = -73.0$  (d,  $^1J_{\text{FP}} = 706$  Hz, PF<sub>6</sub>) ppm. IR (KBr), selected vibrations: 1929 (s, Mo-CO), 1842 (s, Mo-CO), 842 (s, PF<sub>6</sub>), cm<sup>-1</sup>. HR-MS: (C<sub>48</sub>H<sub>59</sub>MoNO<sub>3</sub>P<sub>3</sub>Rh; [M-PF<sub>6</sub>]<sup>+</sup>, pos. ESI) calcd.: 990.173, found: 990.179.

## 2.8. Synthesis of C1

**4** (111 mg, 0.10 mmol, 1.0 equiv.) and NaPF<sub>6</sub> (17 mg, 0.10 mmol, 1.0 equiv.) were dissolved in MeCN (2 ml) and stirred under reflux over night. The mixture was filtered over celite and the solvent was removed under reduced pressure. The residue was dissolved in THF (2 ml), precipitated with *n*-pentane (2 ml) and filtered off. The yellow powder was washed with *n*-pentane (3 × 1 ml) and dried under vacuum. The product was obtained as a yellow powder (122 mg, 0.09 mmol, 97%). Single crystals were obtained by diffusion of *n*-hexane into a saturated THF solution, over the course of 4 months. In the obtained crystals, MeCN was displaced by N<sub>2</sub>.

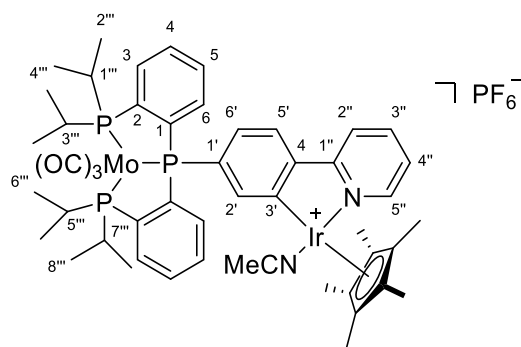

<sup>1</sup>H NMR (400.1 MHz, CD<sub>3</sub>CN):  $\delta = 0.62$  (dd,  $^3J_{\text{HP}} = 12.9$  8Hz,  $^3J_{\text{HH}} = 7.0$  Hz, 3 H, 2'''-H<sup>A</sup>), 0.76 (dd,  $^3J_{\text{HP}} = 12.9$  Hz,  $^3J_{\text{HH}} = 7.0$  Hz, 3 H, 4'''-H<sup>A</sup>), 0.97 – 1.13 (m, 12 H, 2''', 4'', 6'', 8'''-H<sup>B</sup>), 1.24 (dd,  $^3J_{\text{HP}} = 16.8$  Hz,  $^3J_{\text{HH}} = 6.7$  Hz, 3 H, 6'''-H<sup>A</sup>), 1.34 (dd,  $^3J_{\text{HP}} = 17.0$  Hz,  $^3J_{\text{HH}} = 6.8$  Hz, 3 H, 8'''-H<sup>A</sup>), 1.51 (s, 15 H, Cp\*), 1.96 (s, 3 H, MeCN), 2.06 (m<sub>c</sub>, 1 H, 1'''-H), 2.17 (m<sub>c</sub>, 1 H, 3'''-H), 2.79 (m<sub>c</sub>, 1 H, 5'''-H), 2.90 (m<sub>c</sub>, 1 H, 7'''-H), 6.96 (ddd,  $^3J_{\text{HH}} = 9.9$  Hz,  $^3J_{\text{HH}} = 8.0$  Hz,  $^3J_{\text{HH}} = 1.7$  Hz, 1 H, 6'-H), 7.35 (ddd,  $^3J_{\text{HH}} = 7.3$  Hz,  $^3J_{\text{HH}} = 5.7$  Hz,  $^3J_{\text{HH}} = 1.5$  Hz, 1 H, 4'-H), 7.51 – 7.56 (m, 5 H), 7.59 (dd,  $^3J_{\text{HH}} = 10.9$  Hz,  $^4J_{\text{HH}} = 1.5$  Hz, 1 H, 2'-H), 7.74 (dd,  $^3J_{\text{HH}} = 8.1$  Hz,  $^4J_{\text{HH}} = 2.1$  Hz, 1 H, 5'-H), 7.82 – 7.85 (m, 2 H), 7.94 (ddd,  $^3J_{\text{HH}} = 8.2$  Hz,  $^4J_{\text{HH}} = 7.3$  Hz,  $^5J_{\text{HH}} = 1.6$  Hz 1 H), 7.98 – 8.04 (m, 2 H), 8.72 (ddd,  $^3J_{\text{HH}} = 5.6$  Hz,  $^4J_{\text{HH}} = 1.3$  Hz,  $^5J_{\text{HH}} = 0.8$  Hz 1 H, 5''-H) ppm. <sup>13</sup>C{<sup>1</sup>H} NMR (100.6 MHz, CD<sub>3</sub>CN):  $\delta = 1.32$  (sept, MeCN), 9.0 (s, Cp\*-Me), 19.6 (s, C<sup>2'''A</sup>), 20.0 (s, C<sup>4'''A</sup>), 20.5 (s, C<sup>6'''B</sup>), 20.6 (s, C<sup>8'''B</sup>), 21.37 (s, C<sup>8'''A</sup>) 21.39 (s, C<sup>2'''B</sup>), 21.6 (s, C<sup>4'''B</sup>), 21.7 (s, C<sup>6'''A</sup>), 29.1 (m, C<sup>5'''</sup>), 29.2 (m, C<sup>3'''</sup>), 29.3 (s, C<sup>7'''</sup>), 29.9 (s, C<sup>1'''</sup>), 92.2 (s,

$Cp^*$ -Me), 118.3 (s, MeCN), 121.1 (s), 124.6 (d,  $J_{CP} = 9.7$  Hz,  $C^{5'}$ ), 125.8 (s,  $C^{4''}$ ), 127.6 (d,  $J_{CP} = 12.1$  Hz  $C^{6'}$ ), 130.7 (s), 130.9 (s), 131.0 (d,  $J_{CP} = 5.1$  Hz), 131.8 (d,  $J_{CP} = 3.1$  Hz), 131.9 (d,  $J_{CP} = 3.7$  Hz), 133.7 (d,  $J_{CP} = 11.3$  Hz), 133.9 (d,  $J_{CP} = 11.9$  Hz), 140.0 (s), 140.1 (s), 140.5 (s), 146.5 (d,  $J_{CP} = 1.2$  Hz) 153.8 (s,  $C^{5''}$ ), 167.3 (s,  $C^{1''}$ ) ppm.  $^{31}P\{^1H\}$  NMR (161.97 MHz,  $CD_3CN$ ):  $\delta = -144.7$  (hept,  $^1J_{PF} = 706$  Hz,  $PF_6$ ), 72.1 (dd,  $^3J_{PP} = 23.4$  Hz,  $^3J_{PP} = 6.2$  Hz,  $P(iPr)_2$ ), 72.3 (dd,  $J_{PP} = 23.5$  Hz,  $^3J_{PP} = 6.1$  Hz,  $P(iPr)_2$ ), 80.2 (t,  $^3J_{PP} = 5.9$  Hz,  $P(aryl)_3$ ) ppm.  $^{19}F\{^1H\}$  NMR (376.53 MHz,  $CD_3CN$ ):  $\delta = -73.0$  (d,  $^1J_{FP} = 706$  Hz,  $PF_6$ ) ppm. IR (KBr), selected vibrations: 1929 (s, Mo-CO), 1842 (s, Mo-CO), 844 (s,  $PF_6$ )  $cm^{-1}$ . HR-MS: ( $C_{48}H_{59}IrMoNO_3P_3$ ;  $[M-PF_6]^+$ , pos. ESI) calcd.: 1080.234, found: 1080.231.

### 3. Catalysis

#### 3.1. Procedure 1

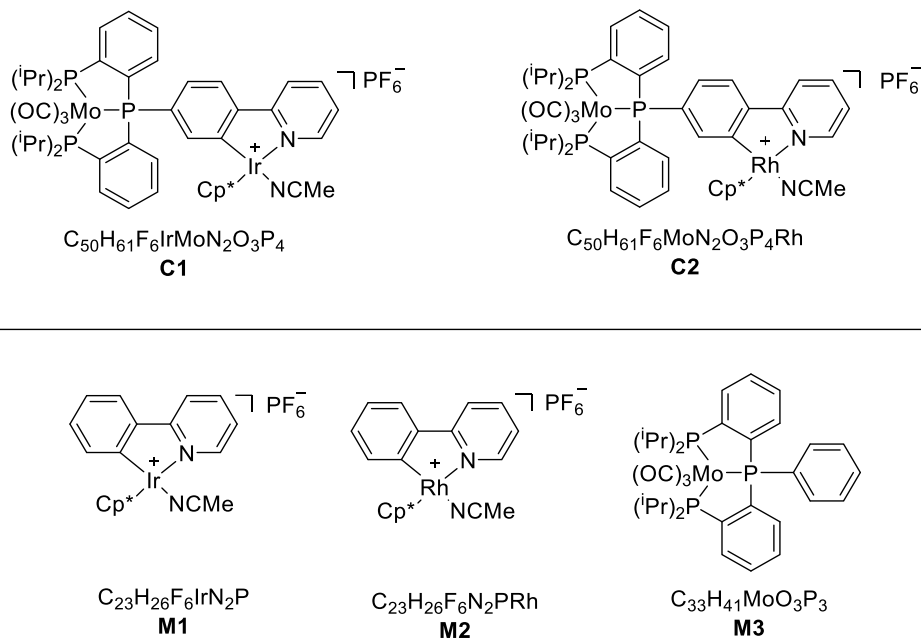

A 50 ml autoclave was heated to 50 °C at  $1 \times 10^{-3}$  mbar for 2 h and then charged with an Ar atmosphere, using a special made adapter for connecting to a Schlenk line. The *catalyst* (1 ml of a 3 mM MeCN sol., corresponds to 3  $\mu\text{mol}$  of catalyst) was added. When using a different solvent then acetonitrile, the solvent was removed under vacuum. *Base* (0.5 mmol) and *solvent* (to achieve a total volume of 2 ml) were added. The adapter was exchanged for the head of the autoclave and the apparatus was charged with 30 bar of dihydrogen. The pressure was vented down to 10 bar, raised back up to 30 bar and vented again, to flush out any air that was introduced while changing the top. After repeating this procedure for 3 times the dihydrogen pressure was set to 30 bar and the mixture was stirred at 50 °C for 30 min. Then 27 bar of CO<sub>2</sub> were added (57 bar of total pressure) and the mixture was stirred at 50 °C for 22 h. The reaction was stopped by venting the reaction vessel. The mixture was dissolved in acetone (3  $\times$  2 ml) and the solvent removed under reduced pressure. The residue was dissolved in D<sub>2</sub>O (1 ml) and filtered over a glass filter paper. The concentration of formate was determined by <sup>1</sup>H NMR spectroscopy using a capillary containing benzene in C<sub>6</sub>D<sub>6</sub>, which had been calibrated using formate solutions with known concentrations in D<sub>2</sub>O. The yield was calculated accordingly.



## 3.2. Catalysts

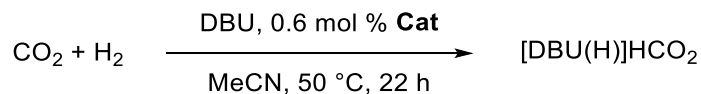

All reactions were performed according to **Procedure 1** using 1,8-diazabicyclo[5.4.0]undec-7-ene (DBU) (75  $\mu\text{l}$ , 0.5 mmol, 1.0 equiv.), *catalyst* (1.0 ml of a 3 mM MeCN sol., corresponds to 3  $\mu\text{mol}$  of catalyst) and MeCN (1 ml, corresponding to a total volume of 2 ml). When using a mixture of two catalysts no additional MeCN was added.

*Table S1:* Performance of different catalyst for CO<sub>2</sub> hydrogenation.

| entry | catalyst               | n([DBU(H)]HCO <sub>2</sub> ) [ $\mu\text{mol}$ ] | yield [%] <sup>a)</sup> | TON |
|-------|------------------------|--------------------------------------------------|-------------------------|-----|
| 1     | <b>C1</b>              | 383                                              | 77                      | 128 |
|       |                        | 394                                              | 79                      | 131 |
|       |                        | 377                                              | 75                      | 126 |
| 2     | <b>M3</b>              | 5                                                | 1                       | 2   |
|       |                        | 2                                                | 0                       | 1   |
| 3     | <b>M1</b>              | 70                                               | 14                      | 23  |
|       |                        | 75                                               | 15                      | 25  |
| 4     | <b>M1 + M3</b>         | 110                                              | 22                      | 37  |
|       |                        | 111                                              | 22                      | 37  |
| 5     | <b>No cat.</b>         | 0                                                | 0                       | 0   |
| 6     | <b>C2</b>              | 34                                               | 7                       | 11  |
|       |                        | 50                                               | 10                      | 17  |
| 7     | <b>M2</b>              | 10                                               | 2                       | 3   |
|       |                        | 15                                               | 3                       | 5   |
| 8     | <b>M2 + M3</b>         | 8                                                | 2                       | 3   |
|       |                        | 10                                               | 2                       | 3   |
| 12    | <b>C1<sup>b)</sup></b> | 36                                               | 7                       | 12  |
| 13    | <b>C1<sup>c)</sup></b> | 168                                              | 34                      | 56  |

<sup>a)</sup> In relation to 0.5 mmol DBU. <sup>b)</sup> p(H<sub>2</sub>) = p(CO) = 15 bar, corresponds to a total pressure of 30 bar. <sup>c)</sup> reaction mixture was not stirred.

### 3.3. Solvent

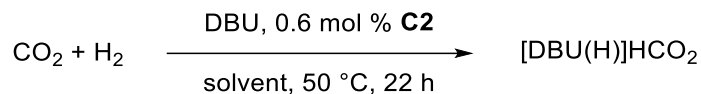

All reactions were performed according to **Procedure 1** using DBU (75  $\mu\text{l}$ , 0.5 mmol, 1.0 equiv.) and **C2** (1.0 ml of a 3 mM MeCN sol., corresponds to 3  $\mu\text{mol}$  of catalyst). After removal of the solvent under vacuum *solvent* (2 ml) was added. When using deuterated solvent, the reaction mixture was taken directly from the reaction vessel, filtered over a glass filter paper and the yield determined using  $^1\text{H}$  NMR spectroscopy.

Table S2: Influence of solvent on catalytic  $\text{CO}_2$  hydrogenation using **C2**.

| entry | Solvent             | n([DBU(H)]HCO <sub>2</sub> ) [ $\mu\text{mol}$ ] | yield [%] <sup>a)</sup> | TON |
|-------|---------------------|--------------------------------------------------|-------------------------|-----|
| 1     | MeCN                | 383                                              | 77                      | 128 |
|       |                     | 394                                              | 79                      | 131 |
|       |                     | 377                                              | 75                      | 126 |
| 2     | DMSO-d <sub>6</sub> | 36                                               | 7                       | 12  |
| 3     | D <sub>2</sub> O    | 48                                               | 10                      | 16  |
| 4     | THF                 | 46                                               | 9                       | 15  |

<sup>a)</sup> In relation to 0.5 mmol DBU.

### 3.4. Base

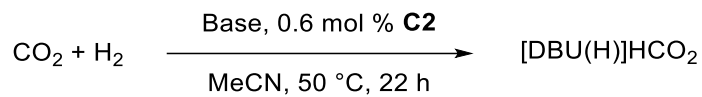

All reactions were performed according to **Procedure 1** using *base* (0.5 mmol, 1.0 equiv.), **C2** (1.0 ml of a 3 mM MeCN sol., corresponds to 3  $\mu\text{mol}$  of catalyst) and MeCN (1 ml, corresponding to a total volume of 2 ml).

Table S3: Influence of base on catalytic CO<sub>2</sub> hydrogenation using **C2**.

| entry | Base                                 | n([DBU(H)]HCO <sub>2</sub> ) [ $\mu\text{mol}$ ] | yield [%] <sup>a)</sup> | TON |
|-------|--------------------------------------|--------------------------------------------------|-------------------------|-----|
| 1     | Li <sub>2</sub> CO <sub>3</sub>      | traces                                           | 0                       | 0   |
| 2     | LiOH                                 | 5                                                | 1                       | 2   |
| 3     | Cs <sub>2</sub> CO <sub>3</sub>      | 13                                               | 3                       | 4   |
| 4     | No base                              | Traces                                           | <1                      | 0   |
| 5     | NEt <sub>3</sub>                     | 135                                              | 27                      | 45  |
| 6     | DIPEA                                | 92                                               | 18                      | 31  |
| 7     | PhNP(NMe <sub>2</sub> ) <sub>3</sub> | 6                                                | 1                       | 2   |
| 8     | DBU                                  | 383                                              | 77                      | 128 |
|       |                                      | 394                                              | 79                      | 131 |
|       |                                      | 377                                              | 75                      | 126 |
| 9     | TMG                                  | 500                                              | 100                     | 168 |

<sup>a)</sup> In relation to 0.5 mmol base.

### 3.5. Reaction time / Determination of TOF

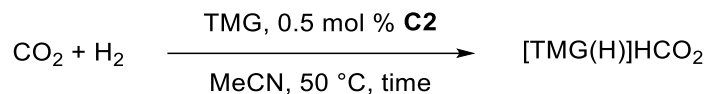

All reactions were performed according to **Procedure 1** using Tetramethylguanidine (TMG) (67  $\mu\text{l}$ , 0.634 mmol, 1.0 equiv.) and **C2** (1.0 ml of a 3 mM MeCN sol., corresponds to 3  $\mu\text{mol}$  of catalyst).

Table S4: Monitoring of **C2** for CO<sub>2</sub> hydrogenation using TMG as a base.

| entry | Time [h] | n([TMG(H)]HCO <sub>2</sub> ) [ $\mu\text{mol}$ ] | yield [%] <sup>a)</sup> | TON |
|-------|----------|--------------------------------------------------|-------------------------|-----|
| 1     | 2        | 31                                               | 5                       | 10  |
|       |          | 41                                               | 6                       | 14  |
| 2     | 4        | 45                                               | 7                       | 15  |
|       |          | 84                                               | 13                      | 28  |
| 3     | 8        | 98                                               | 15                      | 33  |
|       |          | 113                                              | 18                      | 38  |
| 4     | 16       | 277                                              | 44                      | 92  |
|       |          | 216                                              | 34                      | 72  |
| 5     | 22       | 550                                              | 87                      | 183 |
|       |          | 505                                              | 79                      | 168 |
| 6     | 70       | 1265                                             | 200                     | 422 |
|       |          | 1122                                             | 177                     | 374 |
| 7     | 140      | 1109                                             | 175                     | 370 |

<sup>a)</sup> In relation to 0.634 mmol TMG.

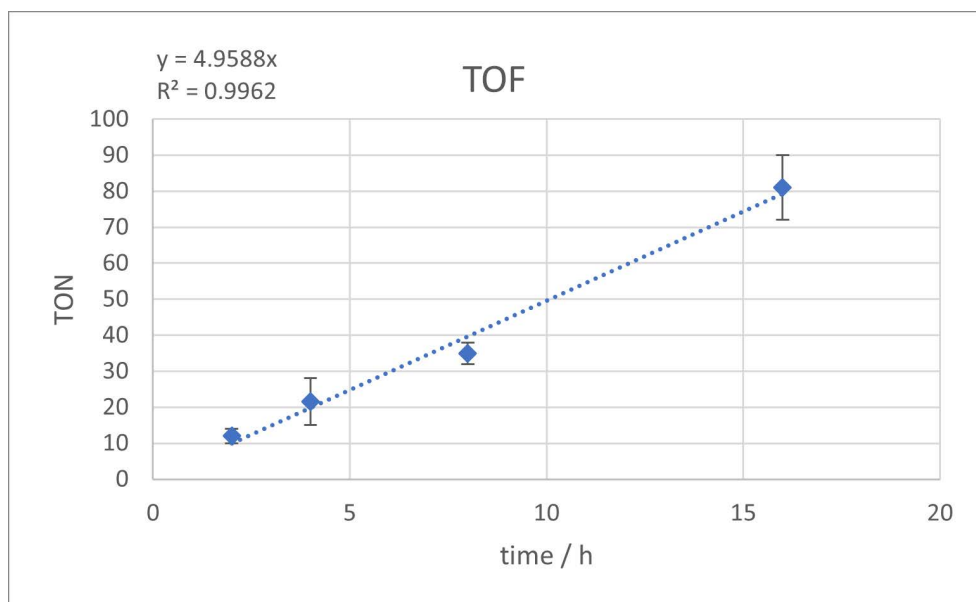

*Scheme 1:* Kinetic plot of formate turnovers versus time (hours) using entries 1 – 4 in Table S4. The plot is linear and the slope represents the rate ( $\text{TOF}_1 = 5.0 \text{ h}^{-1}$ ).

#### 4. Determination of Thermodynamic Hydricity of $[\text{Ir}^{\text{III}}\text{H}]$ [6]

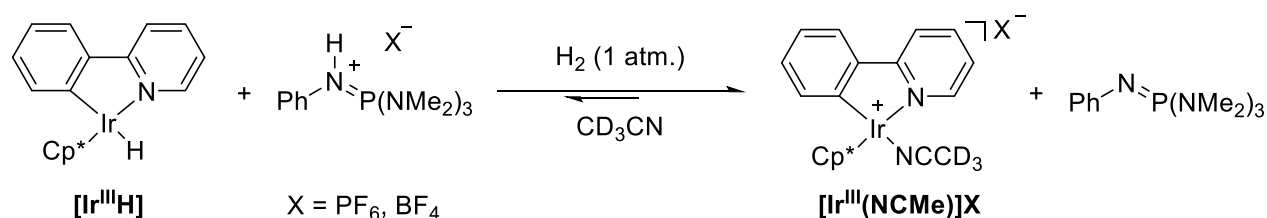

**M1** (8.2 mg, 12.3  $\mu\text{mol}$ , 1.0 equiv.), tris(dimethylamino)(phenylamino)phosphonium tetrafluoroborate (13.0 mg, 51.1  $\mu\text{mol}$ , ~4 equiv.) and tris(dimethylamino)(phenylimino)phosphorane (15.4 mg, 45.0  $\mu\text{mol}$ ) were accurately weighed into a YOUNG NMR tube and dissolved in  $\text{CD}_3\text{CN}$  (0.7 ml). The mixture was degassed using freeze-pump-thaw and set under 1 atm of  $\text{H}_2$ . The reaction was monitored using  $^1\text{H}$  NMR spectroscopy until the equilibrium was reached (24 h). The ratio of  $[\text{Ir}^{\text{III}}\text{H}]$  and  $[\text{Ir}^{\text{III}}(\text{NCMe})]\text{X}$  was determined using the respective  $\text{Cp}^*$  signal. The concentrations of the four components were calculated from their initial concentration. The procedure was repeated twice. An average equilibrium constant ( $K_{\text{eq}}$ ) of 0.75 atm was calculated. By substituting this value in eq. 1, a  $\Delta G_{\text{H}^-}^0$  of 47.1(7)  $\text{kcal/mol}$  was obtained. [6]

$$\Delta G_{\text{H}^-}^0 (\text{kcal/mol}) = -1.364 \log(K_{\text{eq}}) - 1.364 pK_a(\text{Et}_3\text{NH}^+) + 76.0 \quad (1)$$

## 5. Mechanistic $^1\text{H}$ NMR Spectroscopic Studies

### 5.1. Coordination of TMG to **M1**

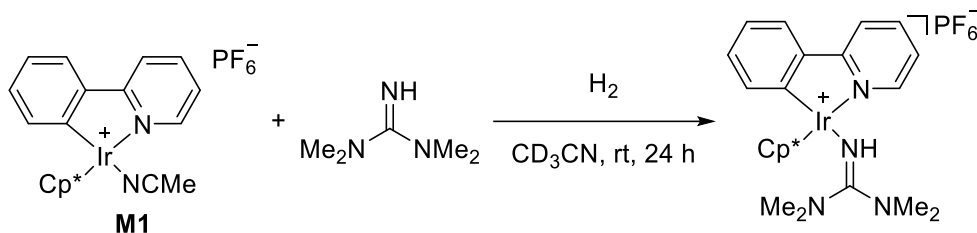

**M1** (5.4 mg, 8.0  $\mu\text{mol}$ , 1.0 equiv.) and 1,1,3,3-tetramethylguanidine (6.1 mg, 53  $\mu\text{mol}$ , ~10 equiv.) were accurately weighed into a YOUNG NMR tube and dissolved in CD<sub>3</sub>CN (0.7 ml). The mixture was degassed using freeze-pump-thaw and set under 1 atm of H<sub>2</sub>. The reaction was monitored for 24 h using  $^1\text{H}$  NMR spectroscopy.

$^1\text{H}$  NMR (400 MHz, CD<sub>3</sub>CN)

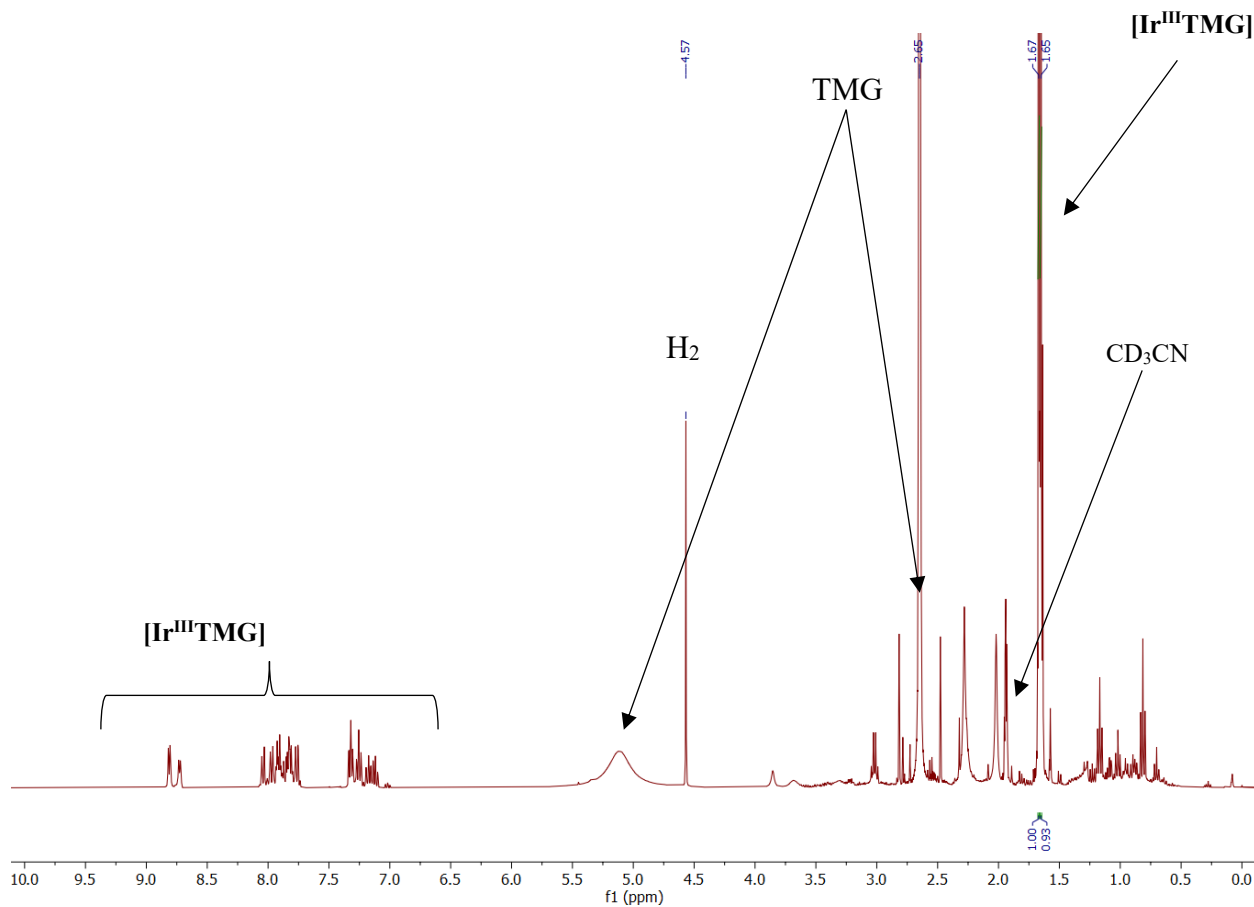

## 5.2. **M1** under H<sub>2</sub> atmosphere

While [**Ir**<sup>III</sup>**H**] is stable in CD<sub>3</sub>CN for weeks, **M1** is decomposing slowly over the course of several days under 1 atm of H<sub>2</sub>. A signal in the <sup>1</sup>H NMR spectrum at −15.5 ppm emerges. Whereas this single signal is almost identical in chemical shift to the hydridic signal of [**Ir**<sup>III</sup>**H**], the remaining spectrum does not fit, particularly the Cp\* resonance. Additionally, no Cp\* signal with a fitting integral of 15 in relation to the signal at −15.5 ppm was found. To find out whether this signal corresponds to the proposed intermediate [**Ir**<sup>III</sup>(η<sup>2</sup>-H<sub>2</sub>)]<sup>+</sup>, an HD test was performed and the T1-relaxation time of the hydridic signal was measured [16–19]. When using HD instead of H<sub>2</sub>, no change in the <sup>1</sup>H NMR spectrum could be observed. The T1-relaxation time was determined using an inversion recovery experiment (at 400 MHz, at 298 K) as 5306 ms, which is too high for both a non-classical hydride (>80 ms) and a classical hydride (<150 ms). Like the decomposition of **M1** under H<sub>2</sub> atmosphere in THF-d<sub>8</sub> this signal could arise from a multimetallic cluster due to degradation of the active catalyst. Similar Rh nanoclusters were reported to have T1 times between 938 and 1732 ms (at 300 K and 500 MHz), which is still significantly shorter than those found here, but also significantly larger than those typical for both classical and non-classical hydrides. Furthermore, when the atmosphere was subsequently changed from H<sub>2</sub> to N<sub>2</sub> the observed signal did not subside, which means that the species is not in equilibrium with free solvated dihydrogen, but rather results from a reaction of the complex with dihydrogen. However, as the resulting product could not be isolated, full characterization was not possible.

## Experimental Procedure

**M1** (6.4 mg, 9.6 μmol, 1.0 equiv.) was weighed into a YOUNG NMR tube and dissolved in CD<sub>3</sub>CN (0.5 ml). The mixture was degassed using freeze-pump-thaw and set under 1 atm of H<sub>2</sub>. When HD gas instead of H<sub>2</sub> gas was used, no change in the <sup>1</sup>H NMR spectrum was observed. The decomposition was monitored for 1 week using <sup>1</sup>H NMR spectroscopy. Then the T1 time of the signal at −15.5 ppm was determined (T1 = 5306 ms at 25 °C and 400 MHz). After T1 was measured, the mixture was again degassed using freeze-pump-thaw and set under N<sub>2</sub> atmosphere, which led to no further changes.

$^1\text{H}$  NMR (400 MHz,  $\text{CD}_3\text{CN}$ )

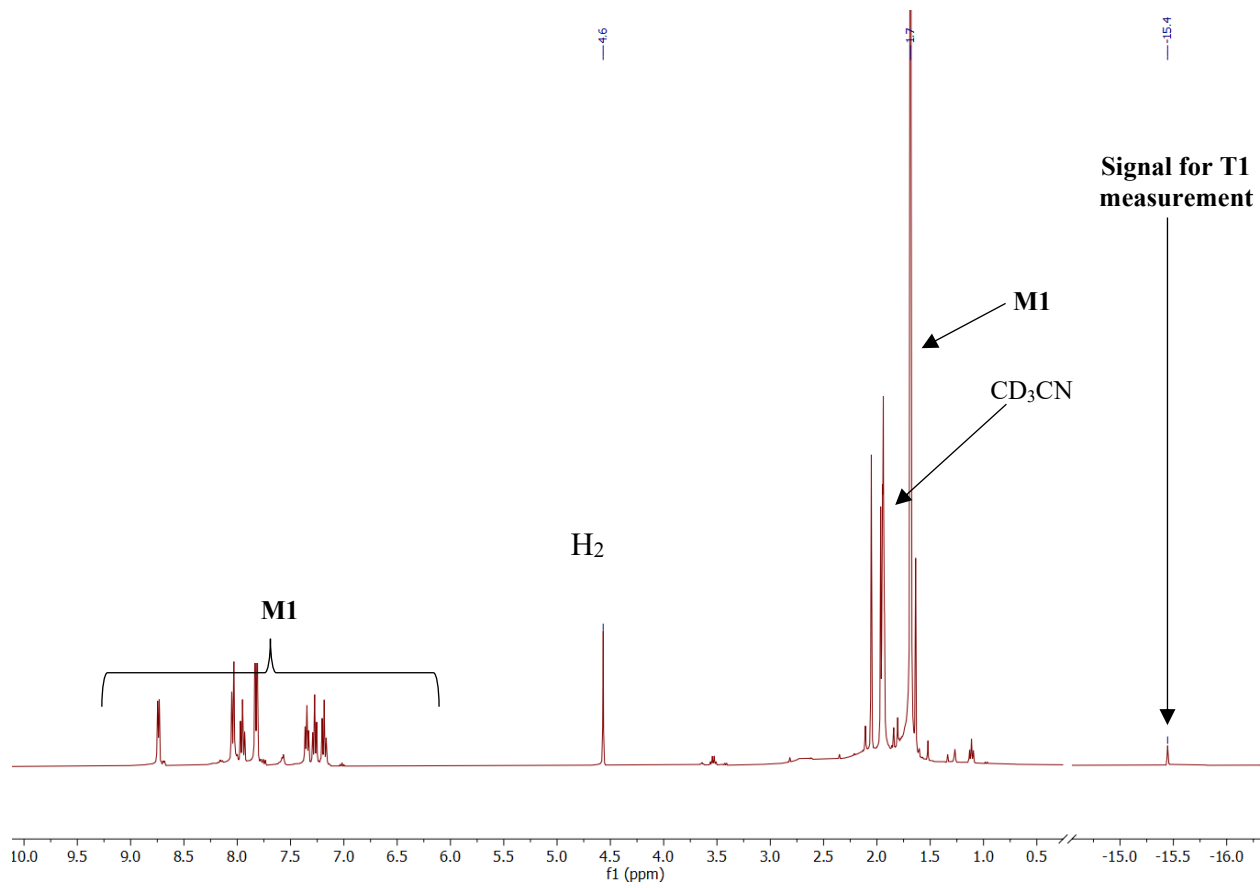



### 5.3. Coordination of $\text{HCO}_2^-$ to **M1** and subsequent $\text{H}_2$ activation

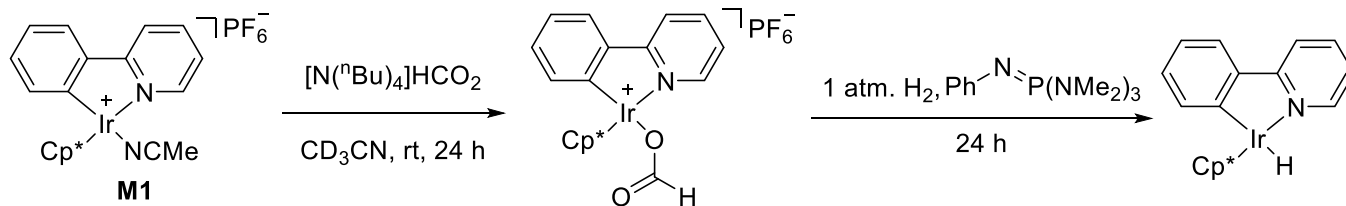

**M1** (2.9 mg, 4.3  $\mu\text{mol}$ , 1.0 equiv.) and tetrabutylammonium formate (1.3 mg, 4.3  $\mu\text{mol}$ , 1.0 equiv.) were accurately weighed into a YOUNG NMR tube and dissolved in  $\text{CD}_3\text{CN}$  (0.7 ml). The mixture was kept at room temperature for 24 h, then a  $^1\text{H}$  NMR spectrum was recorded. Phenyltris(dimethylamino)phosphorane (3.3 mg, 12.9  $\mu\text{mol}$ , 3.0 equiv.) was added, the mixture degassed using freeze-pump-thaw and set under 1 atm of  $\text{H}_2$ . The reaction was monitored for 24 h using  $^1\text{H}$  NMR spectroscopy.

$^1\text{H}$  NMR (400 MHz,  $\text{CD}_3\text{CN}$ ) before  $\text{H}_2$  activation:

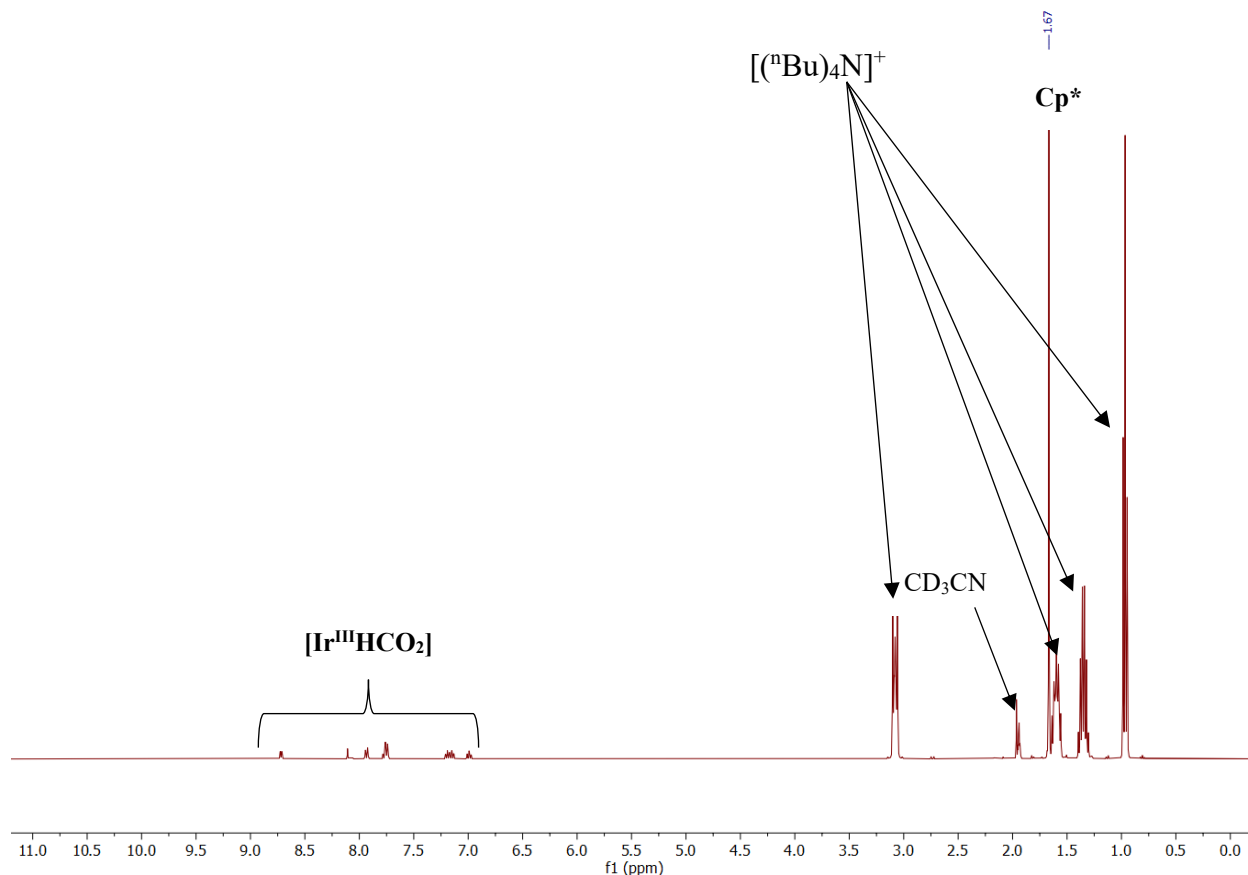

$^1\text{H}$  NMR (400 MHz,  $\text{CD}_3\text{CN}$ ) after  $\text{H}_2$  activation:

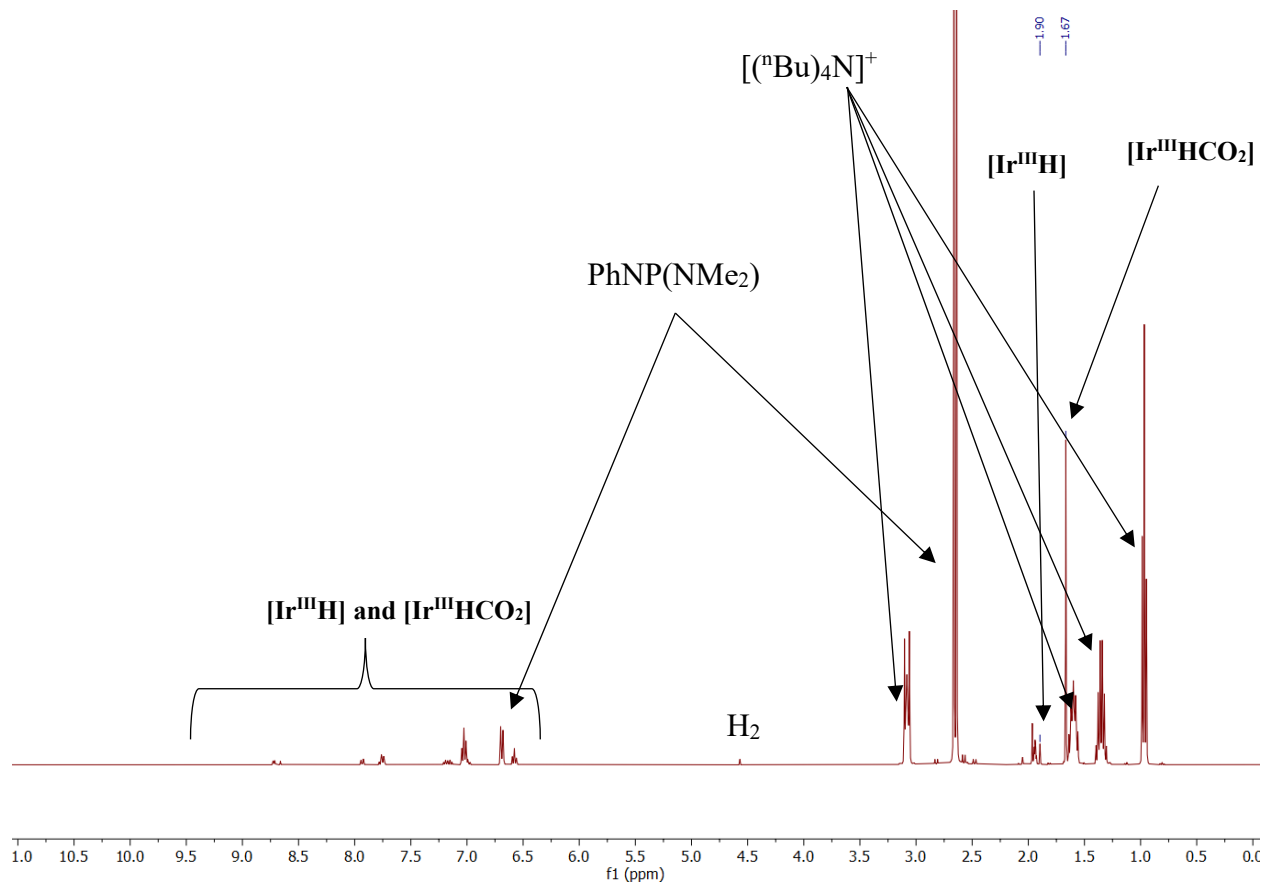

## 5.4. H<sub>2</sub> activation by a 1:1 mixture of **M1** and **M3**

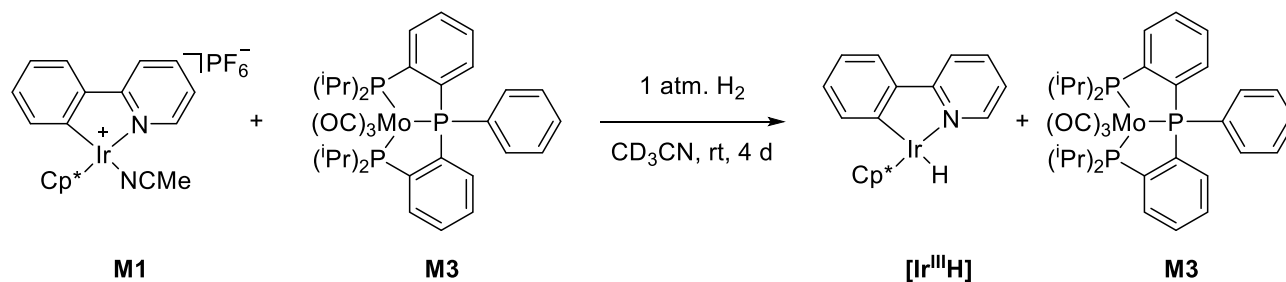

**M1** (8.0 mg, 5.4  $\mu\text{mol}$ , 1.0 equiv.), **M3** (8.0 mg, 5.3  $\mu\text{mol}$ , 1.0 equiv.) and  $\text{NEt}_3$  (2.4 mg, 24  $\mu\text{mol}$ , 3.0 equiv.) were dissolved in  $\text{CD}_3\text{CN}$  (0.5 ml) in a YOUNG NMR tube. The mixture was degassed using freeze-pump-thaw and set under 1 atm of  $\text{H}_2$ . Every day for 4 days a  $^1\text{H}$  NMR spectrum and a  $^{31}\text{P}\{^1\text{H}\}$  NMR spectrum were recorded.

$^1\text{H}$  NMR (400 MHz,  $\text{CD}_3\text{CN}$ ) after 4 days:

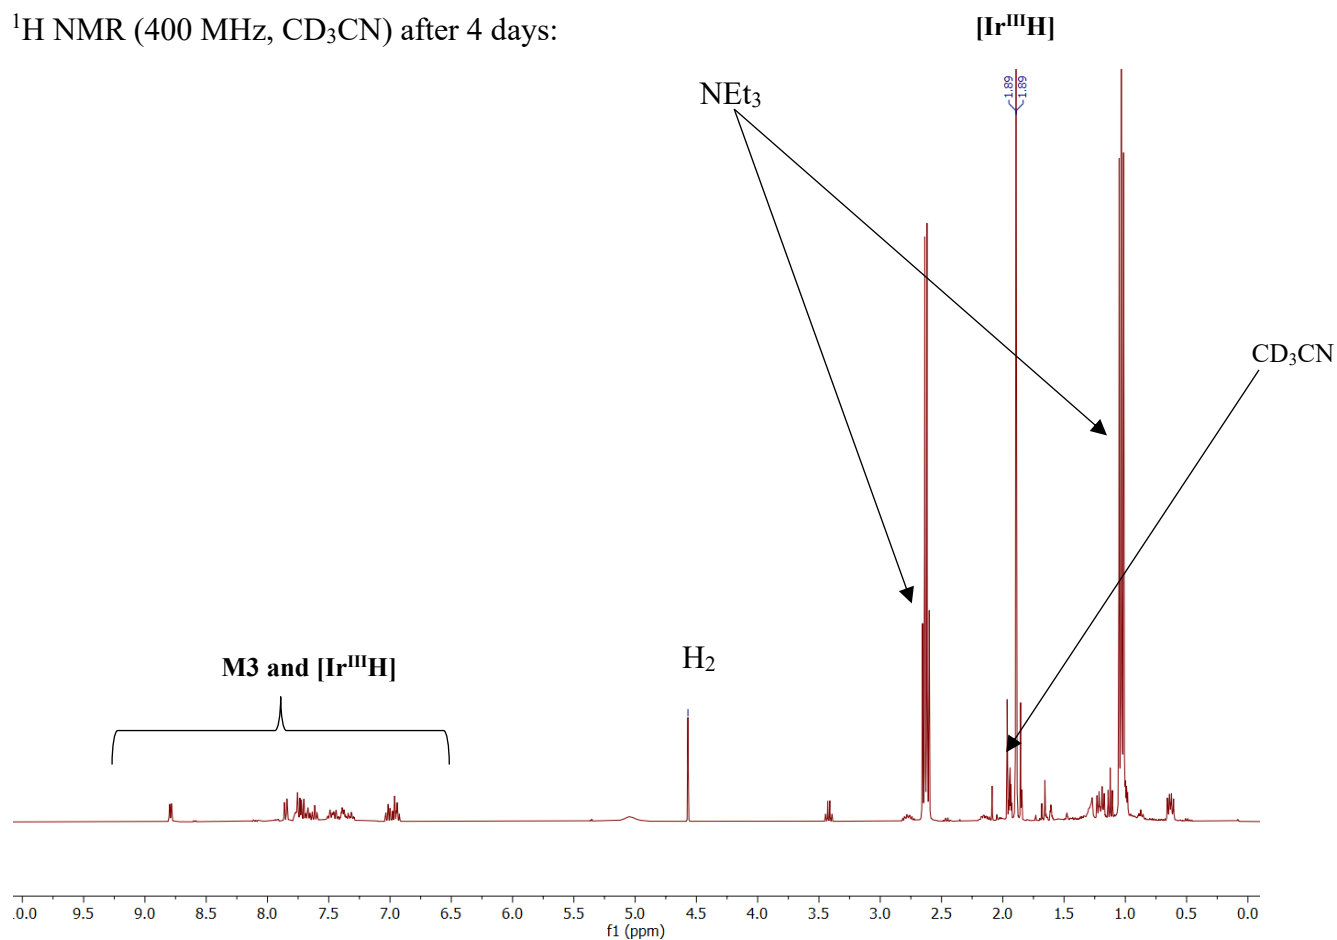

$^{31}\text{P}\{^1\text{H}\}$  NMR (162 MHz,  $\text{CD}_3\text{CN}$ ) after 4 days:

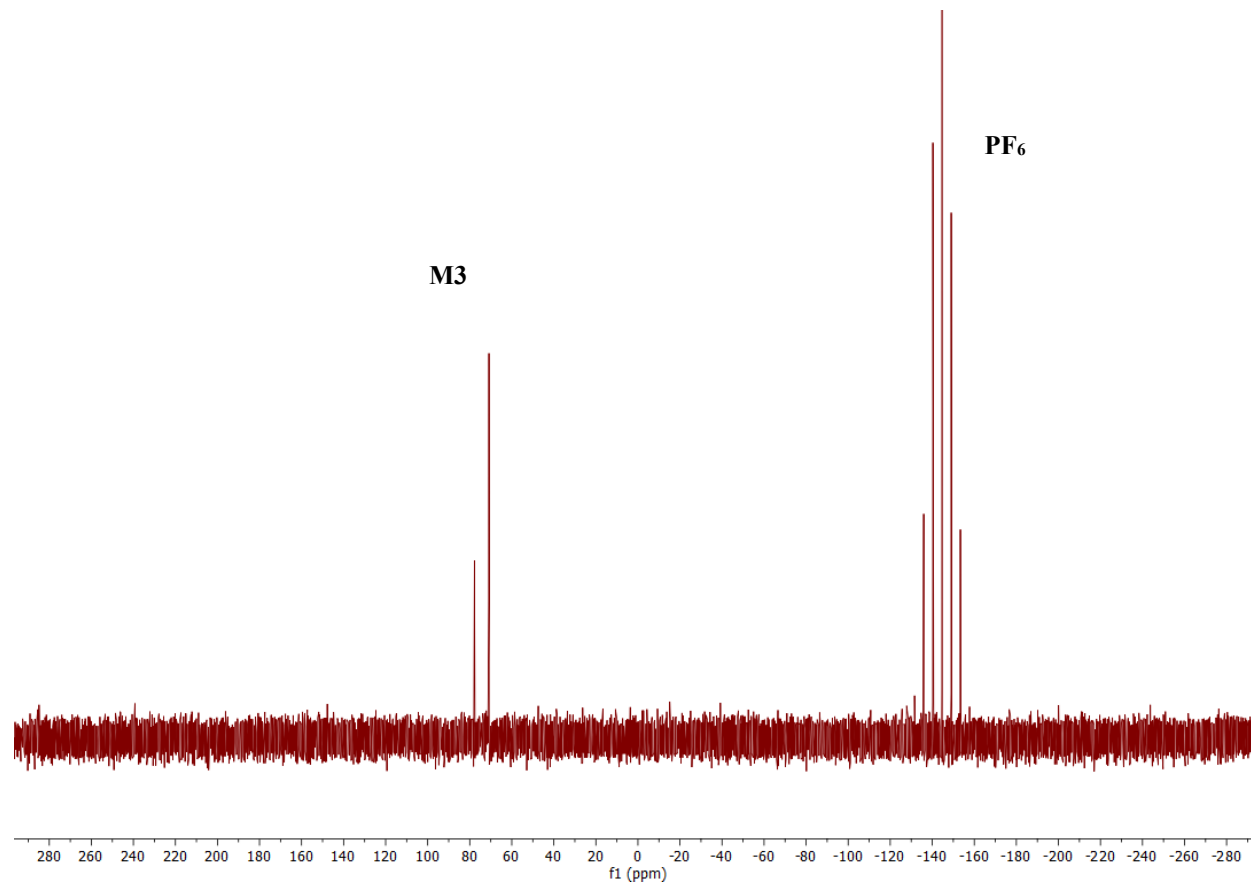

## 6. $^1\text{H}$ , $^{31}\text{P}\{^1\text{H}\}$ , $^{13}\text{C}\{^1\text{H}\}$ and $^{19}\text{F}\{^1\text{H}\}$ NMR spectra

### 6.1. **1**

$^1\text{H}$  NMR (400 MHz,  $\text{CD}_2\text{Cl}_2$ )

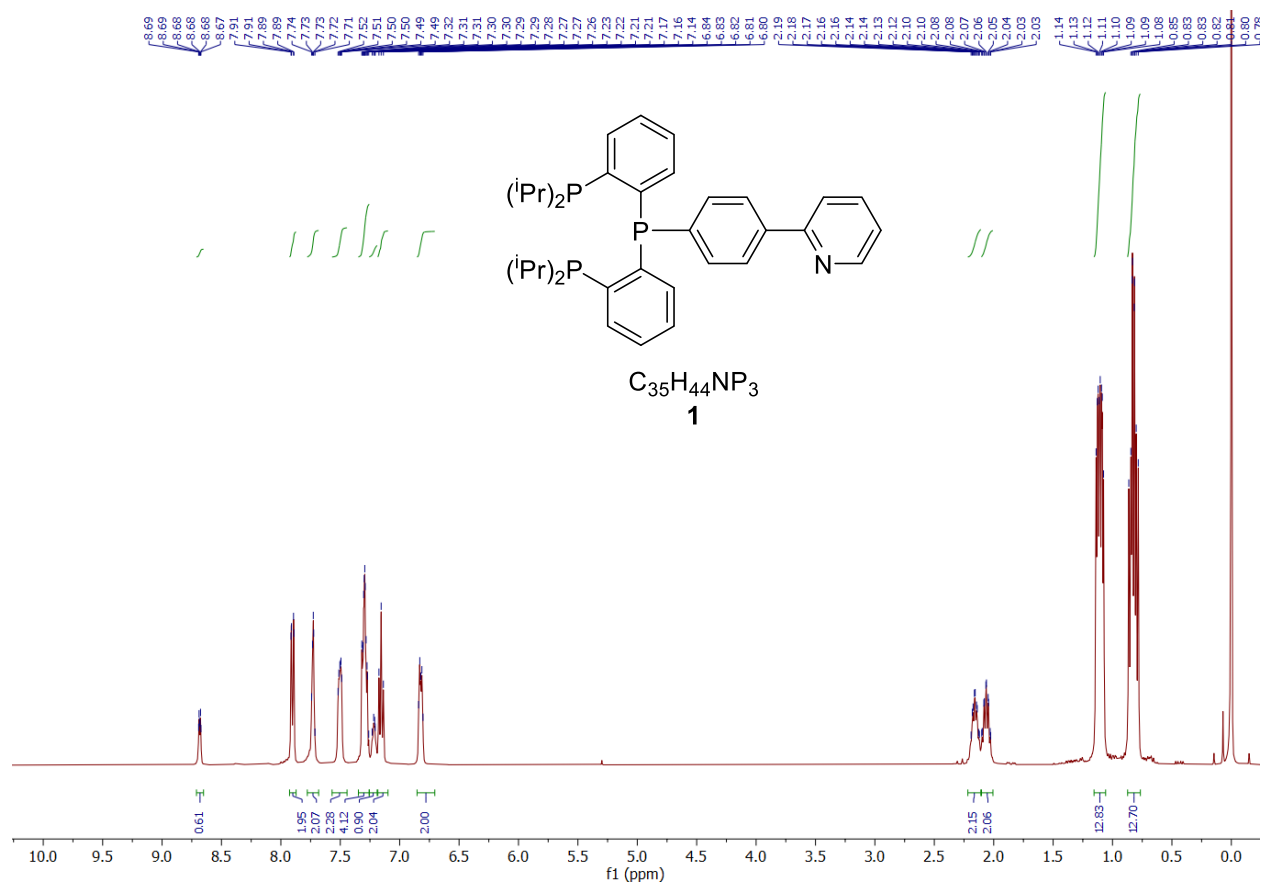

$^{31}\text{P}\{^1\text{H}\}$  NMR (162 MHz,  $\text{CD}_2\text{Cl}_2$ )

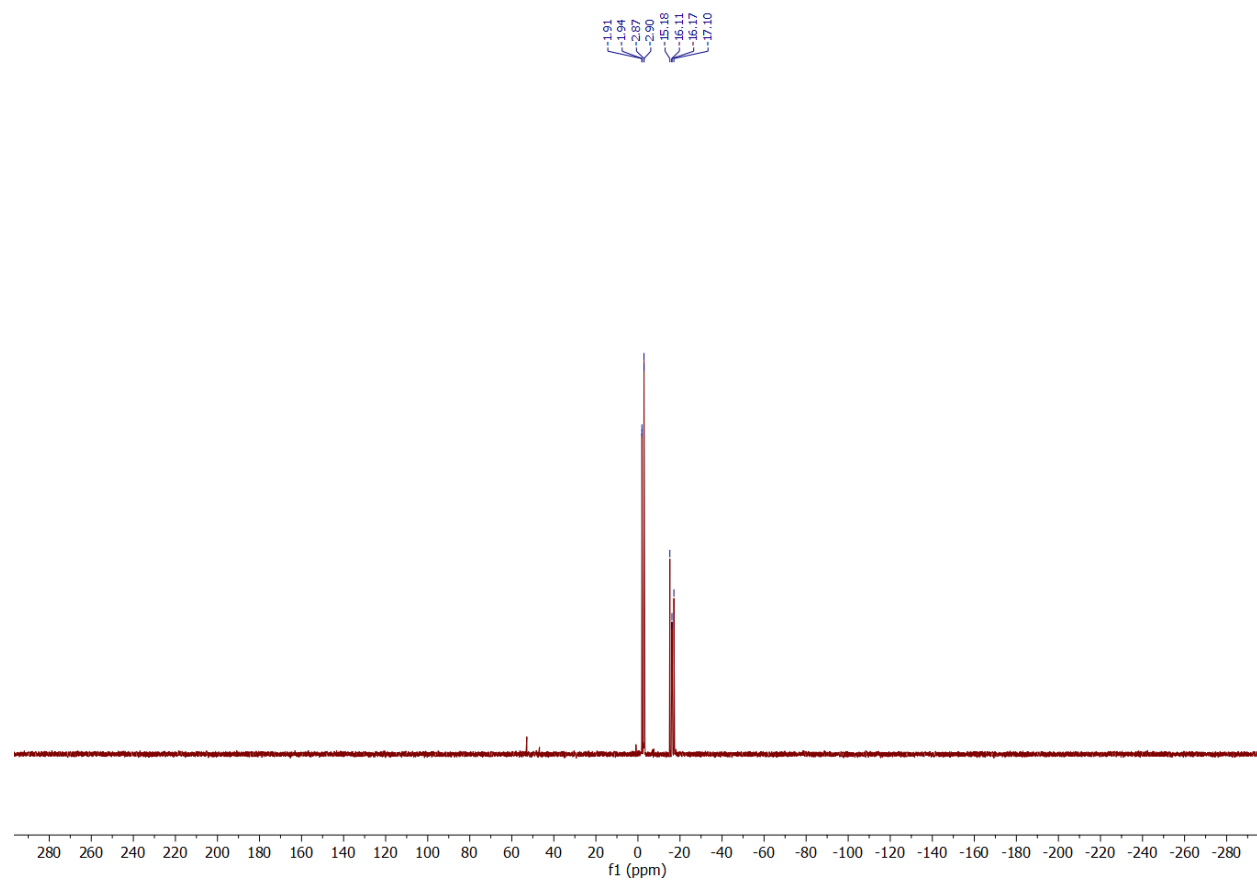

$^{13}\text{C}\{^1\text{H}\}$  NMR (100 MHz,  $\text{CD}_2\text{Cl}_2$ )

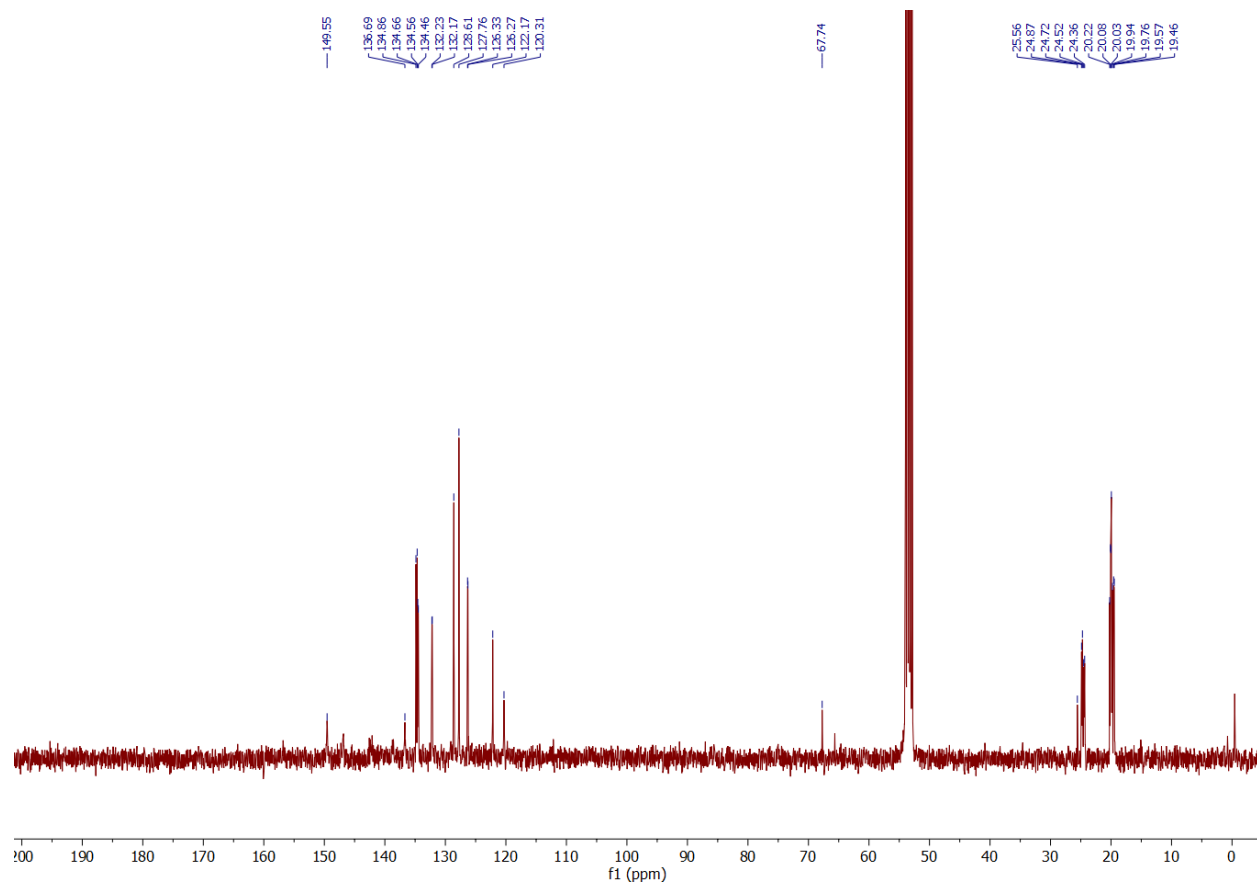

### 6.3. M3

$^1\text{H}$  NMR (400 MHz,  $\text{CD}_2\text{Cl}_2$ )

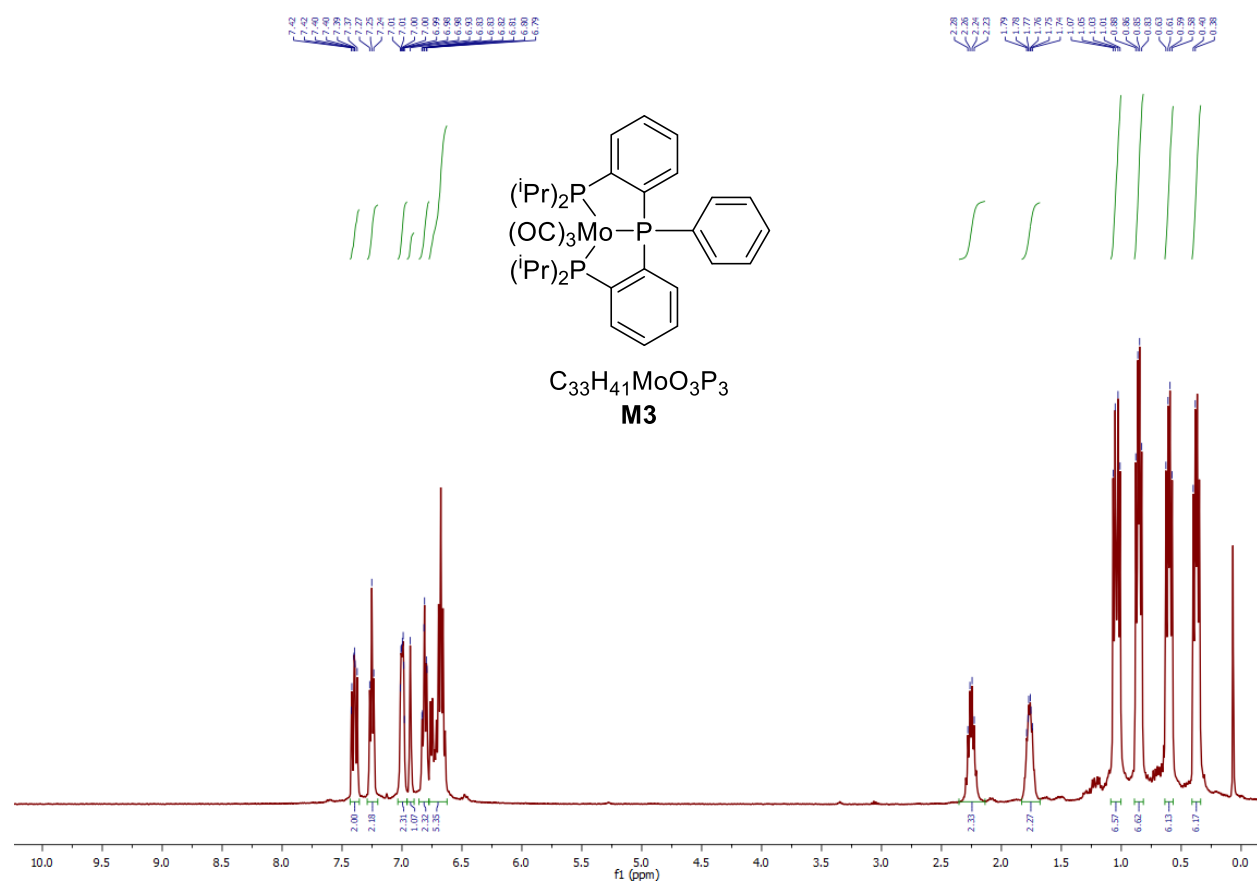



$^{31}\text{P}\{^1\text{H}\}$  NMR (162 MHz,  $\text{CD}_2\text{Cl}_2$ )

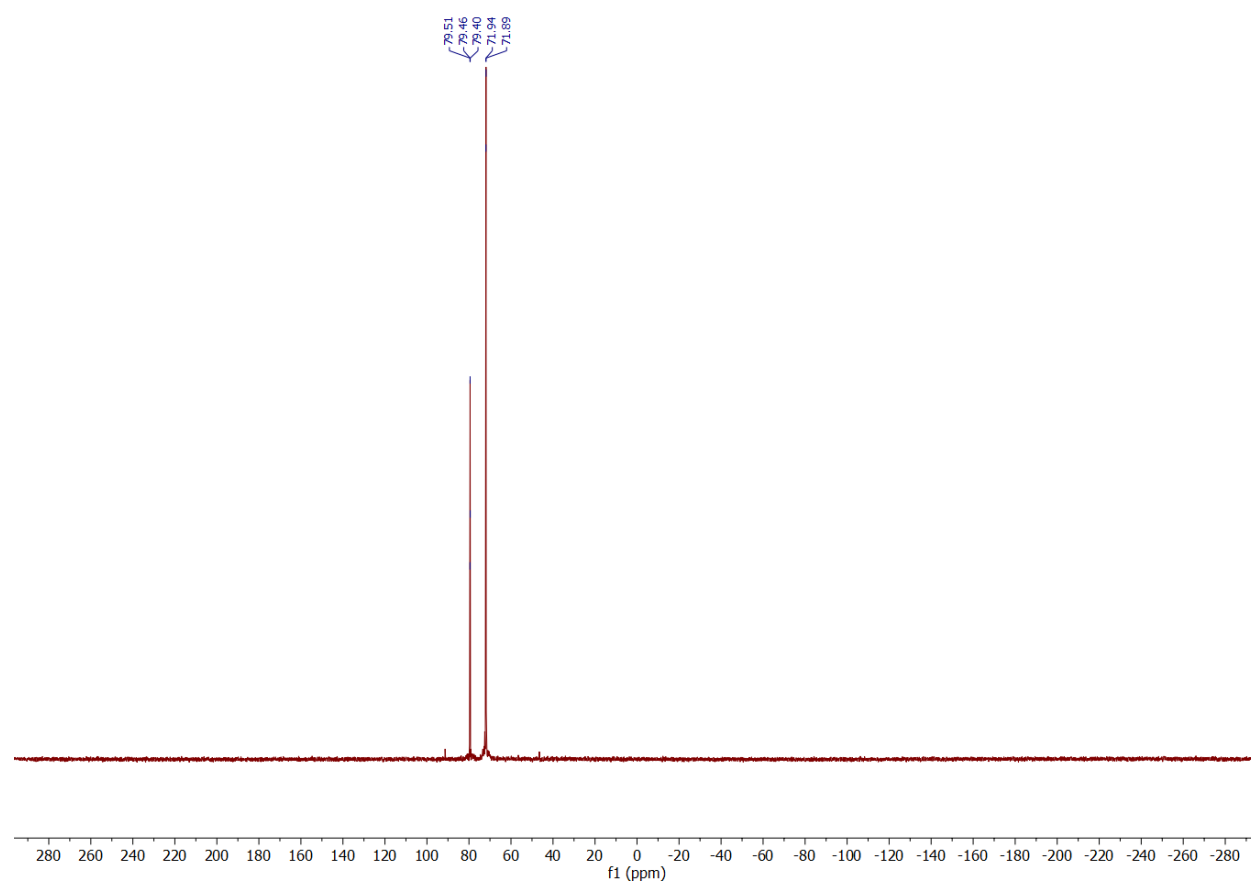

$^{13}\text{C}\{^1\text{H}\}$  NMR (100 MHz,  $\text{CD}_2\text{Cl}_2$ )

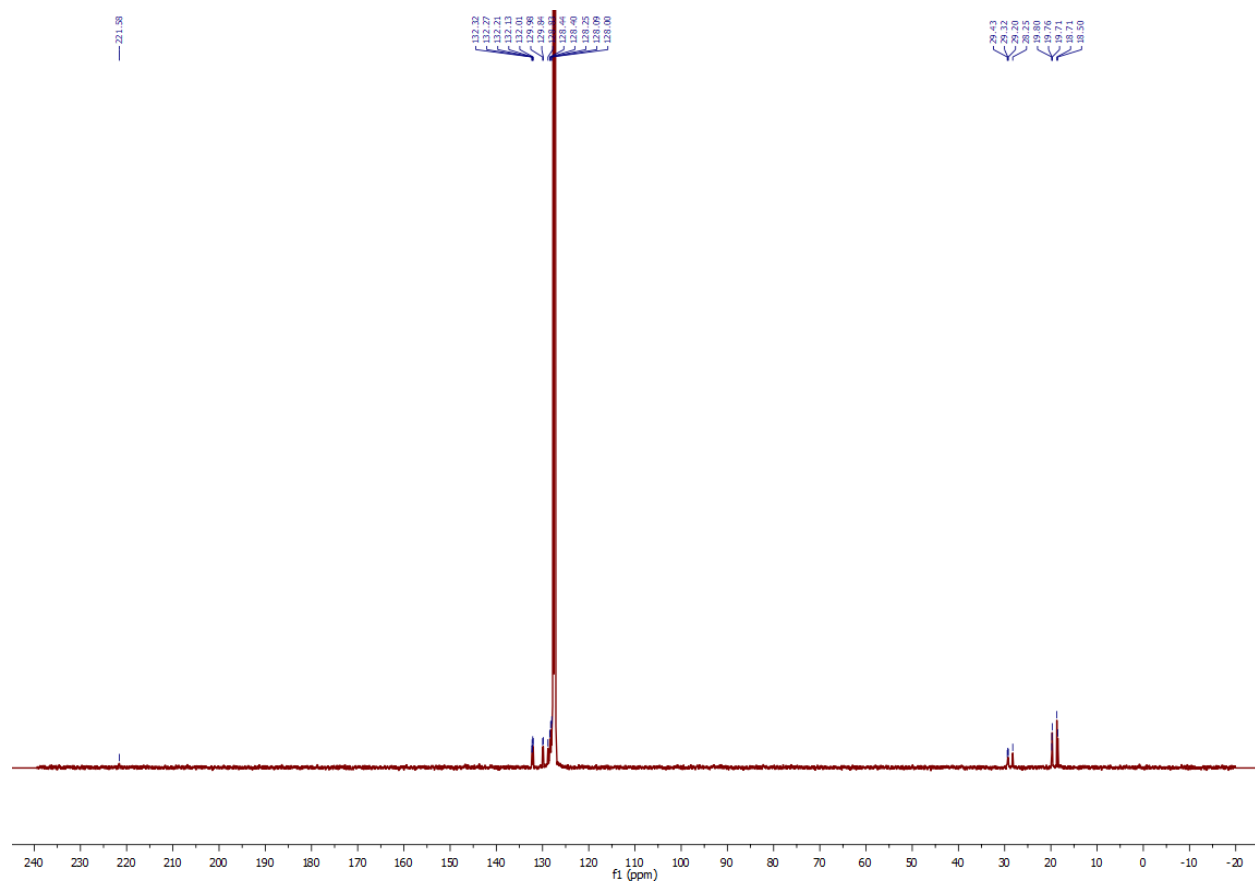

# 6.4. 2

$^1\text{H}$  NMR (400 MHz,  $\text{C}_6\text{D}_6$ )

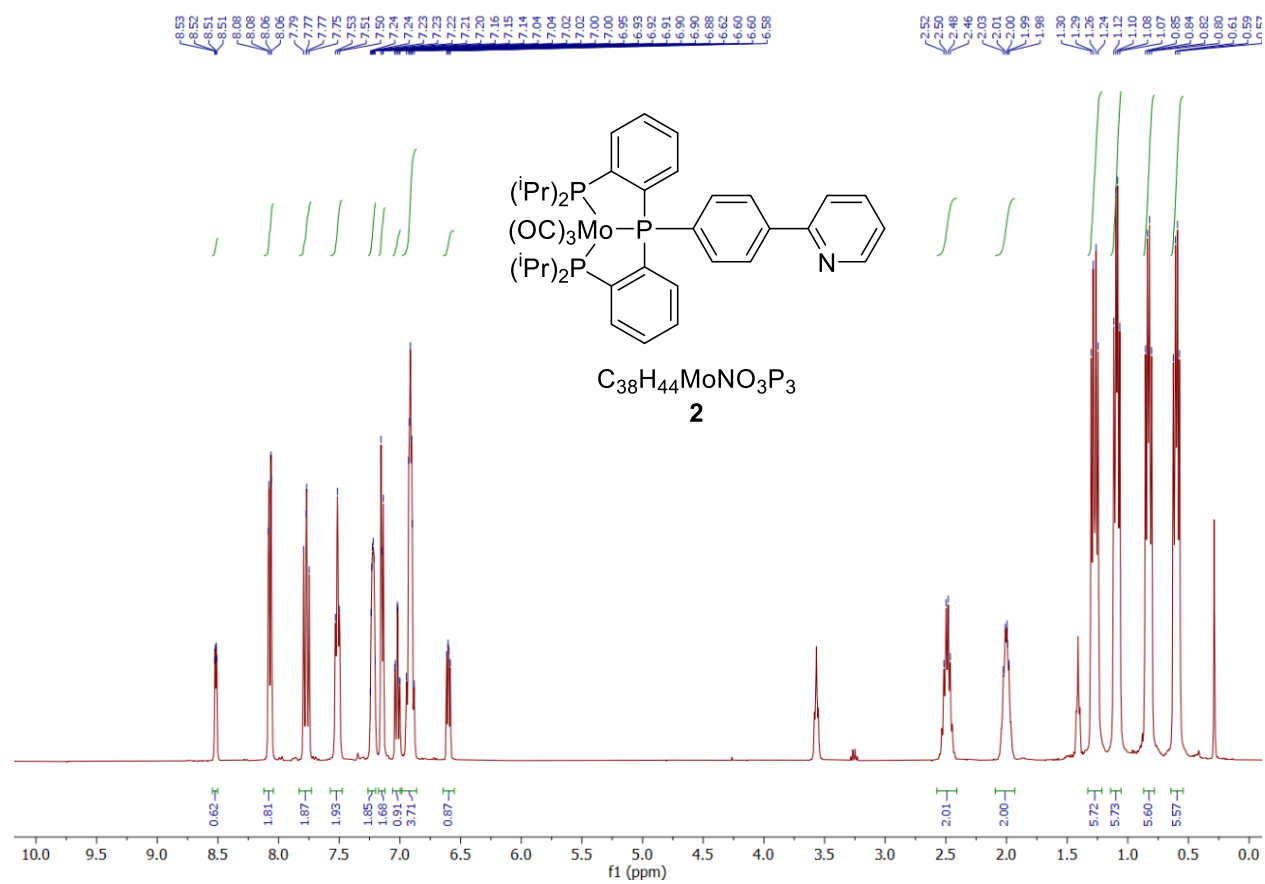

$^{31}\text{P}\{^1\text{H}\}$  NMR (162 MHz,  $\text{C}_6\text{D}_6$ )

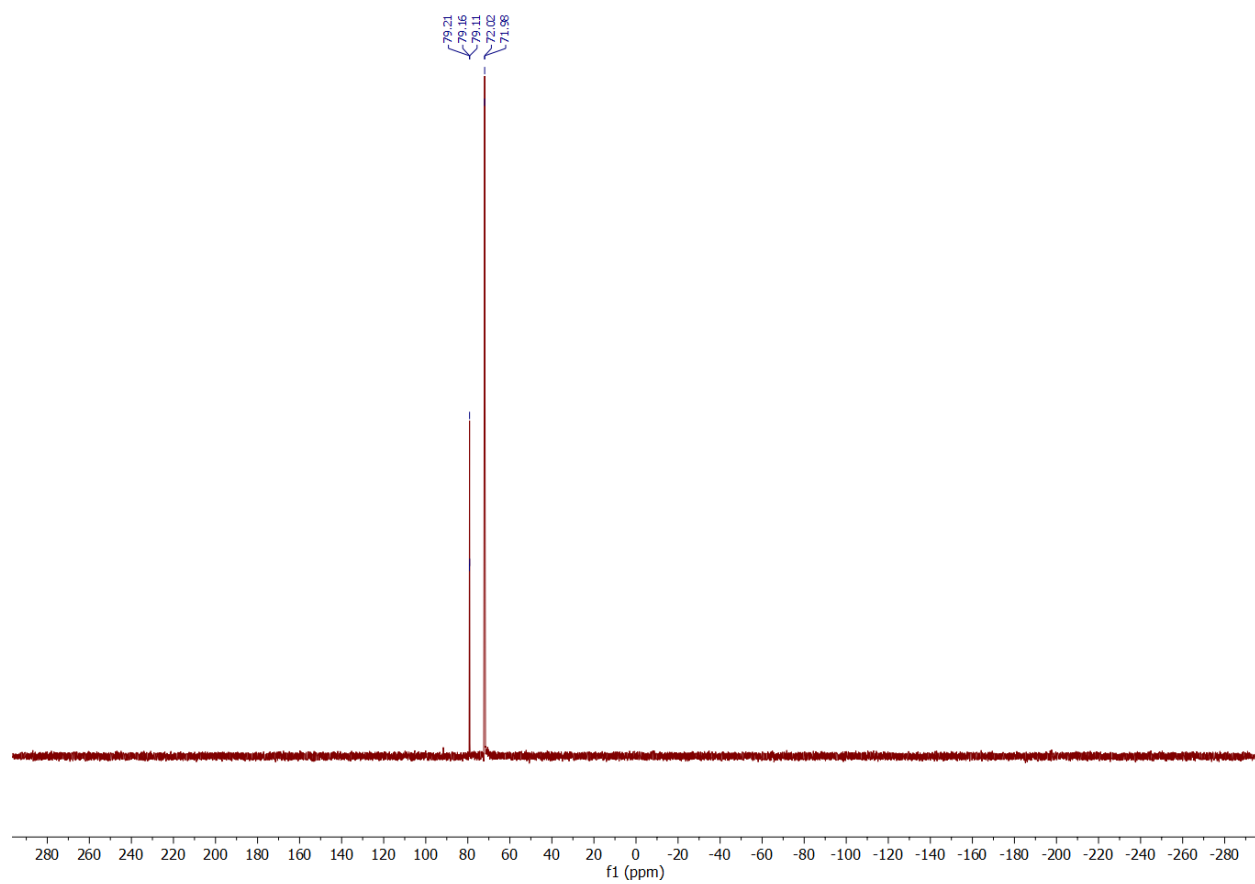

$^{13}\text{C}\{^1\text{H}\}$  NMR (100 MHz,  $\text{C}_6\text{D}_6$ )

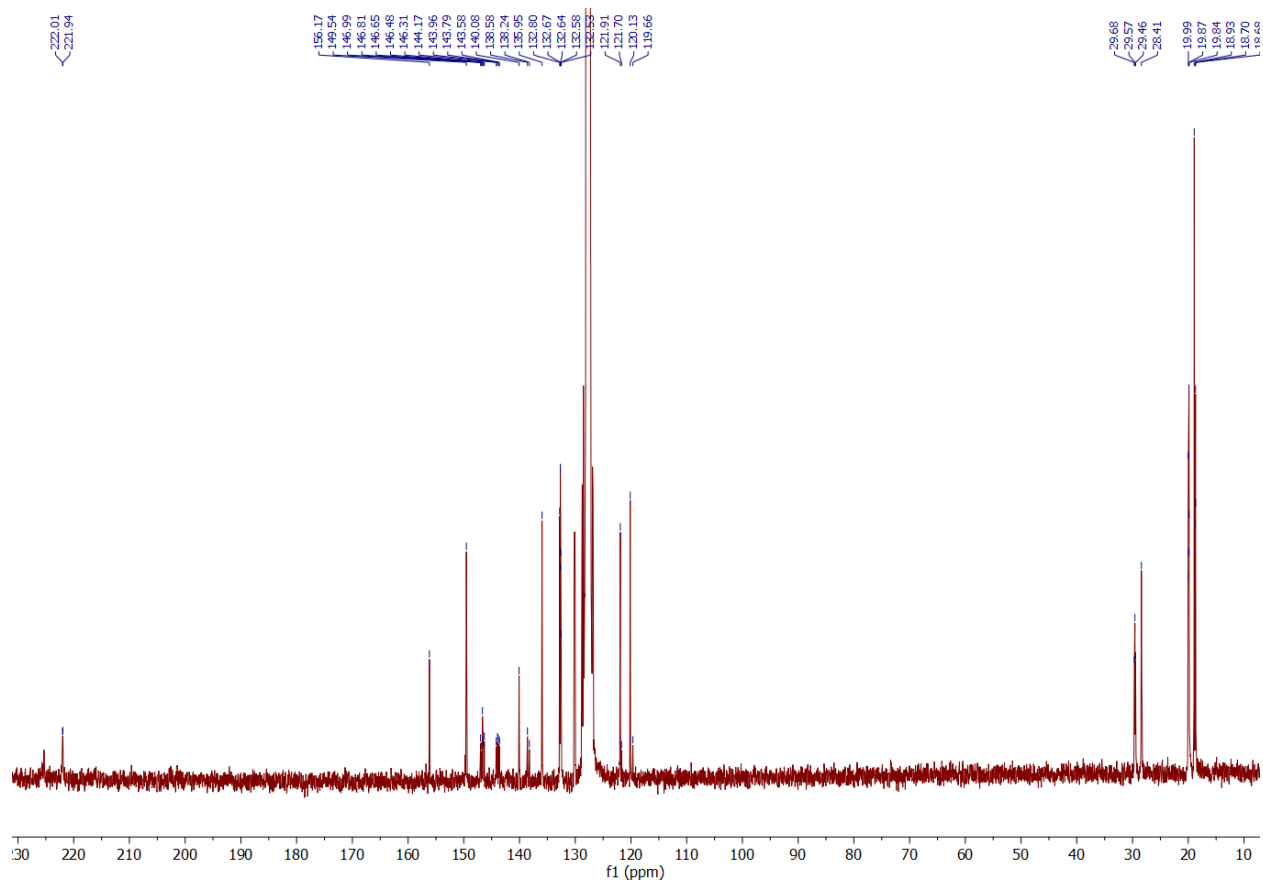

## 6.5. [Mo(CO)<sub>3</sub>;RhCl] (3)

<sup>1</sup>H NMR (400 MHz, CD<sub>2</sub>Cl<sub>2</sub>)

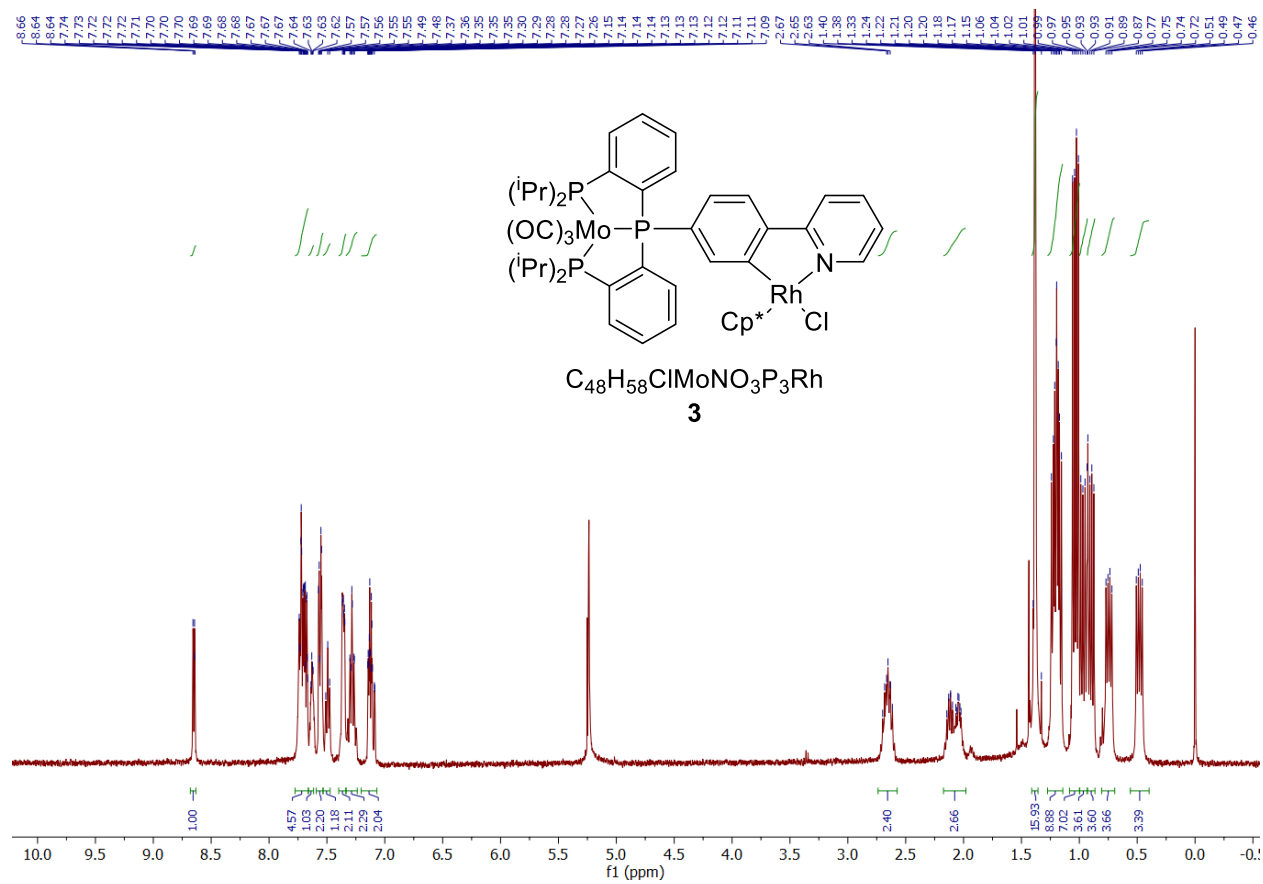

$^{31}\text{P}\{^1\text{H}\}$  NMR (162 MHz,  $\text{CD}_2\text{Cl}_2$ )

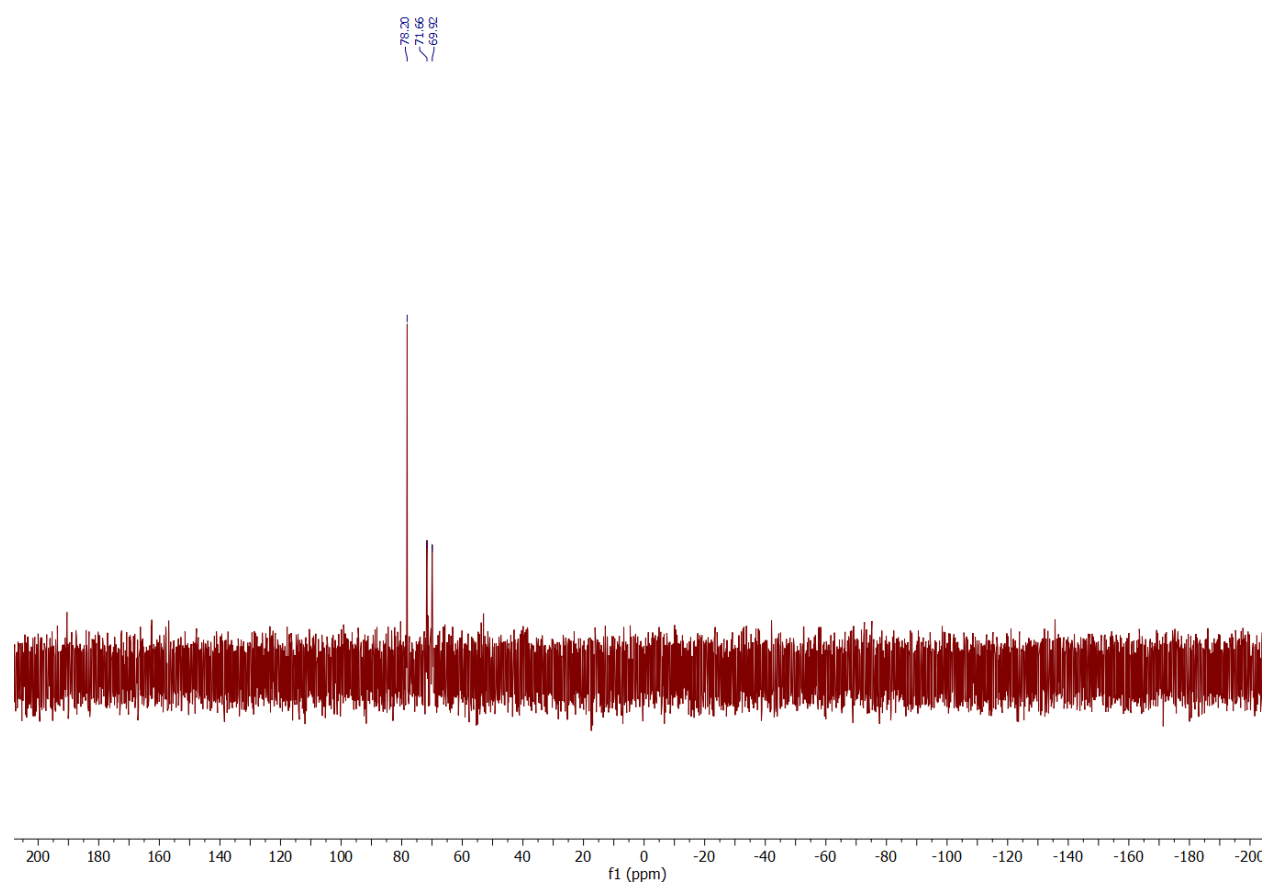

$^{13}\text{C}\{^1\text{H}\}$  NMR (100 MHz,  $\text{CD}_2\text{Cl}_2$ )

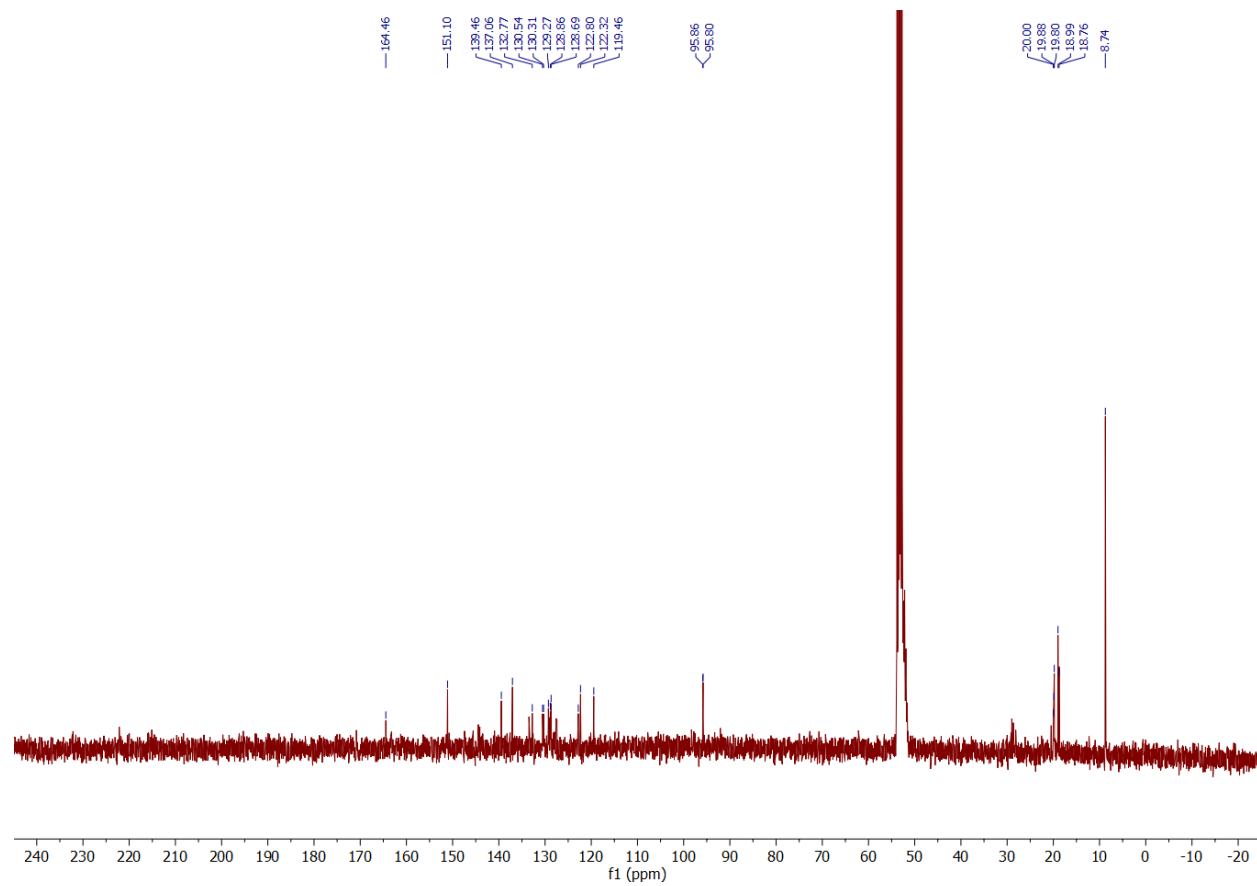



## 6.6. [Mo(CO)<sub>3</sub>IrCl] (4)

<sup>1</sup>H NMR (400 MHz, CD<sub>2</sub>Cl<sub>2</sub>)

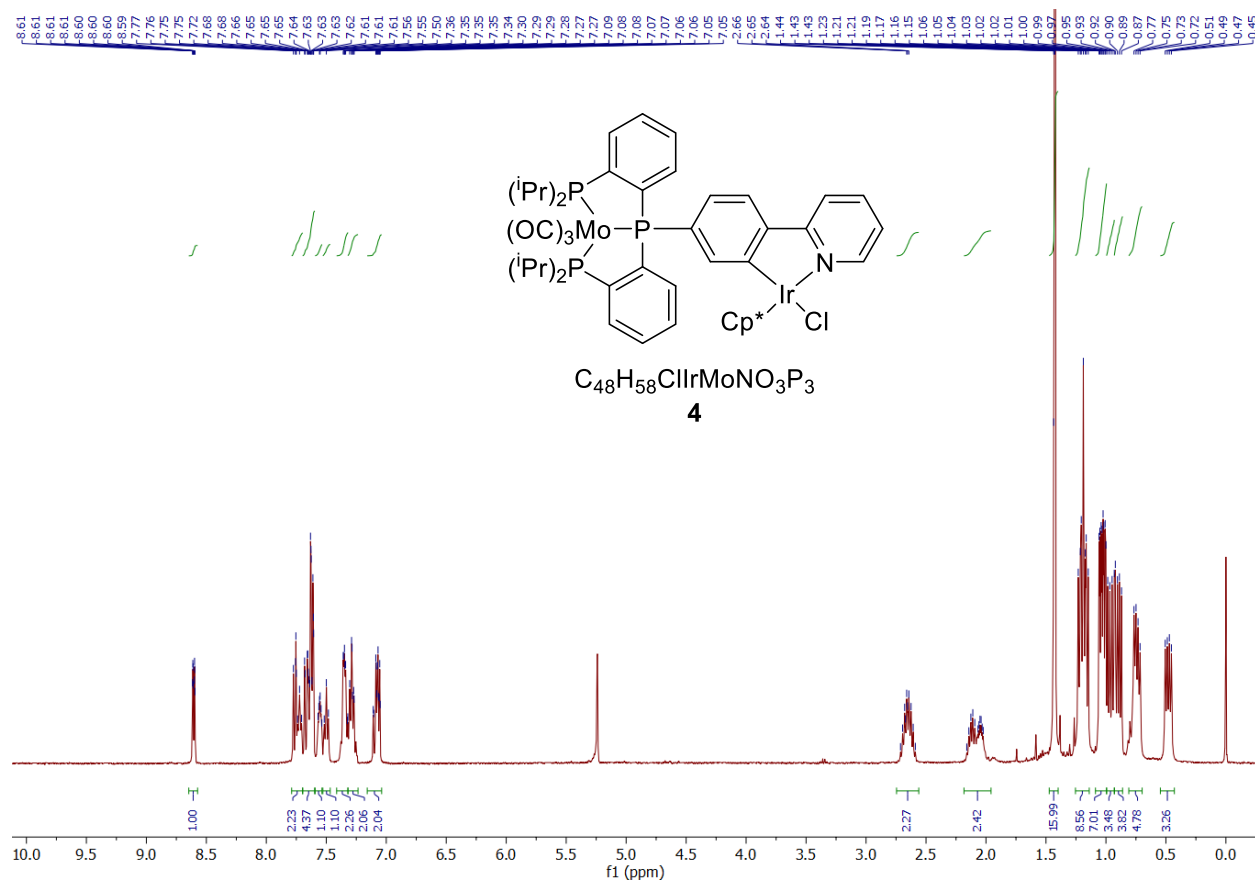

$^{31}\text{P}\{^1\text{H}\}$  NMR (162 MHz,  $\text{CD}_2\text{Cl}_2$ )

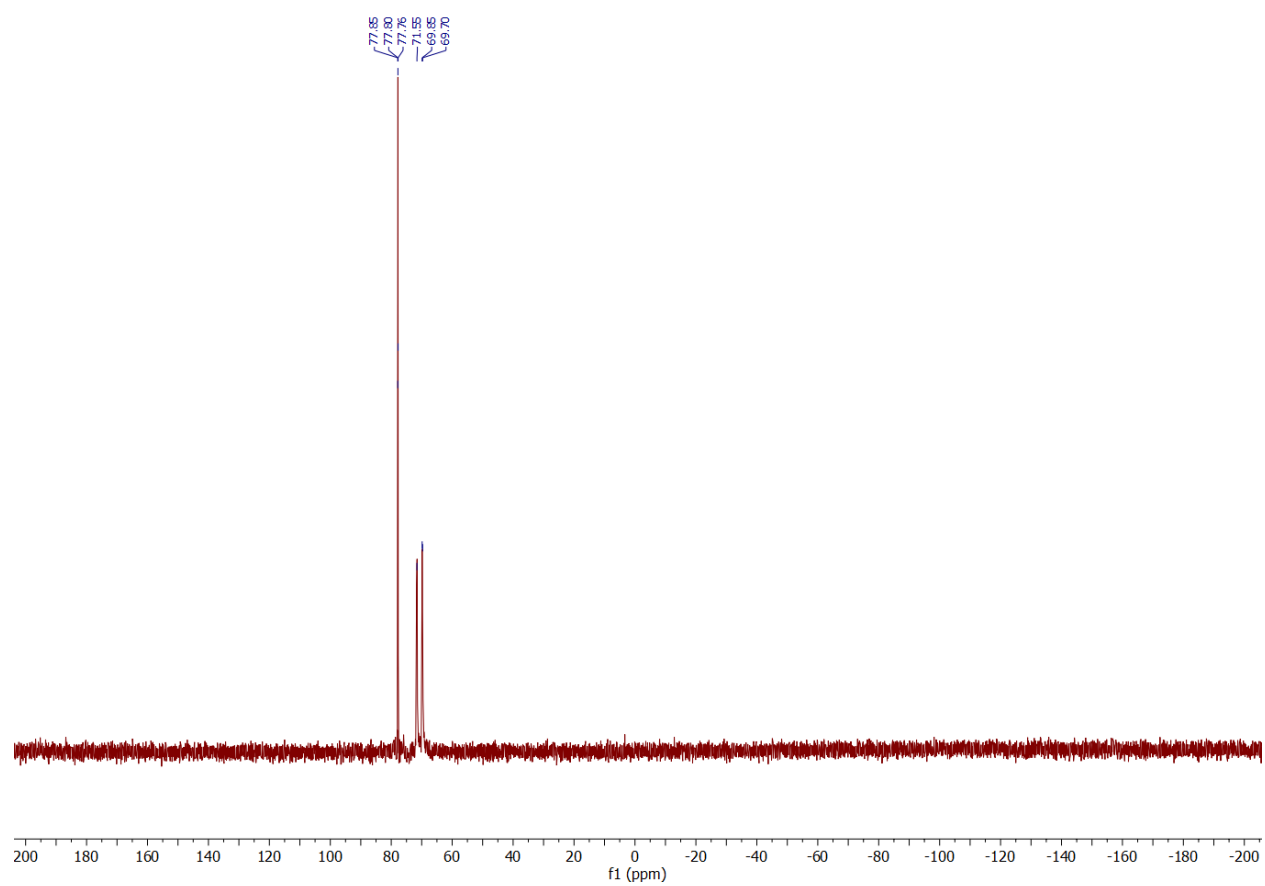

$^{13}\text{C}\{^1\text{H}\}$  NMR (100 MHz,  $\text{CD}_2\text{Cl}_2$ )

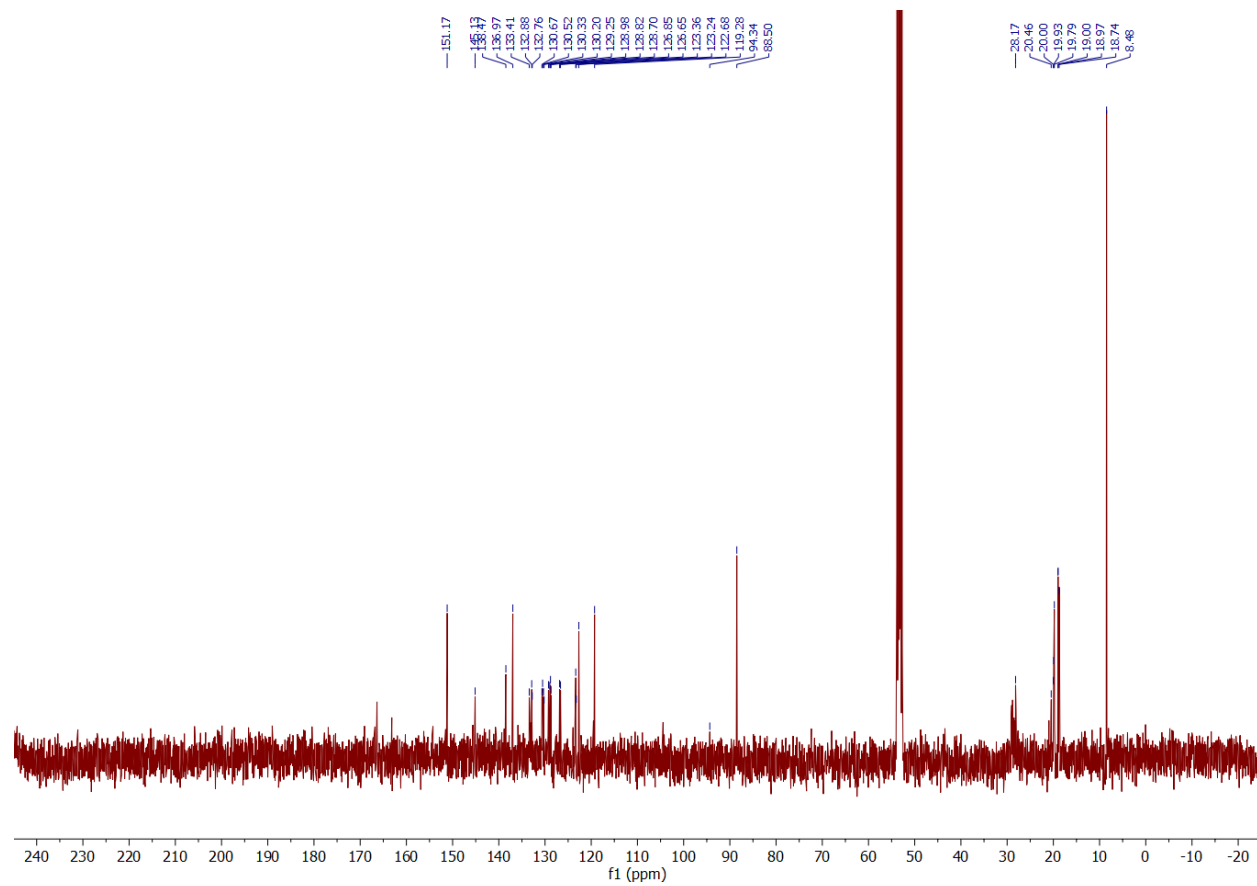

## 6.7. C2

$^1\text{H}$  NMR (400 MHz,  $\text{CD}_3\text{CN}$ )

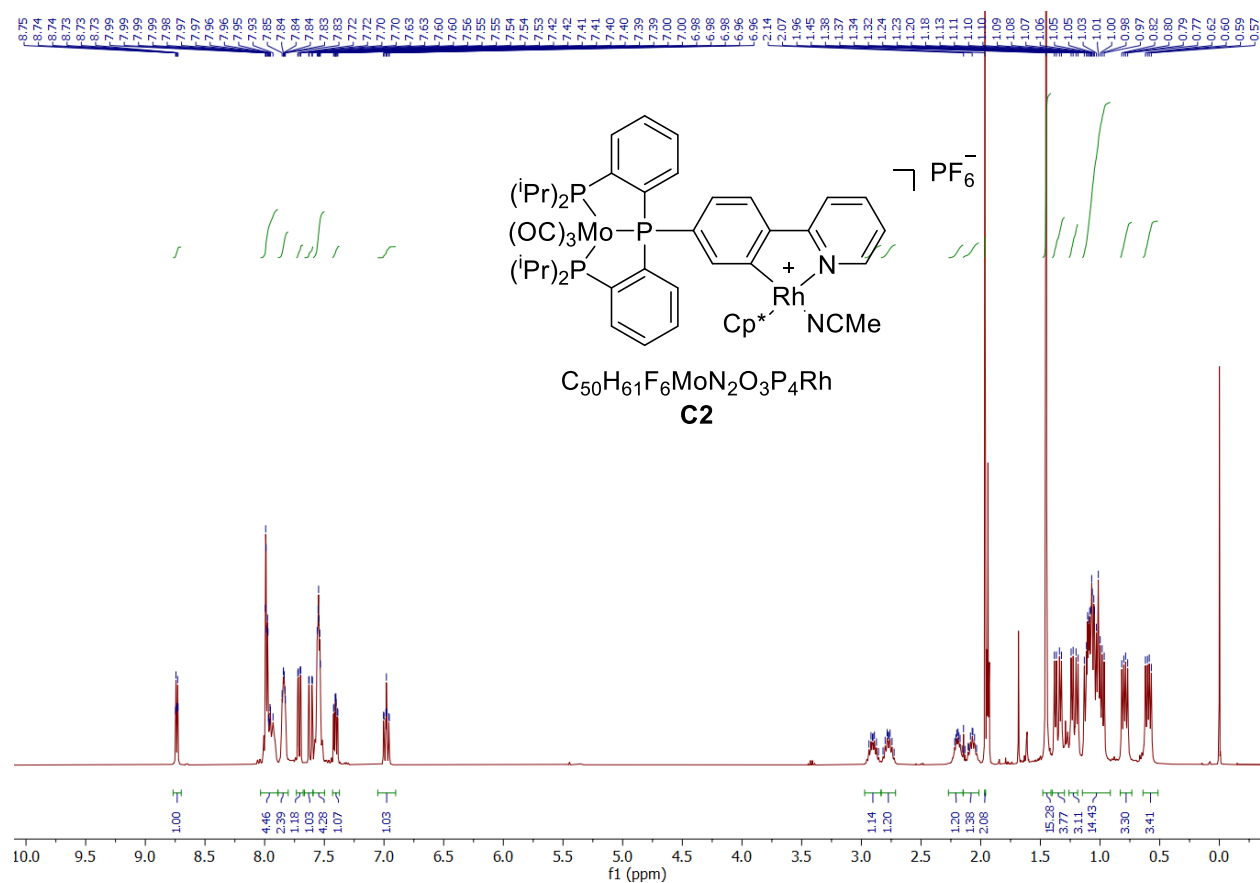

$^{31}\text{P}\{^1\text{H}\}$  NMR (162 MHz,  $\text{CD}_3\text{CN}$ )

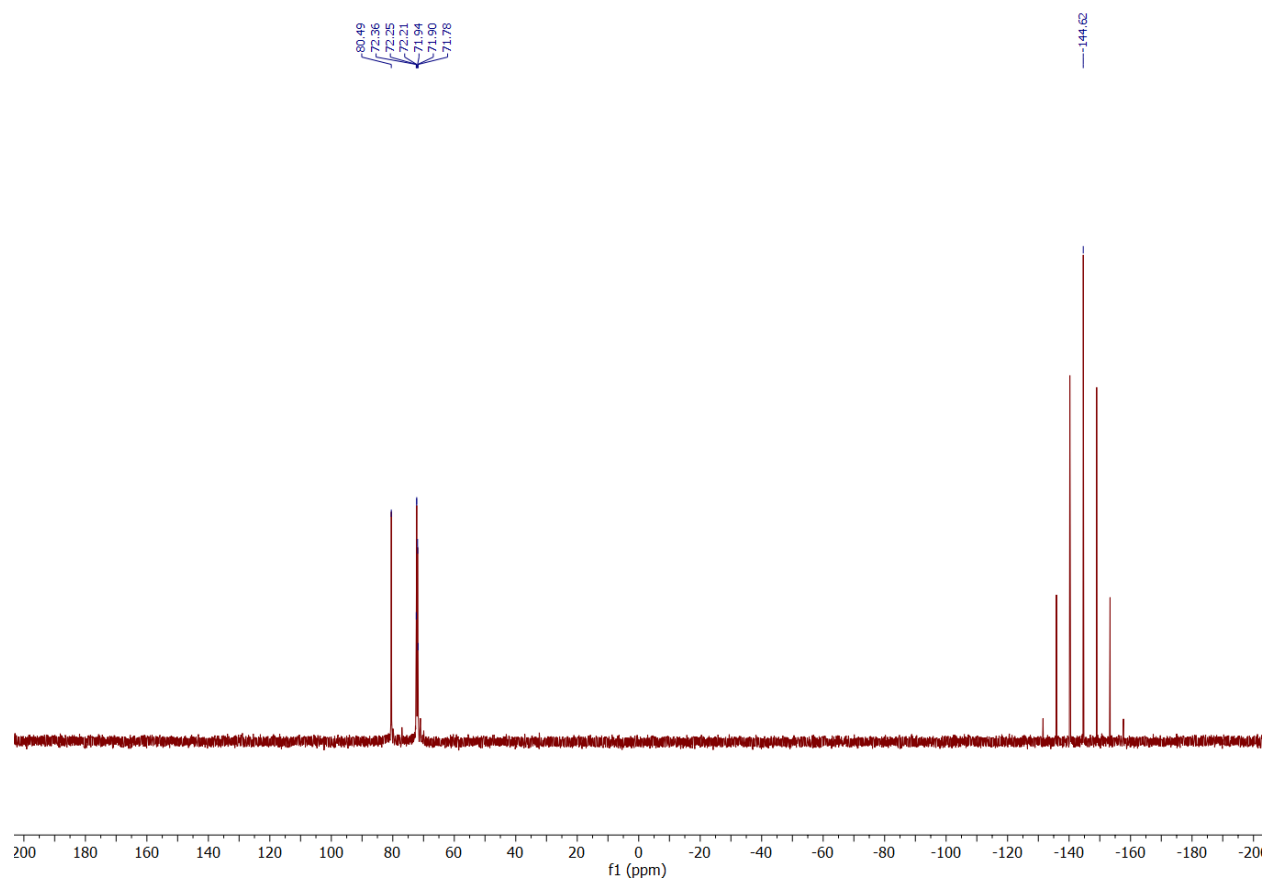

$^{13}\text{C}\{^1\text{H}\}$  NMR (100 MHz,  $\text{CD}_3\text{CN}$ )

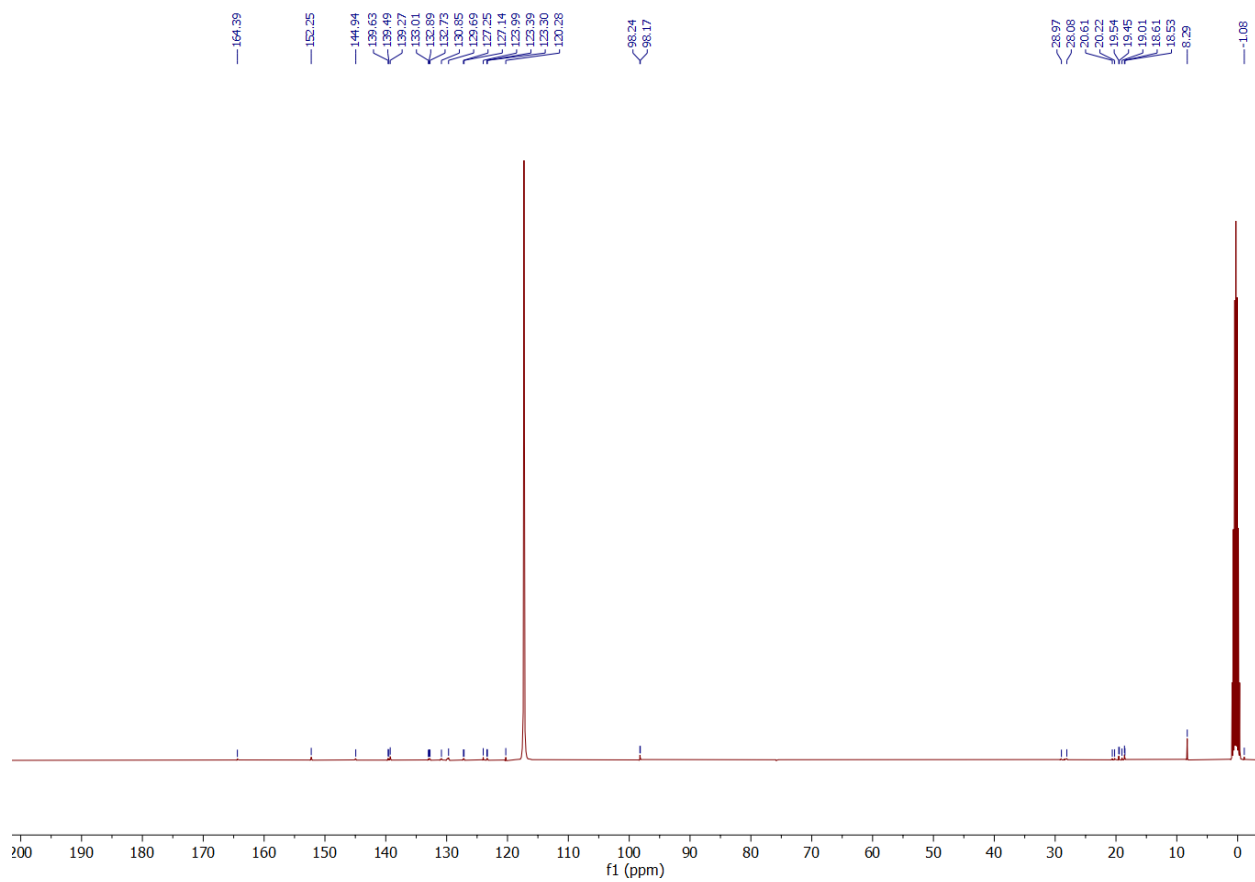

$^{19}\text{F}\{^1\text{H}\}$  NMR (376 MHz,  $\text{CD}_3\text{CN}$ )

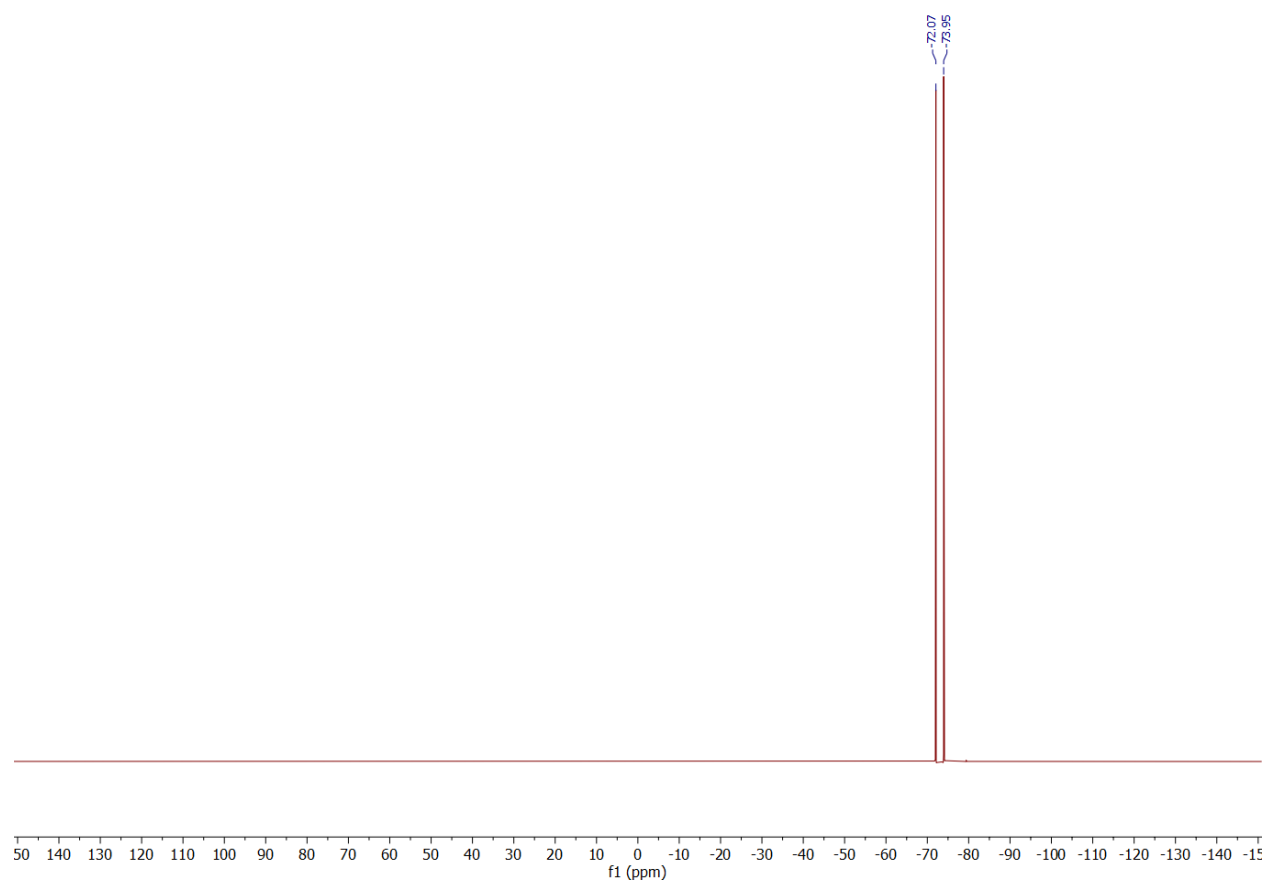

## 6.8. C1

$^1\text{H}$  NMR (400 MHz,  $\text{CD}_3\text{CN}$ )

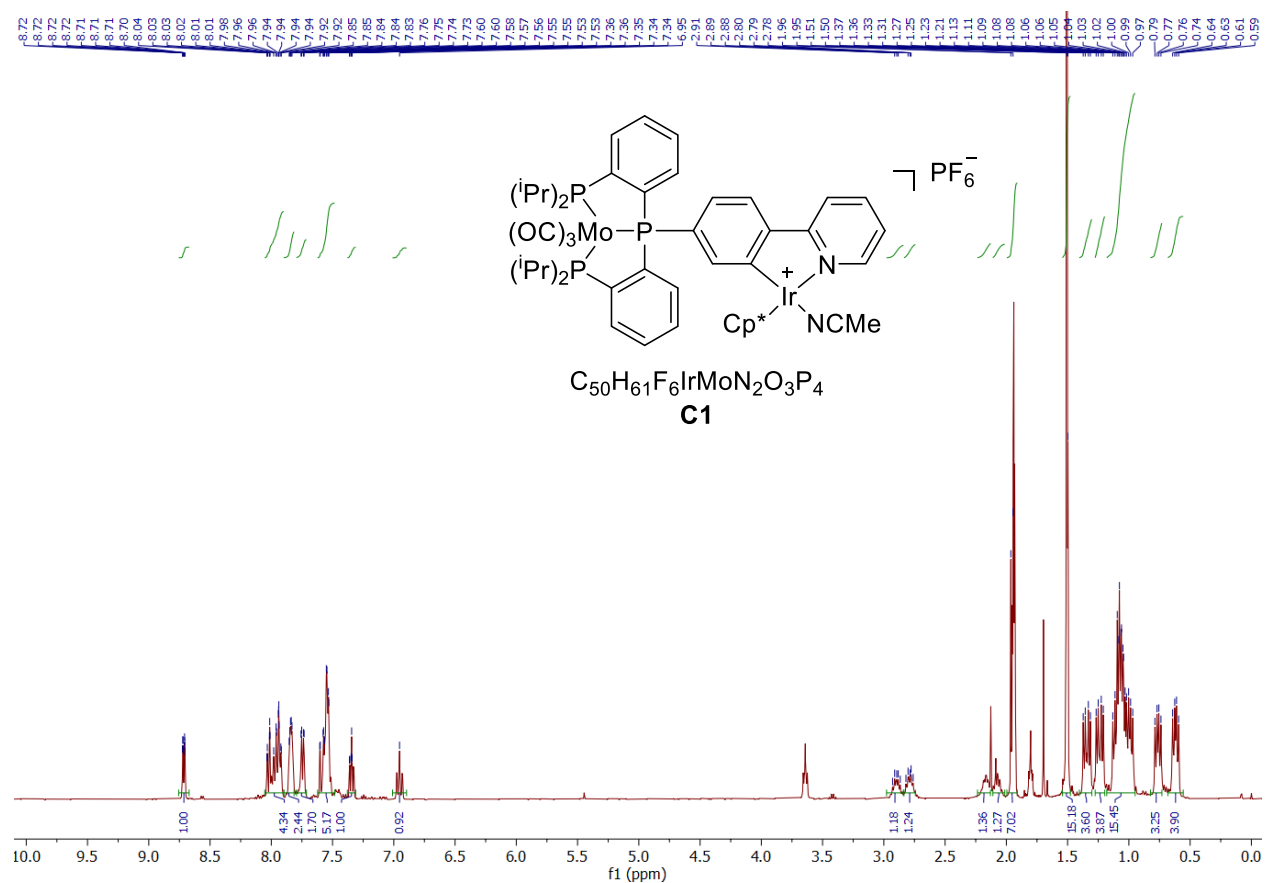



$^{31}\text{P}\{^1\text{H}\}$  NMR (162 MHz,  $\text{CD}_3\text{CN}$ )

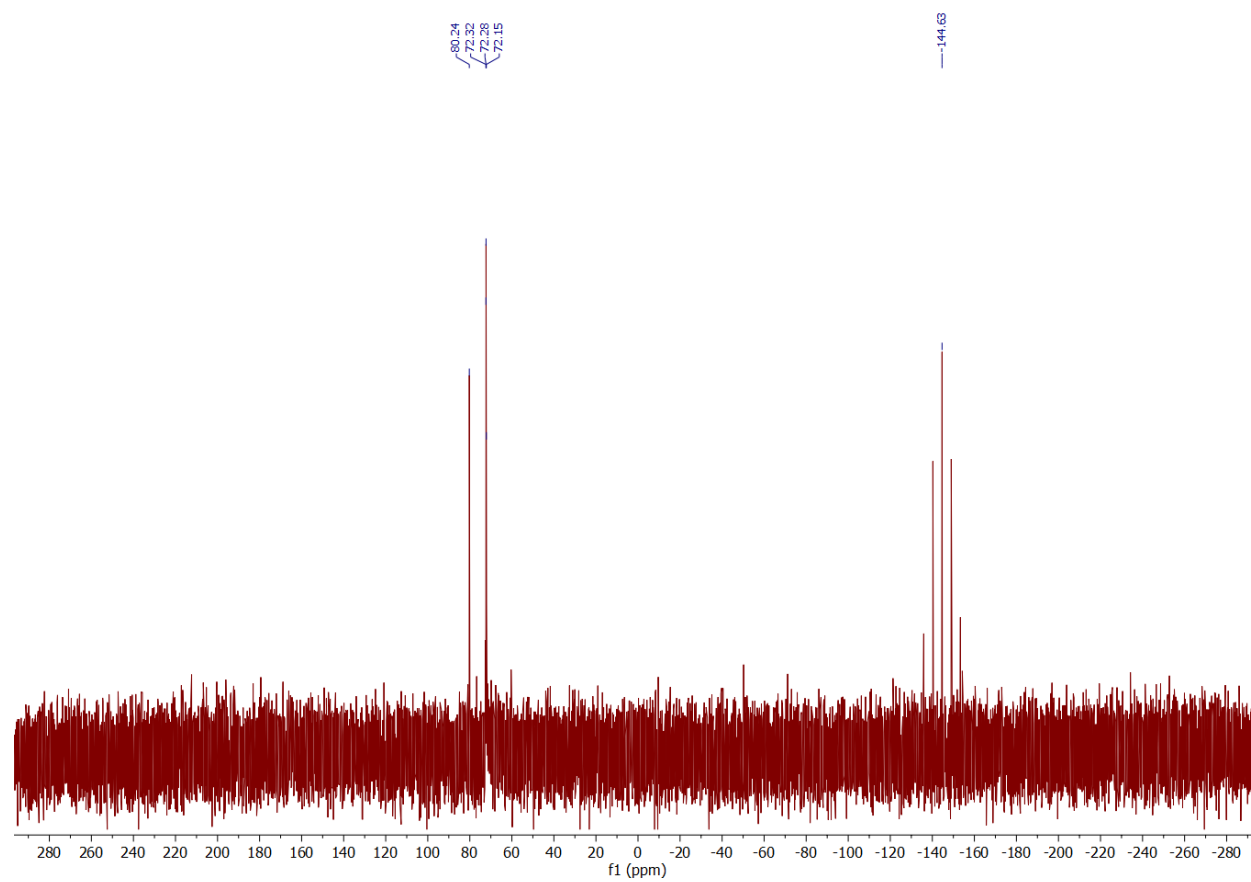

$^{13}\text{C}\{^1\text{H}\}$  NMR (100 MHz,  $\text{CD}_3\text{CN}$ )

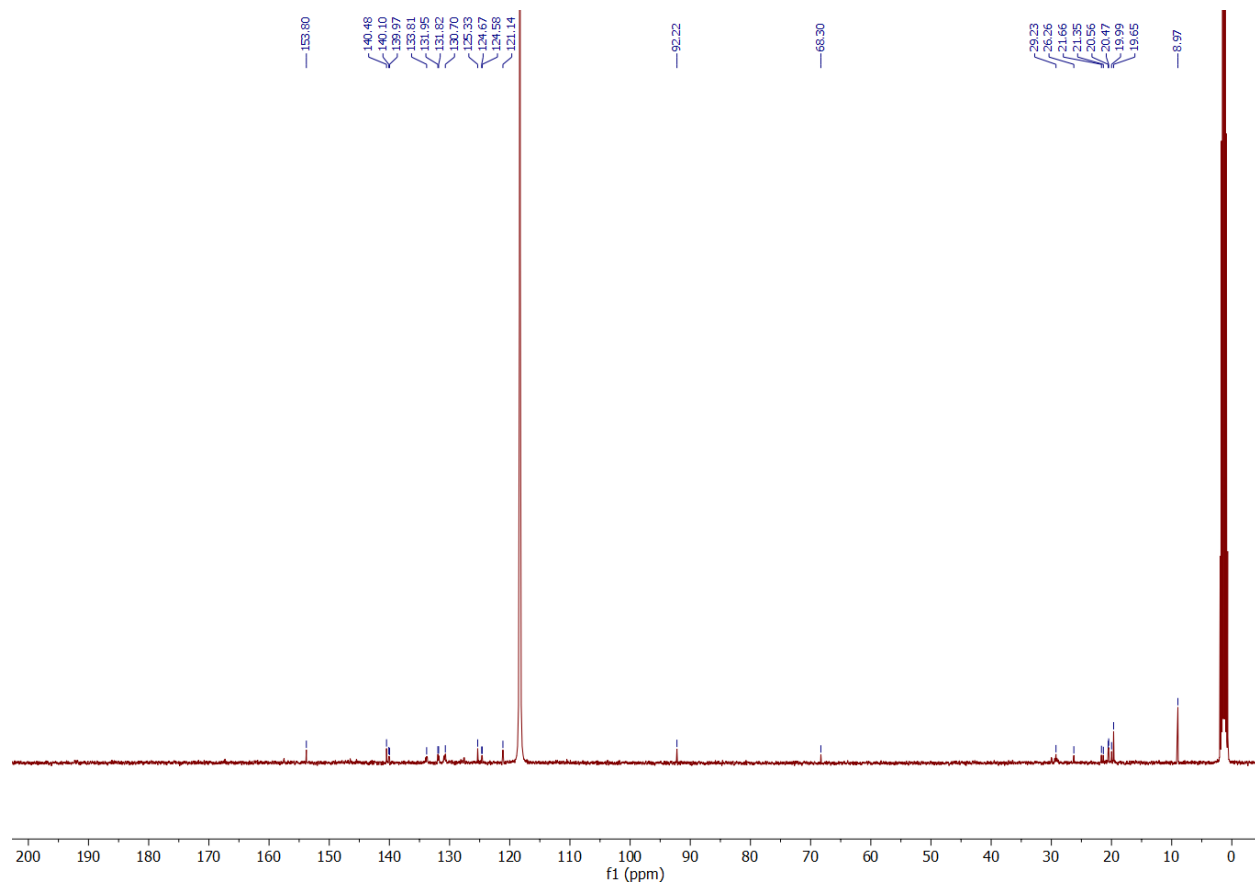

$^{19}\text{F}\{^1\text{H}\}$  NMR (376 MHz,  $\text{CD}_3\text{CN}$ )

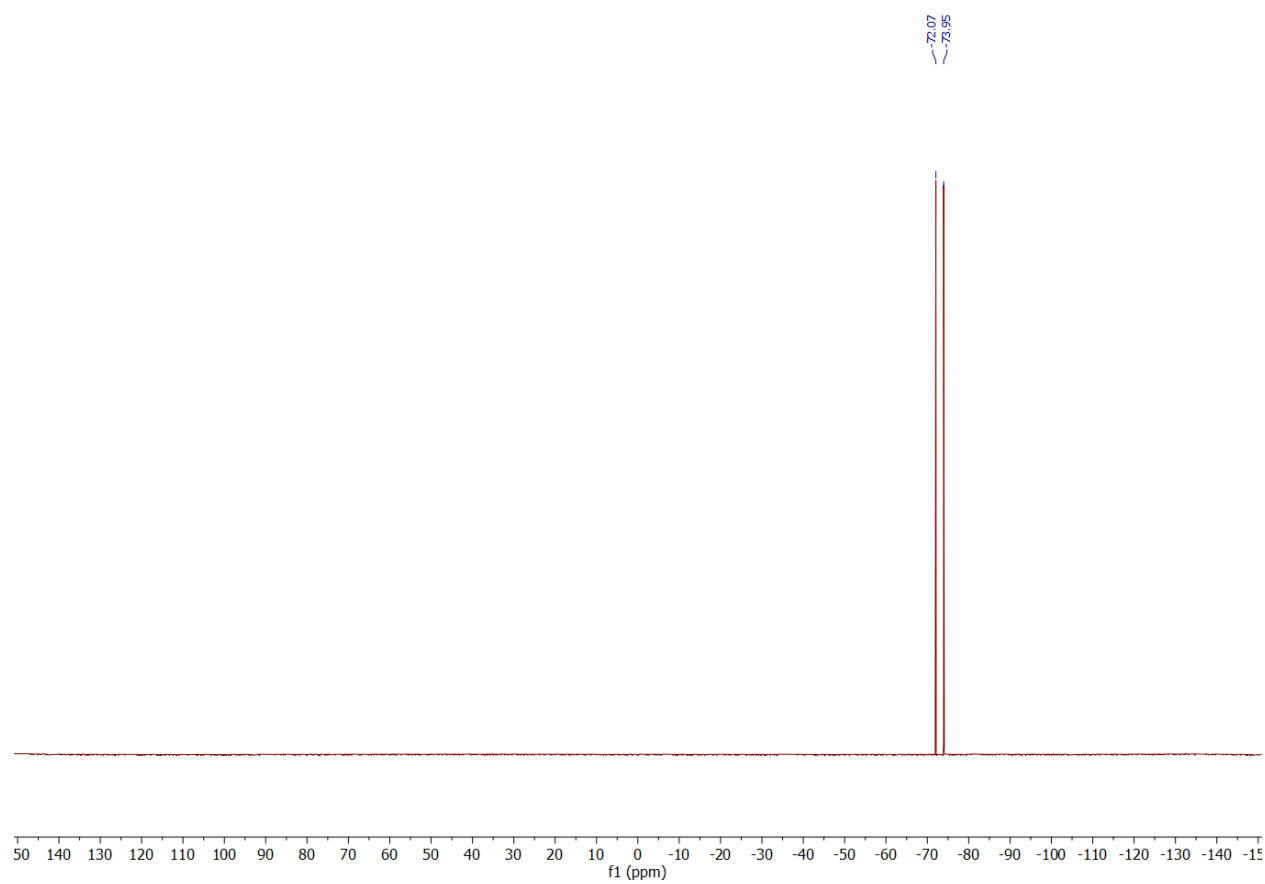

6.9. Representative  $^1\text{H}$  NMR spectrum (400 MHz,  $\text{D}_2\text{O}$ ) of catalytic trials

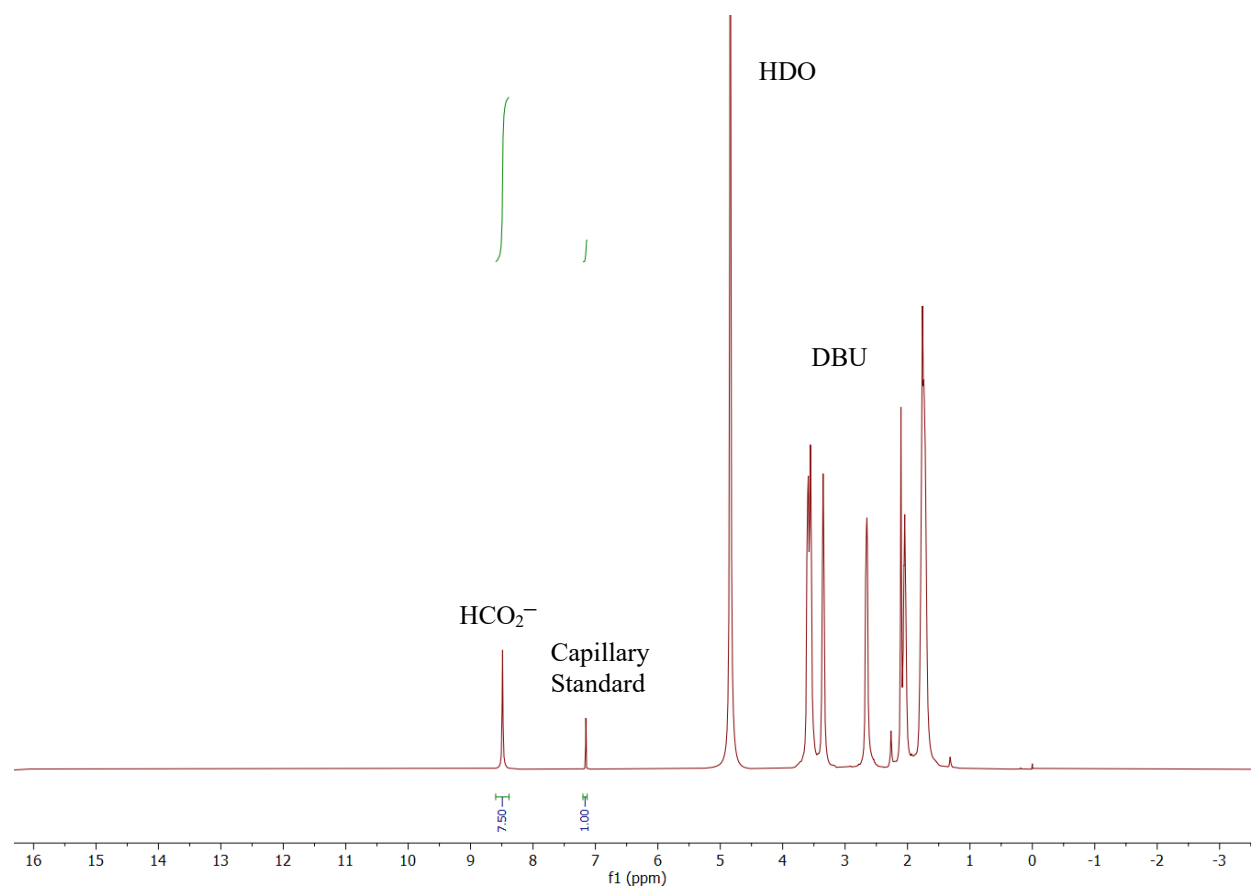

6.10.  $^1\text{H}$  NMR spectrum (400 MHz,  $\text{CD}_3\text{CN}$ ) of hydricity measurement of  $[\text{Ir}^{\text{III}}\text{H}]$  at equilibrium

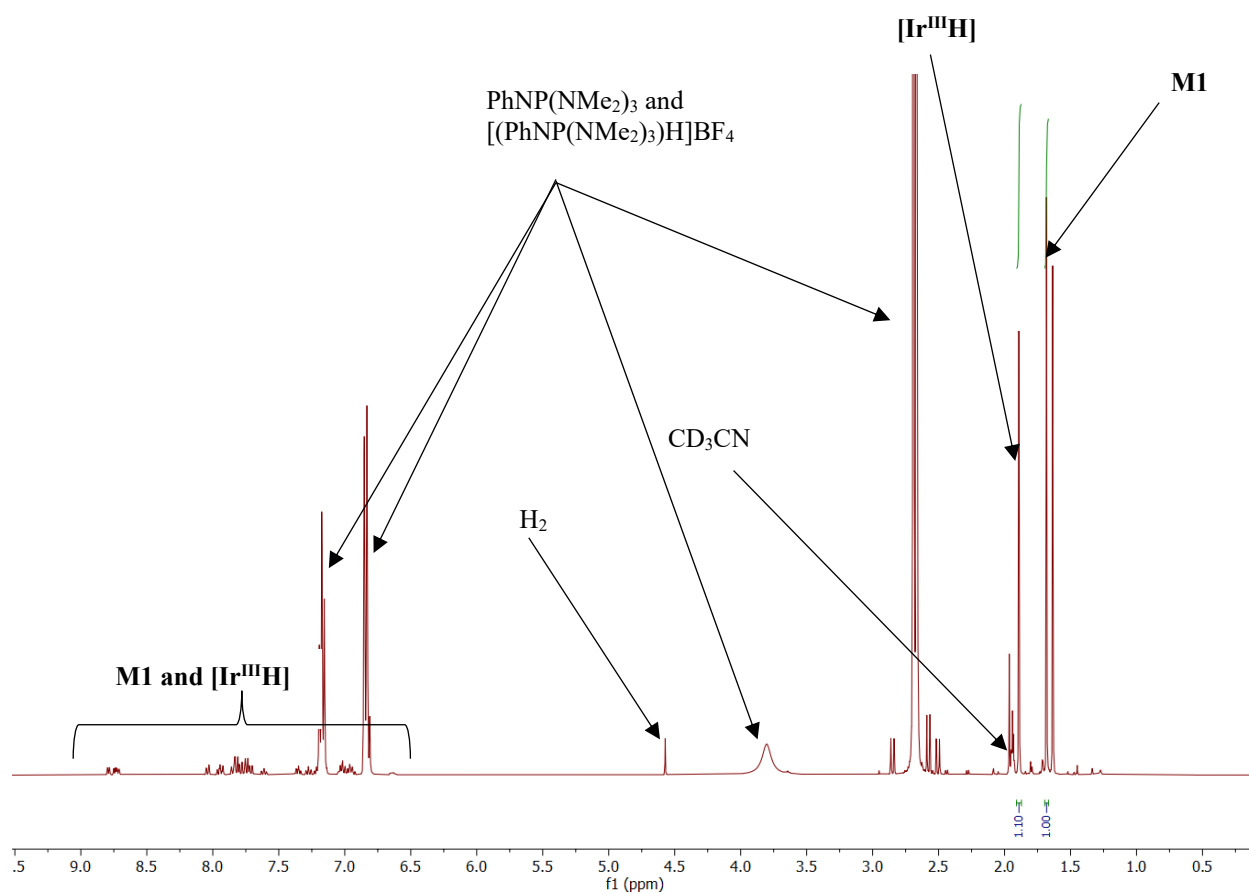

## 7. X-Ray Crystallography and Structure Refinement Details

| COMPLEX                           | M3 <sup>a)</sup>                                                                                                              | 2 <sup>b)</sup>                                                                                                               |
|-----------------------------------|-------------------------------------------------------------------------------------------------------------------------------|-------------------------------------------------------------------------------------------------------------------------------|
| EMPIRICAL FORMULA                 | C <sub>33</sub> H <sub>41</sub> MoO <sub>3</sub> P <sub>3</sub>                                                               | C <sub>38</sub> H <sub>44</sub> MoNO <sub>3</sub> P <sub>3</sub>                                                              |
| FORMULA WEIGHT                    | 674.51                                                                                                                        | 751.59                                                                                                                        |
| TEMPERATURE                       | 130(2) K                                                                                                                      | 130(2) K                                                                                                                      |
| WAVELENGTH                        | 71.073 pm                                                                                                                     | 71.073 pm                                                                                                                     |
| CRYSTAL SYSTEM                    | Monoclinic                                                                                                                    | Monoclinic                                                                                                                    |
| SPACE GROUP                       | P2 <sub>1</sub> /c                                                                                                            | C2/c                                                                                                                          |
| UNIT CELL DIMENSIONS              | a = 1632.26(3) pm $\alpha = 90^\circ$<br>b = 1091.79(1) pm $\beta = 98.153(1)^\circ$<br>c = 3625.61(5) pm $\gamma = 90^\circ$ | a = 3907.6(3) pm $\alpha = 90^\circ$<br>b = 1166.00(6) pm $\beta = 100.657(6)^\circ$<br>c = 1604.35(9) pm $\gamma = 90^\circ$ |
| VOLUME                            | 6.3958(2) nm <sup>3</sup>                                                                                                     | 7.1838(7) nm <sup>3</sup>                                                                                                     |
| Z                                 | 8                                                                                                                             | 8                                                                                                                             |
| DENSITY (CALCULATED)              | 1.401 Mg/m <sup>3</sup>                                                                                                       | 1.390 Mg/m <sup>3</sup>                                                                                                       |
| ABSORPTION COEFFICIENT            | 0.592 mm <sup>-1</sup>                                                                                                        | 0.536 mm <sup>-1</sup>                                                                                                        |
| F(000)                            | 2800                                                                                                                          | 3120                                                                                                                          |
| CRYSTAL SIZE                      | 0.20 x 0.20 x 0.07 mm <sup>3</sup>                                                                                            | 0.10 x 0.05 x 0.01 mm <sup>3</sup>                                                                                            |
| THETA RANGE                       | 1.572 to 28.057°                                                                                                              | 1.825 to 28.058°                                                                                                              |
| INDEX RANGES                      | -19 ≤ h ≤ 20, -14 ≤ k ≤ 14, -45 ≤ l ≤ 47                                                                                      | -47 ≤ h ≤ 51, -15 ≤ k ≤ 15, -20 ≤ l ≤ 21                                                                                      |
| REFLECTIONS COLLECTED             | 64545                                                                                                                         | 33909                                                                                                                         |
| INDEPENDENT REFLECTIONS           | 14435 [R(int) = 0.0602]                                                                                                       | 7776 [R(int) = 0.1913]                                                                                                        |
| COMPLETENESS TO THETA             | 99.9%                                                                                                                         | 99.9%                                                                                                                         |
| ABSORPTION CORRECTION             | Semi-empirical from equivalents                                                                                               | Semi-empirical from equivalents                                                                                               |
| MAX. AND MIN. TRANSMISSION        | 1.00000 and 0.98853                                                                                                           | 1.00000 and 0.56603                                                                                                           |
| REFINEMENT METHOD                 | Full-matrix least-squares on F <sup>2</sup>                                                                                   | Full-matrix least-squares on F <sup>2</sup>                                                                                   |
| RESTRAINTS / PARAMETERS           | 90 / 797                                                                                                                      | 0 / 423                                                                                                                       |
| GOODNESS-OF-FIT ON F <sup>2</sup> | 1.037                                                                                                                         | 0.983                                                                                                                         |
| FINAL R INDICES [I>Σ(I)]          | R1 = 0.0458, wR2 = 0.0852                                                                                                     | R1 = 0.0710, wR2 = 0.1116                                                                                                     |
| R INDICES (ALL DATA)              | R1 = 0.0745, wR2 = 0.0961                                                                                                     | R1 = 0.1811, wR2 = 0.1490                                                                                                     |
| RESIDUAL ELECTRON DENSITY         | 0.802 and -0.402 e·Å <sup>-3</sup>                                                                                            | 0.866 and -1.326 e·Å <sup>-3</sup>                                                                                            |
| CCDC NUMBER                       | 2210067                                                                                                                       | 2210068                                                                                                                       |

**Comments:** <sup>a)</sup> Three isopropyl substituents are disordered with a ratio of C(25), C(26), C(27) = 0.704(7):0.296(7), C(28), C(29), C(30) = 0.577(7):0.423(7) and C(55), C(56), C(57) = 0.542(7):0.458(7). <sup>b)</sup> It was very difficult to find and isolate a suitable single crystal with an acceptable quality. For the small sized crystal the results are acceptable.

| COMPLEX                           | [Mo(CO) <sub>3</sub> ;RhCl] (3) <sup>a)</sup>                                                                      | [Mo(CO) <sub>3</sub> ;IrCl] (4) <sup>b)</sup>                                                        |
|-----------------------------------|--------------------------------------------------------------------------------------------------------------------|------------------------------------------------------------------------------------------------------|
| EMPIRICAL FORMULA                 | C <sub>50.61</sub> H <sub>63.63</sub> Cl <sub>4.19</sub> MoNO <sub>3</sub> P <sub>3</sub> Rh                       | C <sub>49.50</sub> H <sub>61</sub> Cl <sub>4</sub> IrMoNO <sub>3</sub> P <sub>3</sub>                |
| FORMULA WEIGHT                    | 1174.09                                                                                                            | 1240.84                                                                                              |
| TEMPERATURE                       | 130(2) K                                                                                                           | 130(2) K                                                                                             |
| WAVELENGTH                        | 71.073 pm                                                                                                          | 71.073 pm                                                                                            |
| CRYSTAL SYSTEM                    | Triclinic                                                                                                          | Monoclinic                                                                                           |
| SPACE GROUP                       | P1                                                                                                                 | P2 <sub>1</sub> /n                                                                                   |
| UNIT CELL DIMENSIONS              | a = 1178.35(2) pm    α = 94.009(2)°<br>b = 1322.26(3) pm    β = 99.330(2)°<br>c = 3556.69(6) pm    γ = 103.938(2)° | a = 1884.95(3) pm    α = 90°<br>b = 1541.75(2) pm    β = 116.672(2)°<br>c = 1974.79(3) pm    γ = 90° |
| VOLUME                            | 5.2729(2) nm <sup>3</sup>                                                                                          | 5.1283(2) nm <sup>3</sup>                                                                            |
| Z                                 | 4                                                                                                                  | 4                                                                                                    |
| DENSITY (CALCULATED)              | 1.479 Mg/m <sup>3</sup>                                                                                            | 1.607 Mg/m <sup>3</sup>                                                                              |
| ABSORPTION COEFFICIENT            | 0.895 mm <sup>-1</sup>                                                                                             | 3.180 mm <sup>-1</sup>                                                                               |
| F(000)                            | 2406                                                                                                               | 2484                                                                                                 |
| CRYSTAL SIZE                      | 0.40 x 0.20 x 0.05 mm <sup>3</sup>                                                                                 | 0.46 x 0.30 x 0.15 mm <sup>3</sup>                                                                   |
| THETA RANGE FOR DATA              | 1.798 to 31.698°.                                                                                                  | 1.791 to 32.191°.                                                                                    |
| INDEX RANGES                      | -16 ≤ h ≤ 17, -19 ≤ k ≤ 19, -52 ≤ l ≤ 50                                                                           | -27 ≤ h ≤ 28, -22 ≤ k ≤ 23, -29 ≤ l ≤ 28                                                             |
| REFLECTIONS COLLECTED             | 84114                                                                                                              | 74239                                                                                                |
| INDEPENDENT REFLECTIONS           | 33406 [R(int) = 0.0486]                                                                                            | 16973 [R(int) = 0.0573]                                                                              |
| COMPLETENESS TO THETA             | 99.9%                                                                                                              | 99.9%                                                                                                |
| ABSORPTION CORRECTION             | Semi-empirical from equivalents                                                                                    | Analytical                                                                                           |
| MAX. AND MIN. TRANSMISSION        | 1.00000 and 0.97020                                                                                                | 0.678 and 0.411                                                                                      |
| REFINEMENT METHOD                 | Full-matrix least-squares on F <sup>2</sup>                                                                        | Full-matrix least-squares on F <sup>2</sup>                                                          |
| RESTRAINTS / PARAMETERS           | 79 / 1225                                                                                                          | 72 / 616                                                                                             |
| GOODNESS-OF-FIT ON F <sup>2</sup> | 1.049                                                                                                              | 1.075                                                                                                |
| FINAL R INDICES [I>Σ(I)]          | R1 = 0.0496, wR2 = 0.1142                                                                                          | R1 = 0.0472, wR2 = 0.1116                                                                            |
| R INDICES (ALL DATA)              | R1 = 0.0691, wR2 = 0.1263                                                                                          | R1 = 0.0753, wR2 = 0.1275                                                                            |
| RESIDUAL ELECTRON DENSITY         | 1.130 and -1.462 e·Å <sup>-3</sup>                                                                                 | 3.811 and -1.867 e·Å <sup>-3</sup>                                                                   |
| CCDC NUMBER                       | 2210069                                                                                                            | 2210070                                                                                              |

**Comments:** <sup>a)</sup> The compound crystallized from a methylene chloride/*n*-pentane solution. The two methylene chloride molecules (C17, C18, C99 and C19, C110, C100) are disordered with one *n*-pentane molecule (C101 to C105) with a ratio of 0.593(3):0.407(3), i.e. 0.593 mol disordered CH<sub>2</sub>Cl<sub>2</sub> molecules and 0.407 / 2 = 0.204 mol disordered *n*-pentane molecules. All attempts to describe this disorder as a pure methylene chloride disorder failed and gave unacceptable results. <sup>b)</sup> The iridium coordinated part of the molecules may be marginally disordered with a ratio of 0.9628(8):0.0372(8). For the minor 4% disordered part only the most electron-rich iridium center could be located. All solvent molecules (CH<sub>2</sub>Cl<sub>2</sub>) are disordered to a certain extent, and especially the one in the vicinity of the center

of inversion was difficult to locate within a reasonable accuracy. The total amount of all solvent molecules was confirmed with a SQUEEZE electron count [20].

| COMPLEX                           | [Mo <sup>0</sup> (CO) <sub>3</sub> ;Rh <sup>III</sup> (CO)]PF <sub>6</sub> <sup>a)</sup>     | [Mo <sup>0</sup> (CO) <sub>3</sub> ;Ir <sup>III</sup> (N <sub>2</sub> )]PF <sub>6</sub> <sup>b)</sup> |
|-----------------------------------|----------------------------------------------------------------------------------------------|-------------------------------------------------------------------------------------------------------|
| EMPIRICAL FORMULA                 | C <sub>56</sub> H <sub>72</sub> F <sub>6</sub> MoNO <sub>5.75</sub> P <sub>4</sub> Rh        | C <sub>55</sub> H <sub>72</sub> F <sub>6</sub> IrMoN <sub>3</sub> O <sub>4.75</sub> P <sub>4</sub>    |
| FORMULA WEIGHT                    | 1287.87                                                                                      | 1377.17                                                                                               |
| TEMPERATURE                       | 130(2) K                                                                                     | 130(2) K                                                                                              |
| WAVELENGTH                        | 71.073 pm                                                                                    | 71.073 pm                                                                                             |
| CRYSTAL SYSTEM                    | Orthorhombic                                                                                 | Orthorhombic                                                                                          |
| SPACE GROUP                       | Pbca                                                                                         | Pbca                                                                                                  |
| UNIT CELL DIMENSIONS              | a = 1835.14(2) pm    α = 90°<br>b = 1638.00(2) pm    β = 90°<br>c = 3831.54(5) pm    γ = 90° | a = 1840.61(2) pm    α = 90°<br>b = 1644.88(2) pm    β = 90°<br>c = 3844.42(4) pm    γ = 90°          |
| VOLUME                            | 11.5175(2) nm <sup>3</sup>                                                                   | 11.6393(2) nm <sup>3</sup>                                                                            |
| Z                                 | 8                                                                                            | 8                                                                                                     |
| DENSITY (CALCULATED)              | 1.485 Mg/m <sup>3</sup>                                                                      | 1.572 Mg/m <sup>3</sup>                                                                               |
| ABSORPTION COEFFICIENT            | 0.683 mm <sup>-1</sup>                                                                       | 2.676 mm <sup>-1</sup>                                                                                |
| F(000)                            | 5296                                                                                         | 5552                                                                                                  |
| CRYSTAL SIZE                      | 0.20 x 0.15 x 0.10 mm <sup>3</sup>                                                           | 0.30 x 0.20 x 0.02 mm <sup>3</sup>                                                                    |
| THETA RANGE FOR DATA              | 1.977 to 26.914°                                                                             | 1.970 to 26.727°                                                                                      |
| INDEX RANGES                      | -22 ≤ h ≤ 22, -19 ≤ k ≤ 19, -48 ≤ l ≤ 47                                                     | -21 ≤ h ≤ 23, -20 ≤ k ≤ 19, -48 ≤ l ≤ 48                                                              |
| REFLECTIONS COLLECTED             | 61110                                                                                        | 107782                                                                                                |
| INDEPENDENT REFLECTIONS           | 11563 [R(int) = 0.0623]                                                                      | 11732 [R(int) = 0.0579]                                                                               |
| COMPLETENESS TO THETA             | 99.9%                                                                                        | 99.9%                                                                                                 |
| ABSORPTION CORRECTION             | Semi-empirical from equivalents                                                              | Semi-empirical from equivalents                                                                       |
| MAX. AND MIN. TRANSMISSION        | 1.00000 and 0.92073                                                                          | 1.00000 and 0.68575                                                                                   |
| REFINEMENT METHOD                 | Full-matrix least-squares on F <sup>2</sup>                                                  | Full-matrix least-squares on F <sup>2</sup>                                                           |
| RESTRAINTS / PARAMETERS           | 184 / 667                                                                                    | 211 / 691                                                                                             |
| GOODNESS-OF-FIT ON F <sup>2</sup> | 1.190                                                                                        | 1.115                                                                                                 |
| FINAL R INDICES [I>Σ(I)]          | R1 = 0.0701, wR2 = 0.1316                                                                    | R1 = 0.0568, wR2 = 0.1064                                                                             |
| R INDICES (ALL DATA)              | R1 = 0.0886, wR2 = 0.1378                                                                    | R1 = 0.0768, wR2 = 0.1135                                                                             |
| RESIDUAL ELECTRON DENSITY         | 0.935 and -0.587 e·Å <sup>-3</sup>                                                           | 2.170 and -1.472 e·Å <sup>-3</sup>                                                                    |
| CCDC NUMBER                       | 2210071                                                                                      | 2210072                                                                                               |

**Comments:** <sup>a)</sup> Two <sup>i</sup>Pr substituents (C30 to C36) are disordered with a ratio of 0.55(1):0.45(1). The sample was crystallized from THF with small amounts of *n*-hexane. Attempts to locate disordered solvent molecules with a reasonable accuracy failed. The electron density for these highly disordered solvent molecules has been removed with the SQUEEZE routine implemented in PLATON the squeeze electron count suggests the electron density of approximately 14 poorly defined and diffusely oriented THF molecules in the unit cell [20]. These molecules represent



an electron density of 560 ( $14 \times 40$ ) electrons. This value is in accordance with the estimated "squeezed" electron density of 576 electrons. The "squeezed volume" for this structure is in the range of approximately  $2.069 \text{ nm}^3$  ( $2069 \text{ \AA}^3$ ) for the unit cell. A volume of  $148 \text{ \AA}^3$  for one THF molecule (approximately  $30 \text{ \AA}^3$  for each non-hydrogen atom) is acceptable for loosely packed and disordered solvent molecules. The given formula has been corrected for this solvent contribution. Rhodium is most likely coordinated by CO. The molecular formula can be given as  $[\text{RhMo}(\text{CO})_4(\text{C}_{35}\text{H}_{43}\text{NP}_3)(\text{C}_{10}\text{H}_{15})] [\text{PF}_6] \cdot 1.75 \text{ THF}$ . <sup>b)</sup>Anisotropic refinement of all non-hydrogen atoms, except the disordered  $\text{N}_2$  molecule in the vicinity of iridium and the minor 12% fraction of the disordered  $\text{PF}_6^-$  anion, with SHELXL-2018 [11,21]. All hydrogen atoms were calculated on idealized positions. The  $\text{N}_2$  ligand, two  $i\text{Pr}$  substituents and the  $\text{PF}_6^-$  anion are disordered. In detail: N2, N3: 0.59(3):0.41(3); C30 to C36: 0.49(1):0.51(1) and P4, F1 to F6: 0.88(1):0.12(1). The sample was crystallized from THF with small amounts of *n*-hexane. Attempts to locate disordered solvent molecules with a reasonable accuracy failed. The electron density for these highly disordered solvent molecules has been removed with the SQUEEZE routine implemented in PLATON; the squeeze electron suggests the electron density of approximately 14 poorly defined and diffusely oriented THF molecules from the unit cell [20]. These molecules represent an electron density of 566 electrons. This value is in accordance with the estimated "squeezed" electron density of 560 ( $14 \times 40$ ) electrons. The "squeezed volume" for this structure is in the range of approximately  $2.130 \text{ nm}^3$  ( $2130 \text{ \AA}^3$ ) for the unit cell. A volume of  $152 \text{ \AA}^3$  for one THF molecule (approximately  $30 \text{ \AA}^3$  for each non-hydrogen atom) is acceptable for loosely packed and disordered solvent molecules. The given formula has been corrected for this solvent contribution. Iridium was surprisingly not coordinated by the solvent used for the synthesis (THF and/or acetonitrile). From the experimental results we inferred that dinitrogen, which was in use as a protecting gas, is coordinating end-on and side-on to iridium in a disordered fashion. The molecular formula can be given as  $[\text{IrMo}(\text{CO})_3(\text{N}_2)(\text{C}_{35}\text{H}_{43}\text{NP}_3)(\text{C}_{10}\text{H}_{15})] [\text{PF}_6] \cdot 1.75 \text{ THF}$ .

## 8. Electrochemical Data

### 8.1. Cyclic Voltammogram of **M3**<sup>a)</sup>

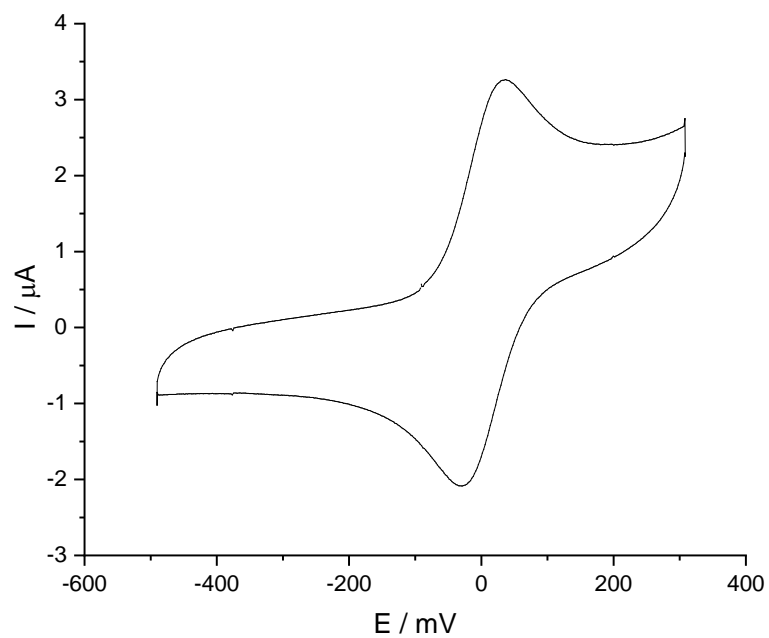

<sup>a)</sup> Reaction conditions: concentration 1 mM in 0.1 M [<sup>n</sup>Bu<sub>4</sub>N]PF<sub>6</sub> in MeCN.

## 8.2. Cyclic Voltammogram of **M3** and **M1**<sup>a)</sup>

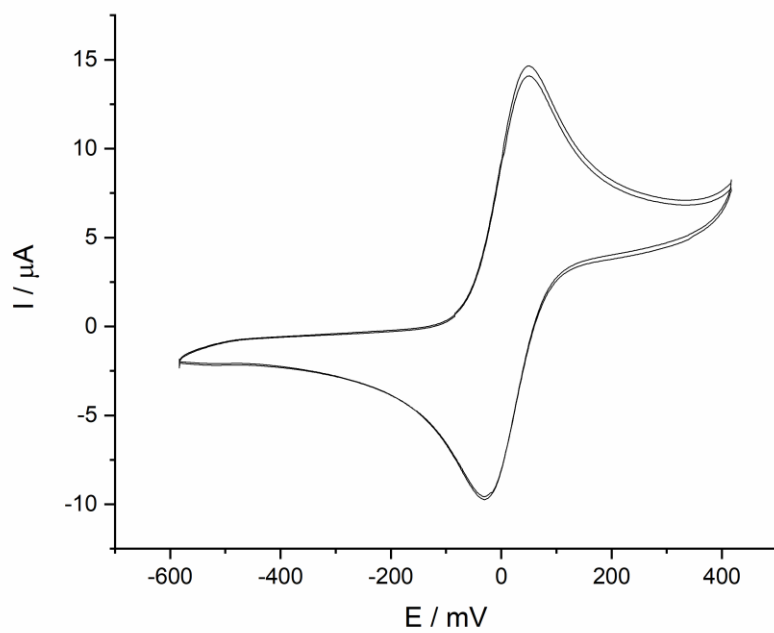

<sup>a)</sup> Reaction conditions: concentration 3 mM each in 0.1 M [<sup>n</sup>Bu<sub>4</sub>N]PF<sub>6</sub> in MeCN.

### 8.3. Cyclic Voltammogram of **M3** and **M2**<sup>a)</sup>

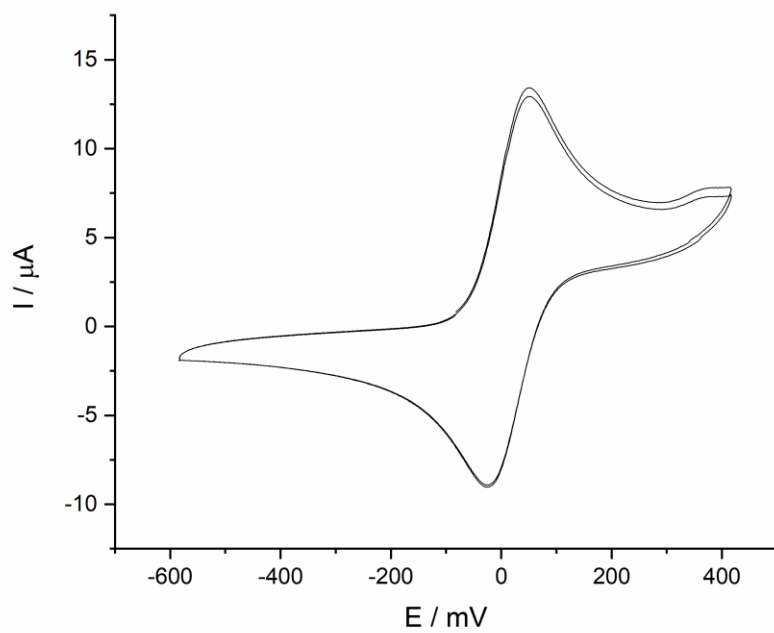

<sup>a)</sup> Reaction conditions: concentration 3 mM each in 0.1 M [ $n\text{Bu}_4\text{N}$ ]PF<sub>6</sub> in MeCN.

#### 8.4. Cyclic Voltammogram of **C2**<sup>b)</sup>

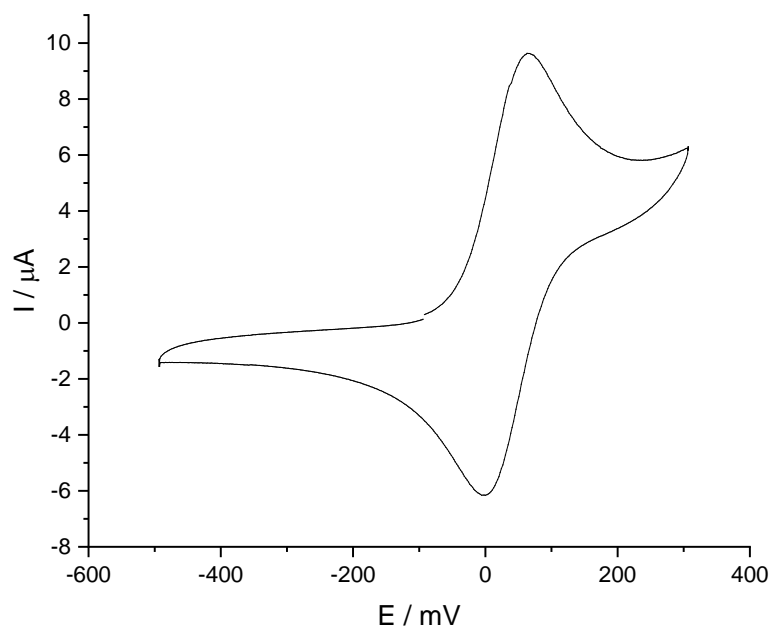

<sup>b)</sup>Reaction conditions: concentration 3 mM in 0.1 M [<sup>n</sup>Bu<sub>4</sub>N]PF<sub>6</sub> in MeCN.

### 8.5. Cyclic Voltammogram of **C1**<sup>c)</sup>

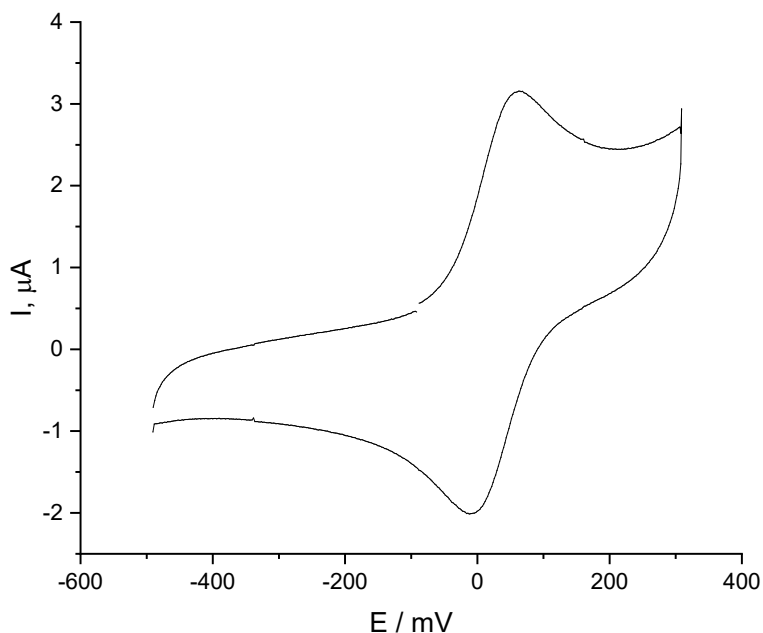

<sup>c)</sup>Reaction conditions: concentration 1 mM in 0.1 M [<sup>n</sup>Bu<sub>4</sub>N]PF<sub>6</sub> in MeCN.

## 9. Gibbs Free Energies

| Intermediate                                                       | Base             | MeCN (M1) | DMSO  | H <sub>2</sub> O | MeOH  |
|--------------------------------------------------------------------|------------------|-----------|-------|------------------|-------|
| <b>[Ir<sup>III</sup>(solv)]<sup>+</sup></b>                        | DBU              | 0.0       | 0.0   | 0.0              | 0.0   |
|                                                                    | NEt <sub>3</sub> | 0.0       | 0.0   | 0.0              | 0.0   |
| <b>[Ir<sup>III</sup>(base)]<sup>+</sup></b>                        | DBU              | -48.4     | -25.2 | -65.9            | -68.9 |
|                                                                    | NEt <sub>3</sub> | 15.7      | 37.8  | -2.1             | -4.6  |
| <b>[Ir<sup>III</sup>(η<sup>2</sup>-H<sub>2</sub>)]<sup>+</sup></b> | DBU              | 49.4      | 71.4  | 31.3             | 29.2  |
|                                                                    | NEt <sub>3</sub> | 49.4      | 71.4  | 31.3             | 29.2  |
| <b>[Ir<sup>III</sup>H]</b>                                         | DBU              | -64.0     | -42.3 | -82.8            | -84.1 |
|                                                                    | NEt <sub>3</sub> | -16.4     | 5.0   | -35.9            | -36.4 |
| <b>TS3</b>                                                         | DBU              | 70.7      | 92.0  | 52.0             | 50.7  |
|                                                                    | NEt <sub>3</sub> | 118.2     | 139.3 | 98.9             | 98.4  |
| <b>[Ir<sup>III</sup>HCO<sub>2</sub>]</b>                           | DBU              | -18.8     | 2.7   | -38.1            | -38.8 |
|                                                                    | NEt <sub>3</sub> | 28.8      | 50.0  | 8.9              | 8.9   |
| <b>[Ir<sup>III</sup>(solv)]<sup>+</sup> a)</b>                     | DBU              | 5.2       | 5.3   | 5.3              | 5.2   |
|                                                                    | NEt <sub>3</sub> | 18.4      | 18.4  | 18.3             | 18.5  |

a) With considering the formation of the [[DBU(H)]HCO<sub>2</sub>] salt.

## 10. References

1. Bellan, J.; Marre, M.R.; Sanchez, M.; Wolf, R. Nouveaux ylures du phosphore a partir e tris(amino)iminophosphanes et d'esters acetyleniques. etude structurale par RMN de  $^{13}\text{C}$ . *Phosphorus Sulfur Silicon Relat. Elem.* **1981**, *12*, 11–18. <https://doi.org/10.1080/03086648108078285>.
2. Buscagan, T.M.; Oyala, P.H.; Peters, J.C.  $\text{N}_2$  -to- $\text{NH}_3$  Conversion by a triphos-Iron Catalyst and Enhanced Turnover under Photolysis. *Angew. Chem. Int. Ed.* **2017**, *56*, 6921–6926. <https://doi.org/10.1002/anie.201703244>.
3. Mankad, N.P.; Rivard, E.; Harkins, S.B.; Peters, J.C. Structural snapshots of a flexible  $\text{Cu}_2\text{P}_2$  core that accommodates the oxidation states  $\text{Cu}^{\text{I}}\text{Cu}^{\text{I}}$ ,  $\text{Cu}^{\text{I.5}}\text{Cu}^{\text{I.5}}$ , and  $\text{Cu}^{\text{II}}\text{Cu}^{\text{II}}$ . *J. Am. Chem. Soc.* **2005**, *127*, 16032–16033. <https://doi.org/10.1021/ja0560711>.
4. Li, L.; Brennessel, W.W.; Jones, W.D. C–H Activation of Phenyl Imines and 2-Phenylpyridines with  $[\text{Cp}^*\text{MCl}_2]_2$  (M = Ir, Rh): Regioselectivity, Kinetics, and Mechanism. *Organometallics* **2009**, *28*, 3492–3500. <https://doi.org/10.1021/om9000742>.
5. Hu, Y.; Li, L.; Shaw, A.P.; Norton, J.R.; Sattler, W.; Rong, Y. Synthesis, Electrochemistry, and Reactivity of New Iridium(III) and Rhodium(III) Hydrides. *Organometallics* **2012**, *31*, 5058–5064. <https://doi.org/10.1021/om300398r>.
6. Hu, Y.; Norton, J.R. Kinetics and thermodynamics of  $\text{H}^-/\text{H}^\bullet/\text{H}^+$  transfer from a rhodium(III) hydride. *J. Am. Chem. Soc.* **2014**, *136*, 5938–5948. <https://doi.org/10.1021/ja412309j>.
7. Kang, J.W.; Moseley, K.; Maitlis, P.M. Pentamethylcyclopentadienylrhodium and -iridium halides. I. Synthesis and properties. *J. Am. Chem. Soc.* **1969**, *91*, 5970–5977. <https://doi.org/10.1021/ja01050a008>.
8. Harris, R.K.; Becker, E.D.; Cabral De Menezes, S.M.; Goodfellow, R.; Granger, P. NMR nomenclature: Nuclear spin properties and conventions for chemical shifts (IUPAC recommendations 2001). *Concepts Magn. Reson.* **2002**, *14*, 326–346. <https://doi.org/10.1002/cmr.10035>.
9. Clark, R.C.; Reid, J.S. The analytical calculation of absorption in multifaceted crystals. *Acta. Crystallogr. A* **1995**, *51*, 887–897. <https://doi.org/10.1107/S0108767395007367>.
10. Rigaku Oxford Diffraction. *CrysAlisPro Software Systems*, Rigaku Corporation, Oxford, UK **201–2020**.
11. Sheldrick, G.M. SHELXT - integrated space-group and crystal-structure determination. *Acta. Crystallogr. A* **2015**, *71*, 3–8. <https://doi.org/10.1107/S2053273314026370>.
12. Gritzner, G.; Kuta, J. Recommendations on reporting electrode potentials in nonaqueous solvents (Recommendations 1983). *Pure Appl. Chem.* **1984**, *56*, 461–466. <https://doi.org/10.1351/pac198456040461>.
13. Noviadri, I.; Brown, K.N.; Fleming, D.S.; Gulyas, P.T.; Lay, P.A.. The Decamethylferrocenium/Decamethylferrocene Redox Couple: A Superior Redox Standard to the Ferrocenium/Ferrocene Redox Couple for Studying Solvent Effects on the Thermodynamics of Electron Transfer. *J Phys Chem B* **1999**, *103*, 6713–6722. <https://doi.org/10.1021/jp991381+>.
14. Burchat, A.F.; Chong, J.; Nielsen, N. Titration of alkylolithiums with a simple reagent to a blue endpoint. *J. Organomet. Chem.* **1997**, *542*, 281–283. [https://doi.org/10.1016/S0022-328X\(97\)00143-5](https://doi.org/10.1016/S0022-328X(97)00143-5).
15. Krasovskiy, A.; Knochel, P. Convenient Titration Method for Organometallic Zinc, Magnesium, and Lanthanide Reagents. *Synthesis* **2006**, *2006*, 890–891. <https://doi.org/10.1055/s-2006-926345>.
16. Albinati, A.; Bakmutov, V.I.; Caulton, K.G.; Clot, E.; Eckert, J.; Eisenstein, O.; Gusev, D.G.; Grushin, V.V.; Hauger, B.E. Reaction of molecular hydrogen ( $\text{H}_2$ ) with chlorohydrido-iridium phosphines  $\text{IrHCl}_2\text{P}_2$  (P =  $\text{P}^i\text{Pr}_3$  or  $\text{P}^i\text{Bu}_2\text{Ph}$ ): stereoelectronic control of the stability of molecular  $\text{H}_2$  transition metal complexes. *J. Am. Chem. Soc.* **1993**, *115*, 7300–7312. <https://doi.org/10.1021/ja00069a032>.
17. Desrosiers, P.J.; Cai, L.; Lin, Z.; Richards, R.; Halpern, J. Assessment of the "T1 criterion" for distinguishing between classical and nonclassical transition-metal hydrides: hydride relaxation rates in tris(triarylphosphine)osmium tetrahydrides and related polyhydrides. *J. Am. Chem. Soc.* **1991**, *113*, 4173–4184. <https://doi.org/10.1021/ja00011a019>.
18. Kubas, G.J. Dihydrogen complexes as prototypes for the coordination chemistry of saturated molecules. *Proc. Natl. Acad. Sci. USA* **2007**, *104*, 6901–6907. <https://doi.org/10.1073/pnas.0609707104>.
19. Kubas, G.J. Activation of dihydrogen and coordination of molecular  $\text{H}_2$  on transition metals. *J. Organomet. Chem.* **2014**, *751*, 33–49. <https://doi.org/10.1016/j.jorganchem.2013.07.041>.
20. Spek, A.L. PLATON SQUEEZE: a tool for the calculation of the disordered solvent contribution to the calculated structure factors. *Acta Crystallogr. C* **2015**, *71*, 9–18. <https://doi.org/10.1107/S2053229614024929>.
21. Sheldrick, G.M. A short history of SHELX. *Acta. Crystallogr. A* **2008**, *64*, 112–122. <https://doi.org/10.1107/S0108767307043930>.
